# Supplementary material for: In vivo MRI is sensitive to remyelination in a nonhuman primate model of multiple sclerosis
Source: eLife journal article supplement (doi:10.7554/elife.73786), 2023-04-21

# IBA1 and PLP IHC Raw Data

- All in x200 zoom using the same microscope
- Left: IBA1
- Right: PLP

# M#2

- 1 Chronic Demyelinated
- 9 Remyelinated

# Chronic Demyelinated

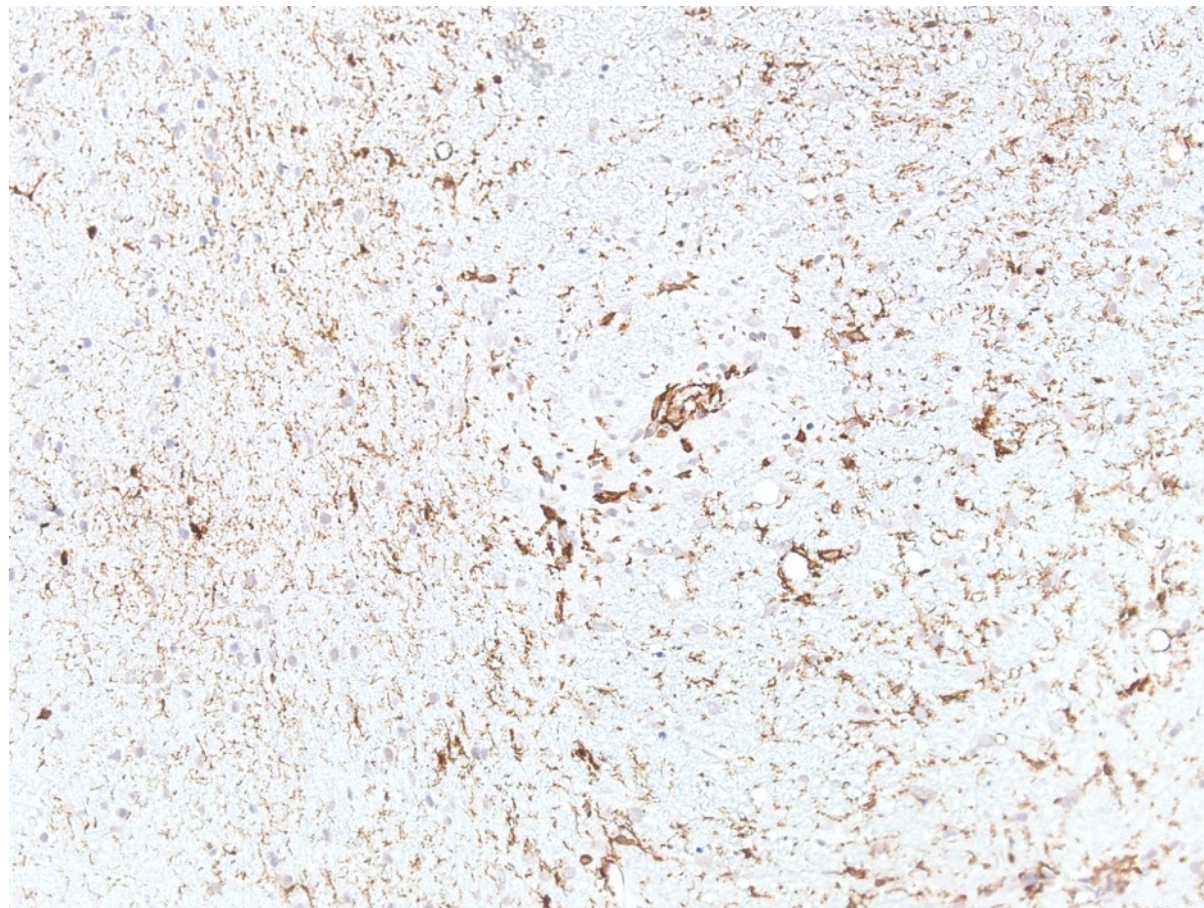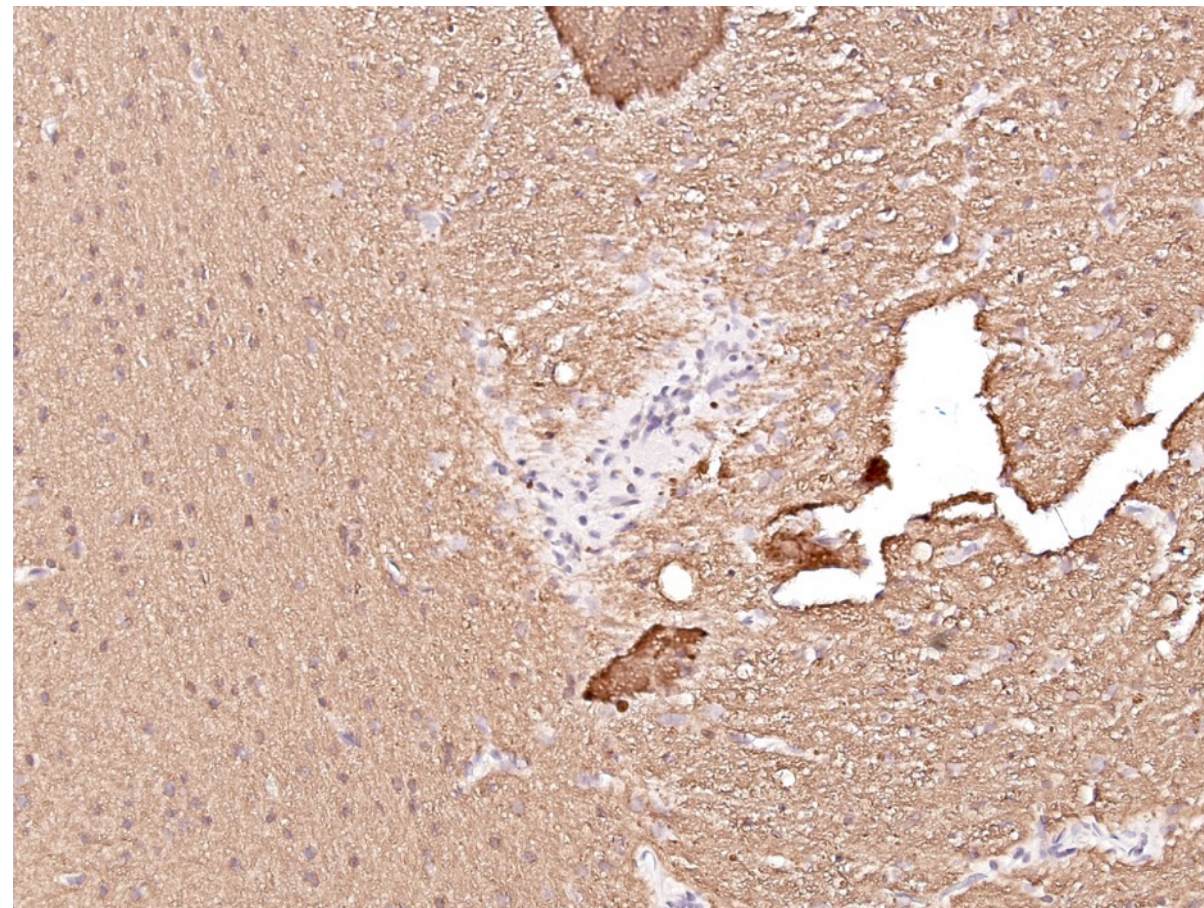

Remyelinated

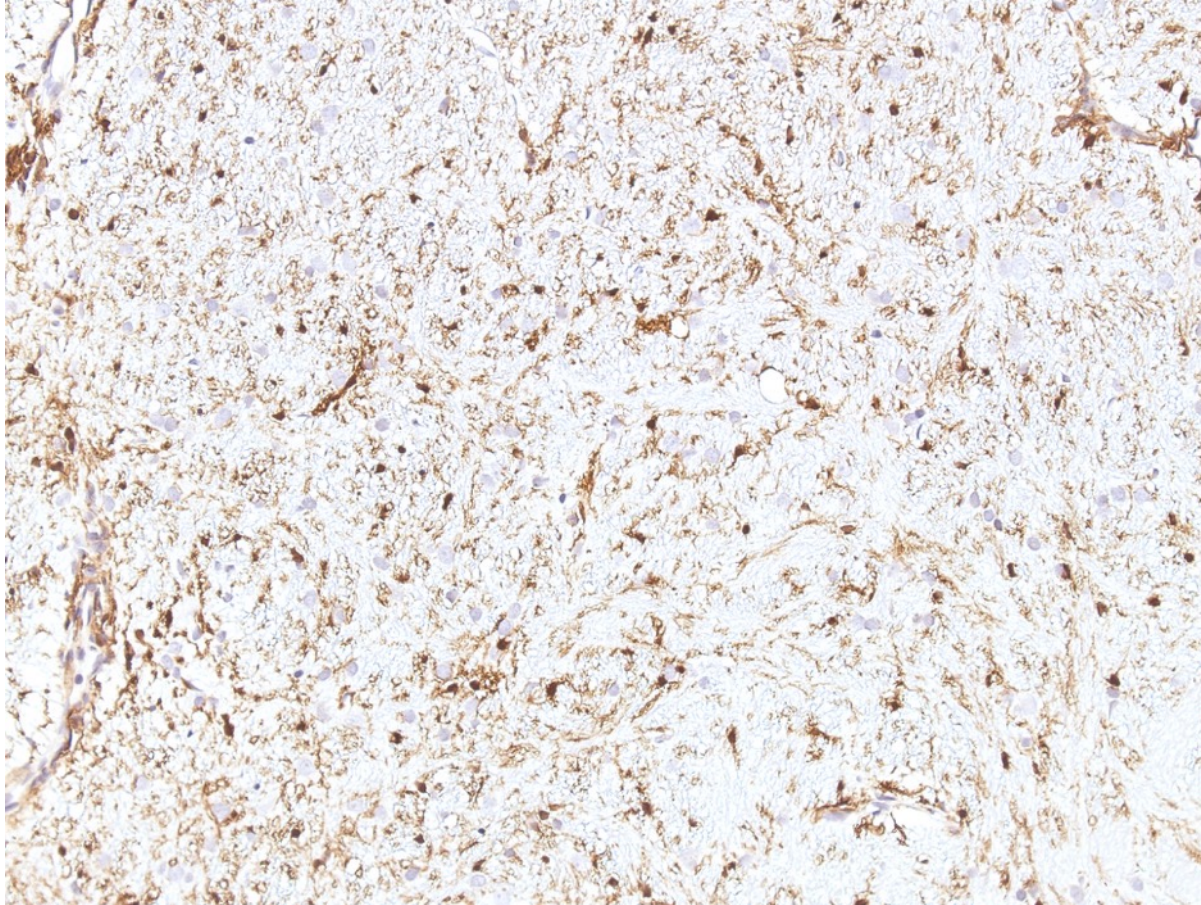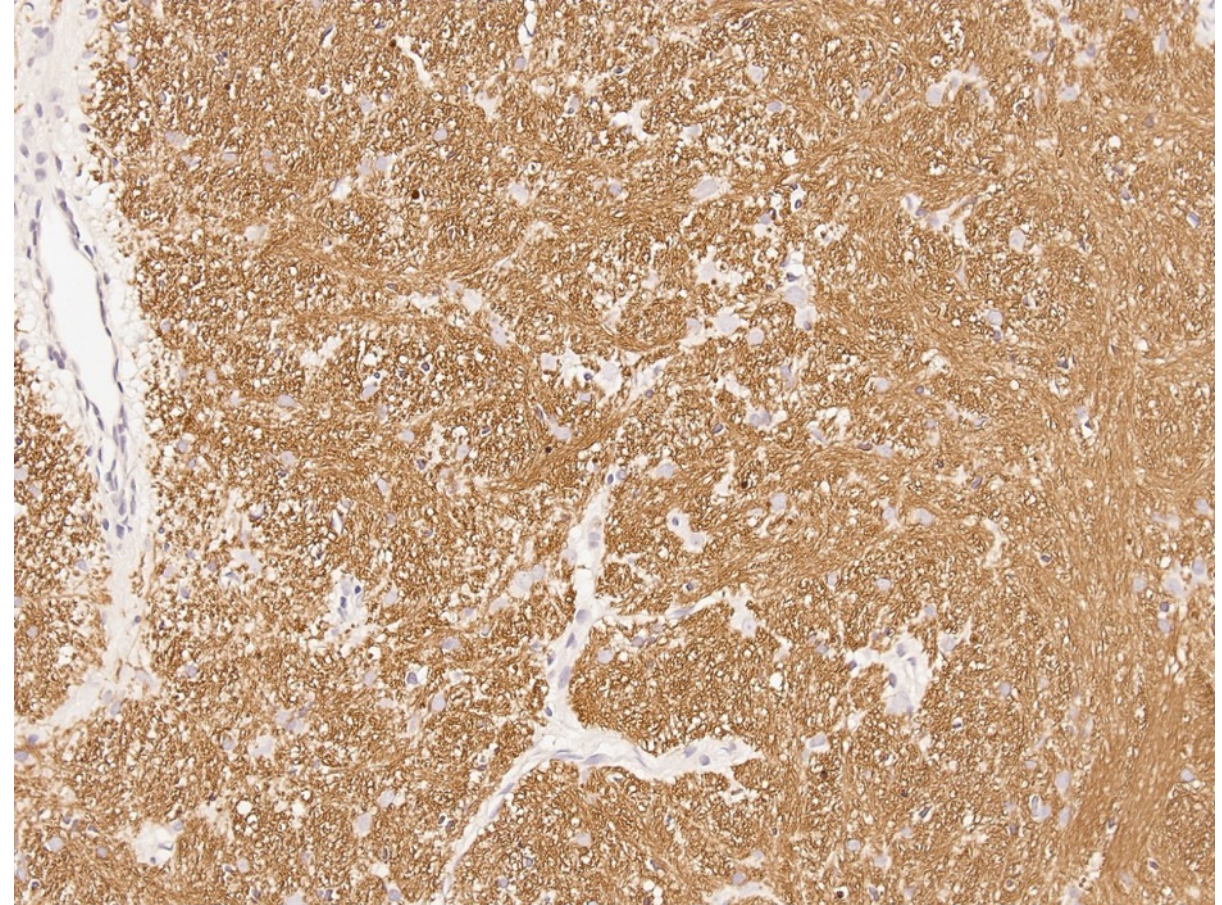

Remyelinated

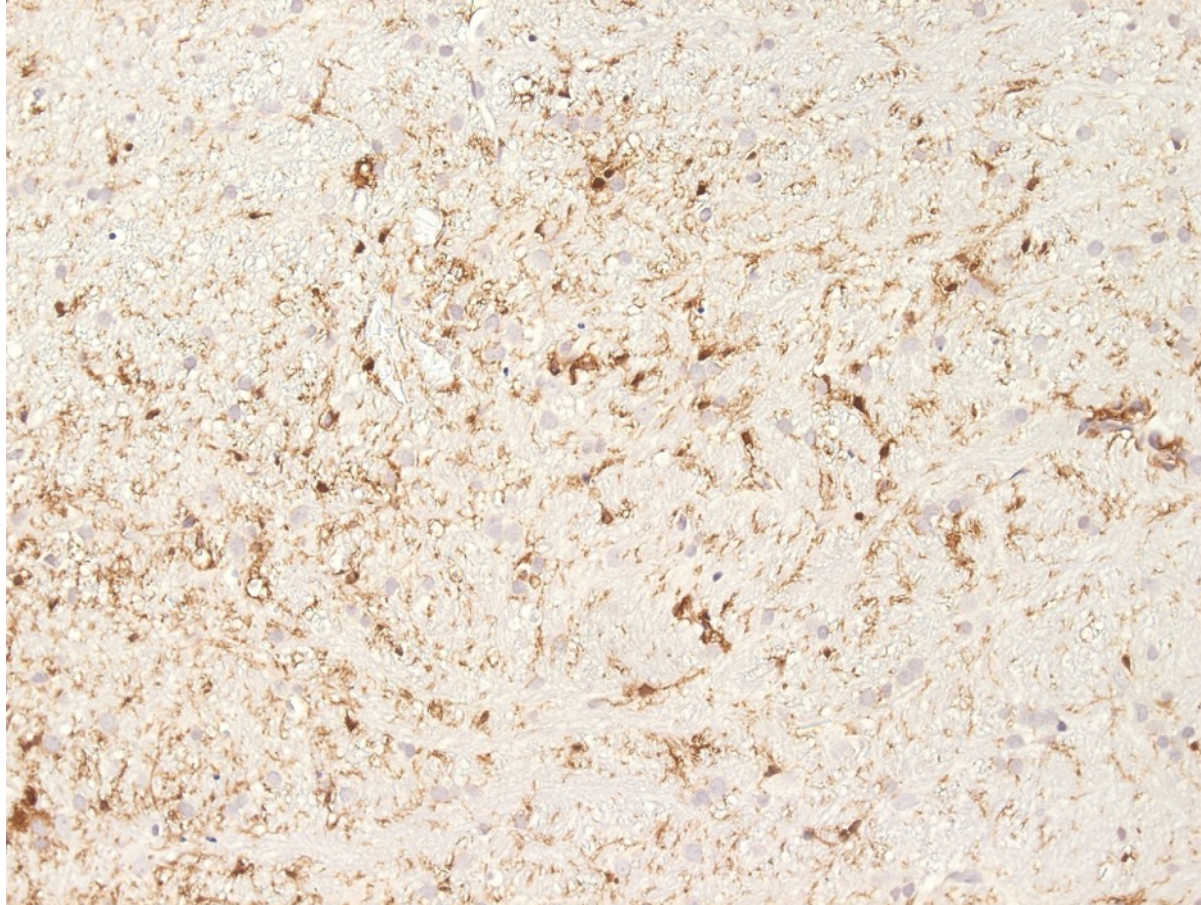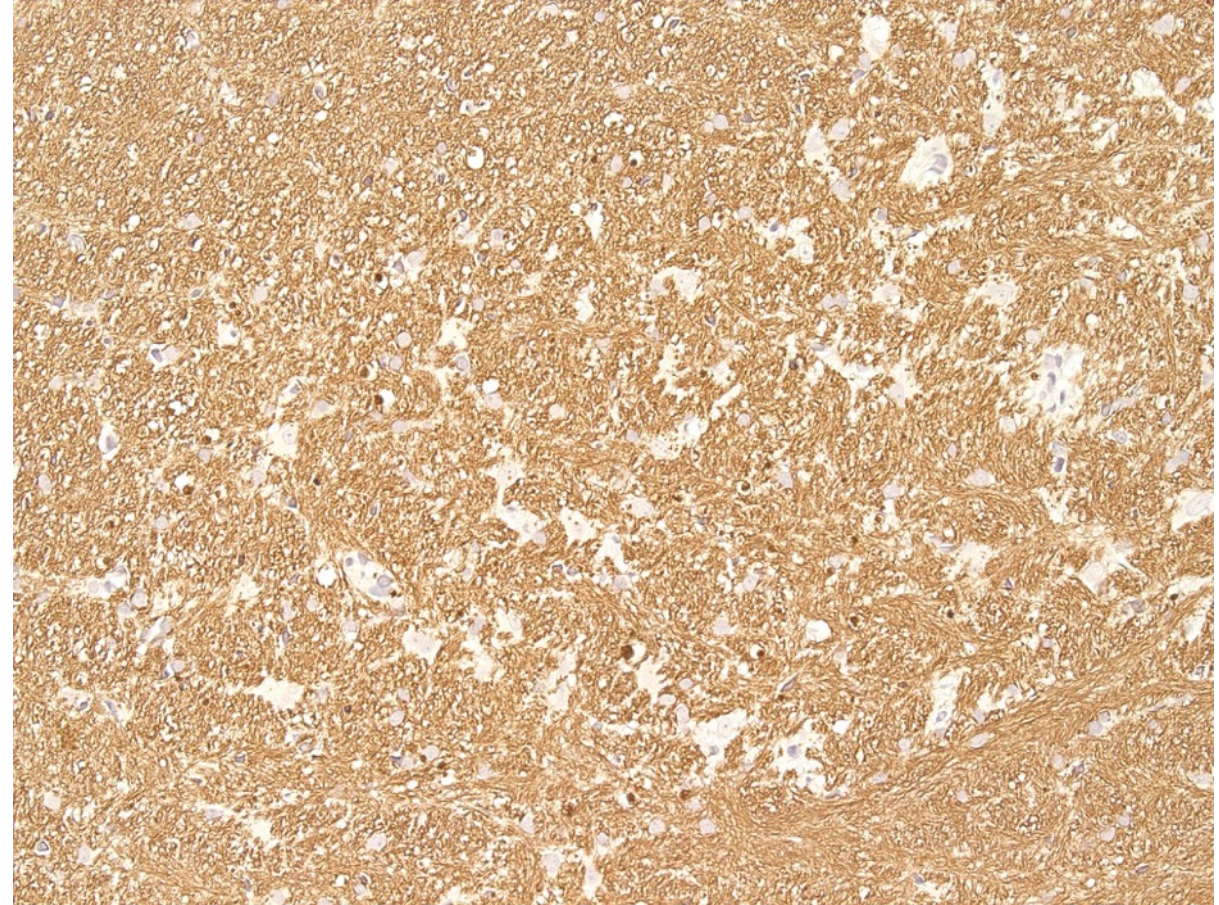

Remyelinated

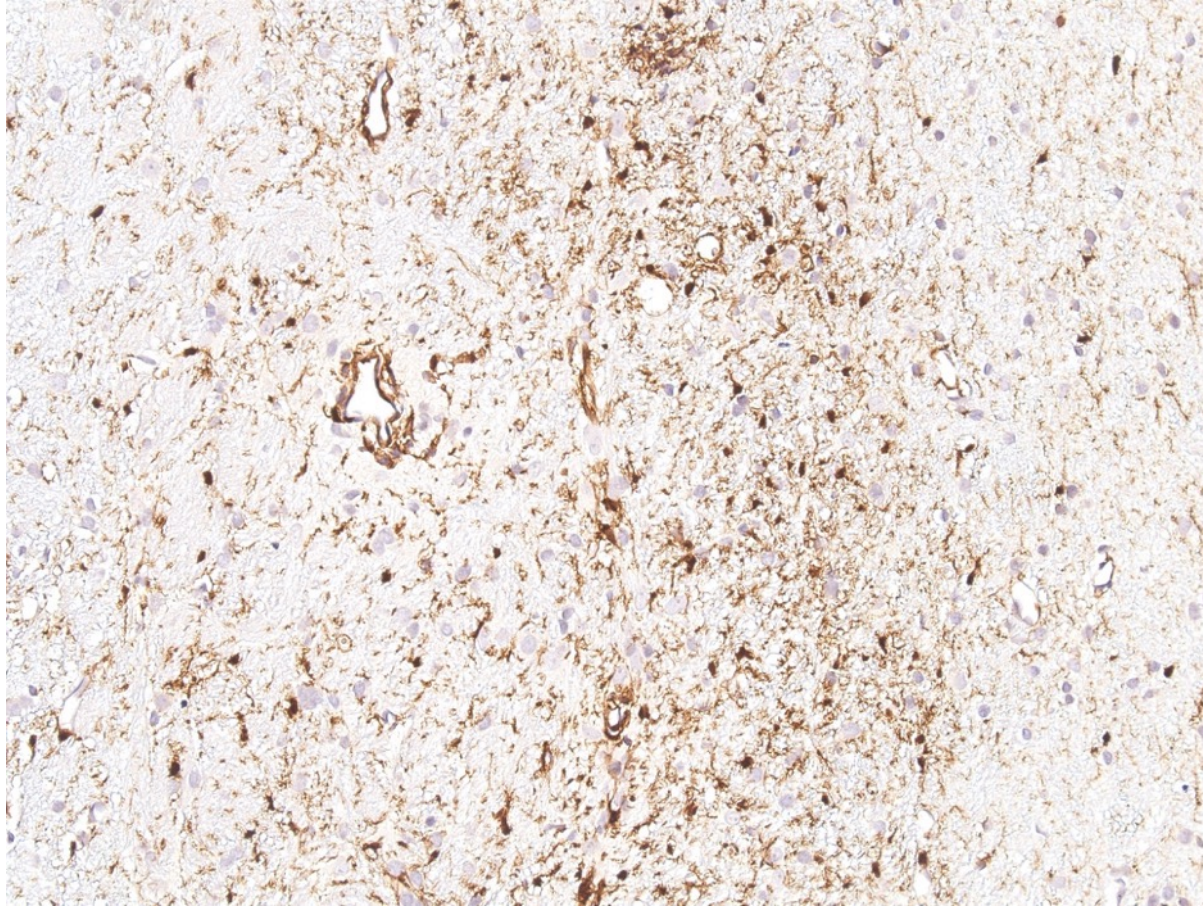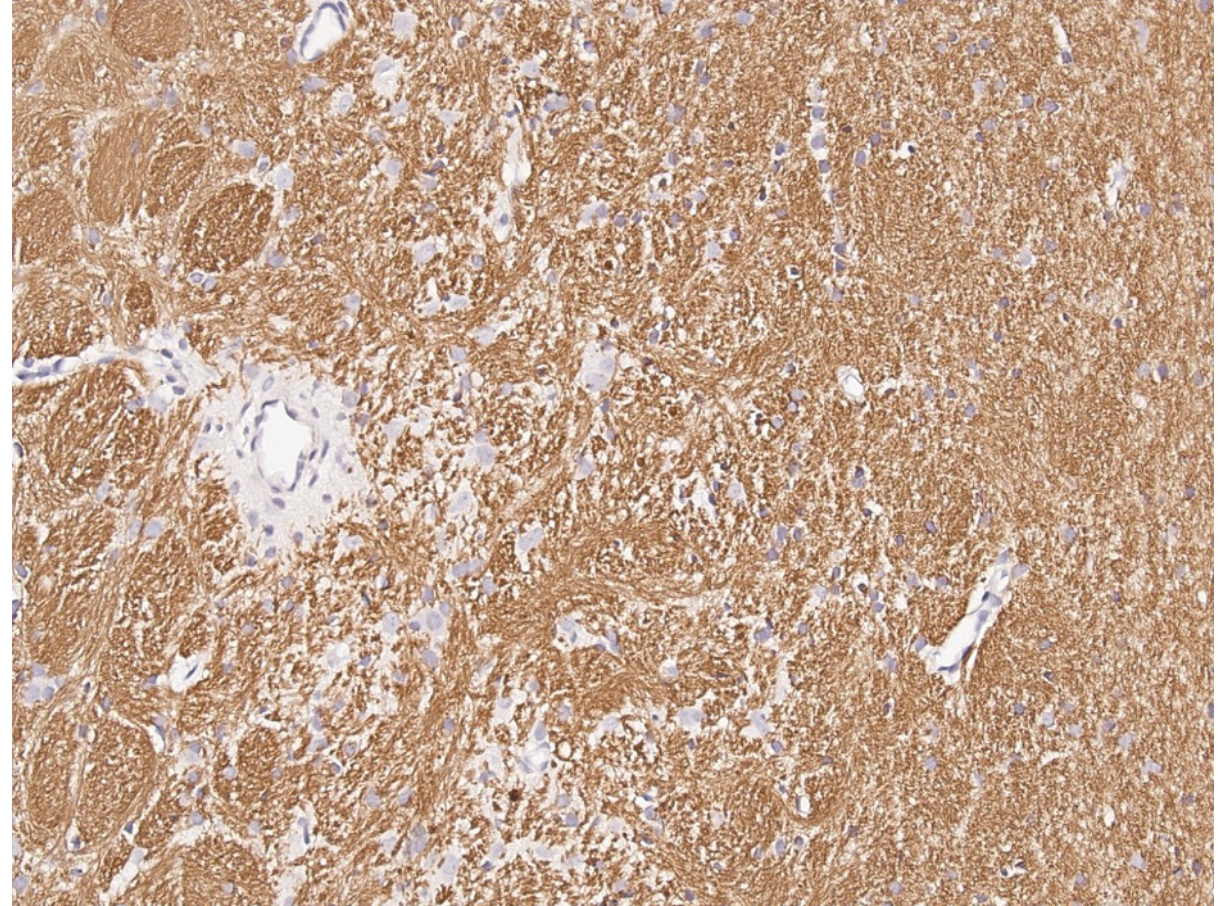

Remyelinated

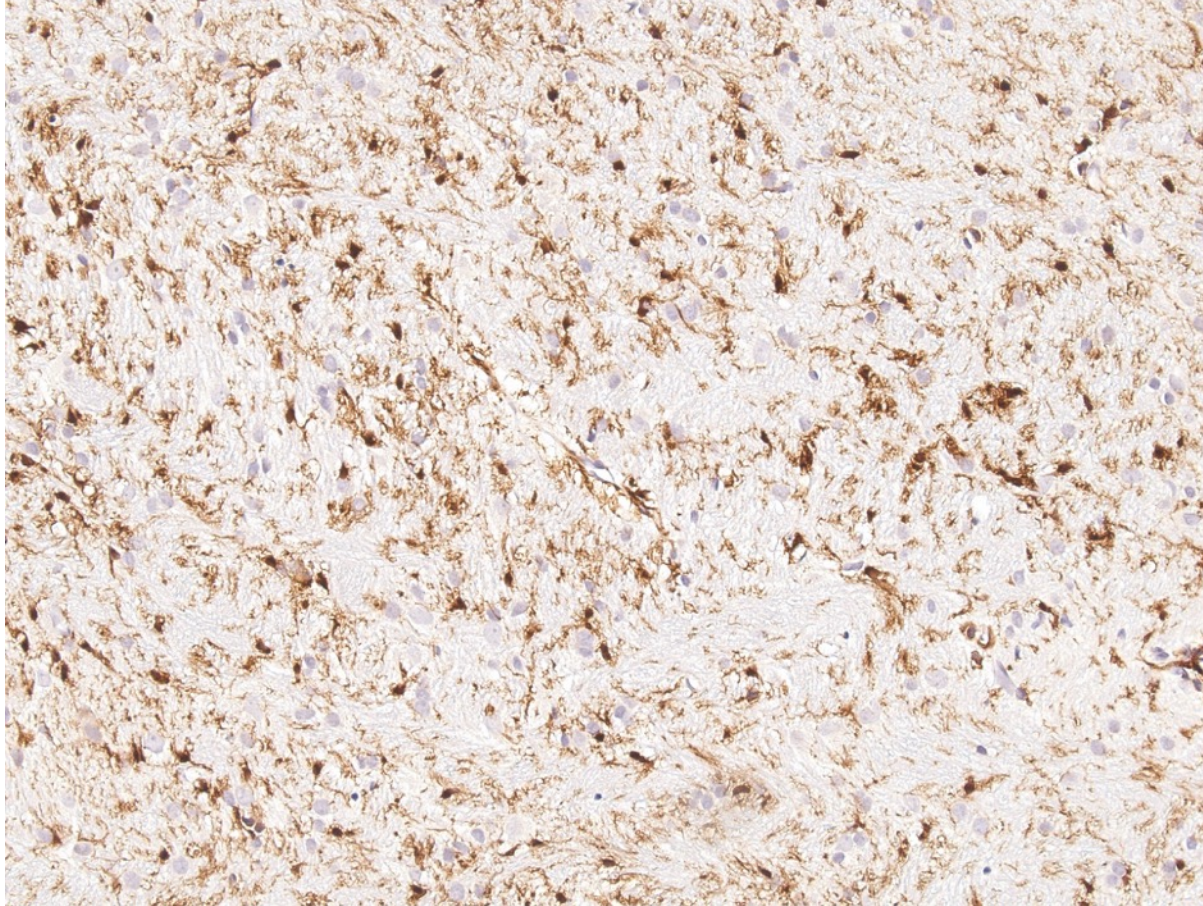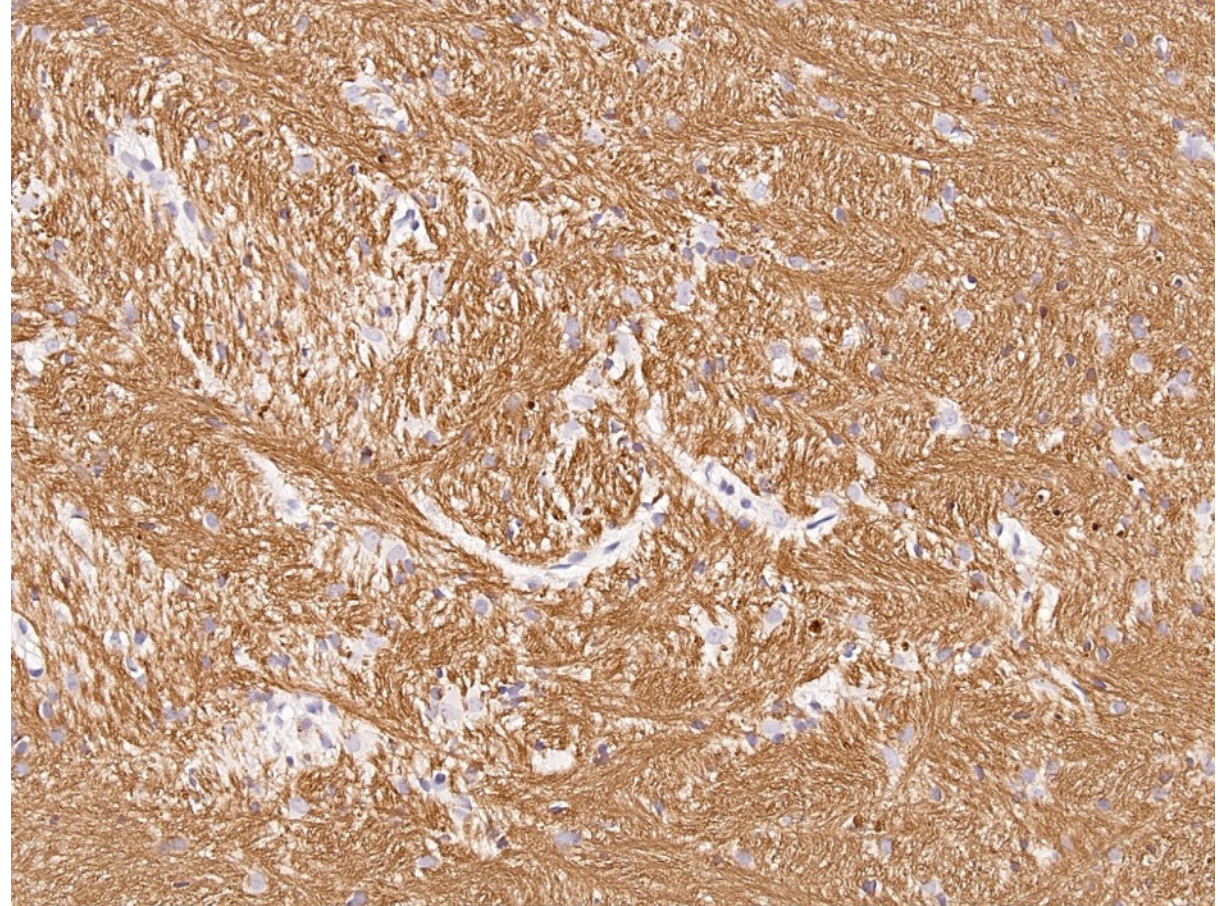

Remyelinated

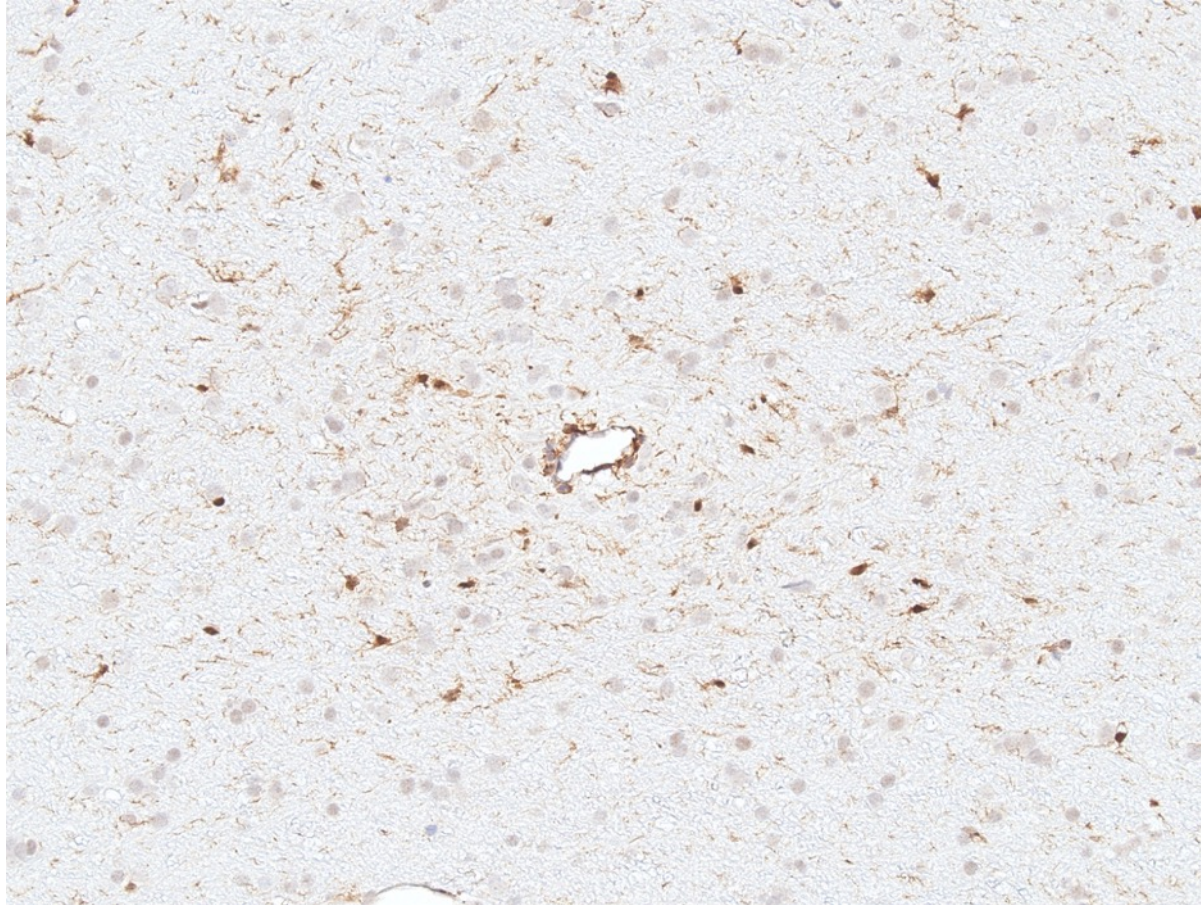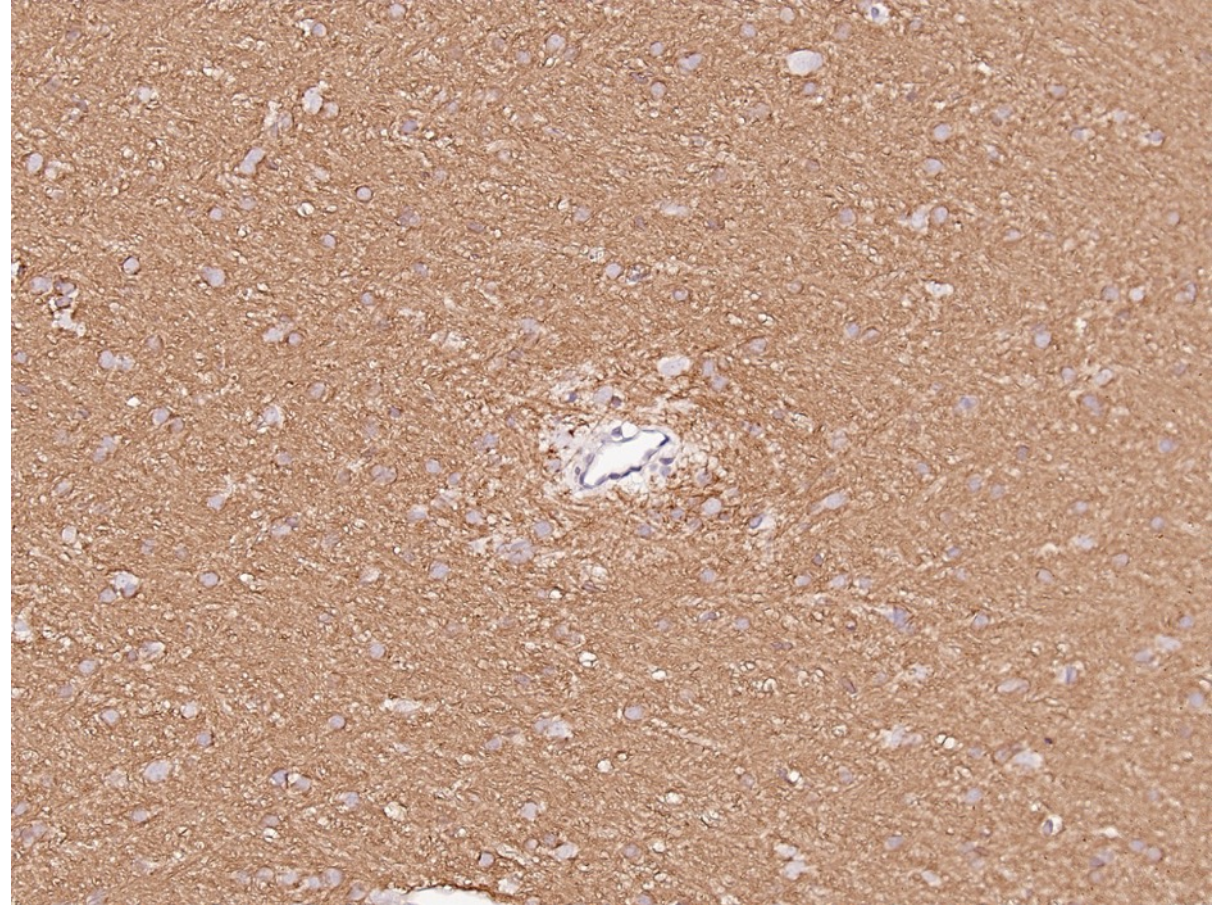

Remyelinated

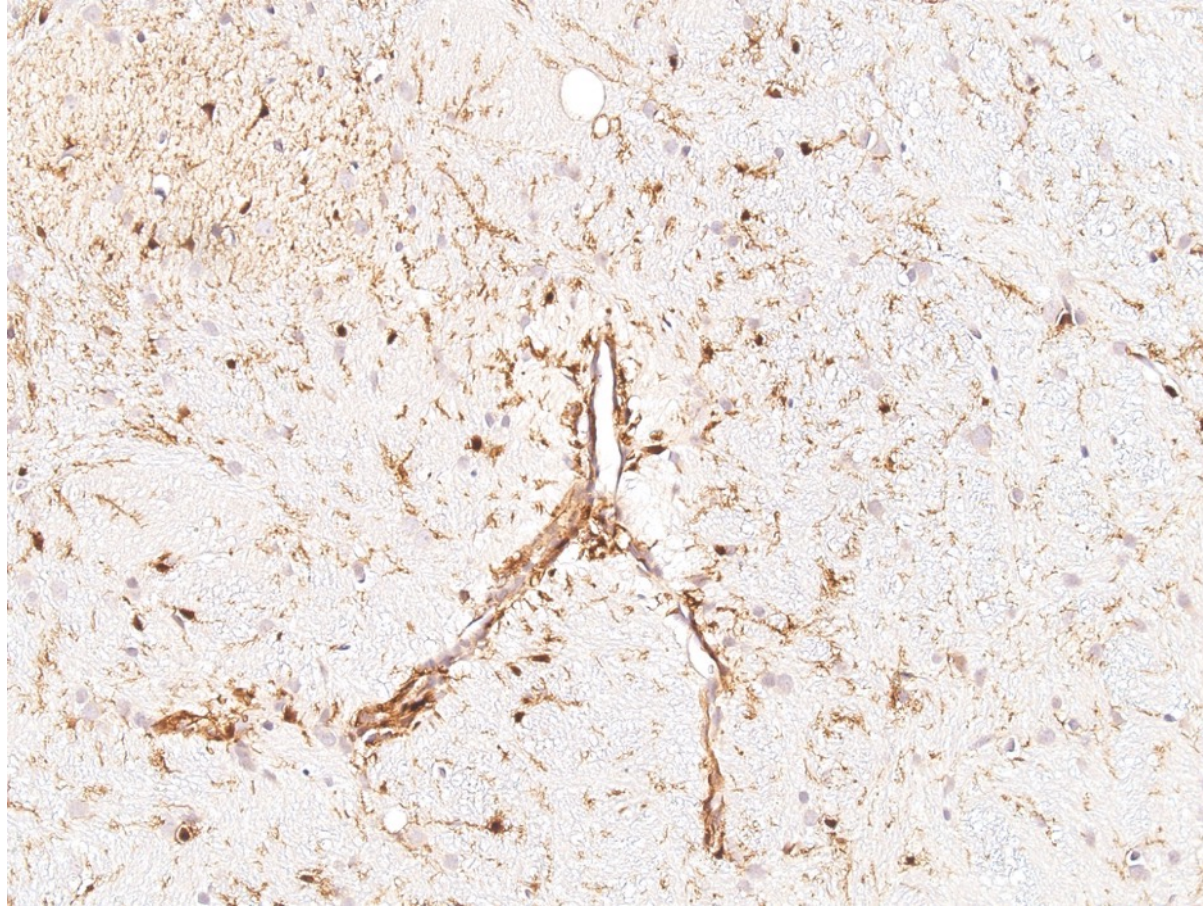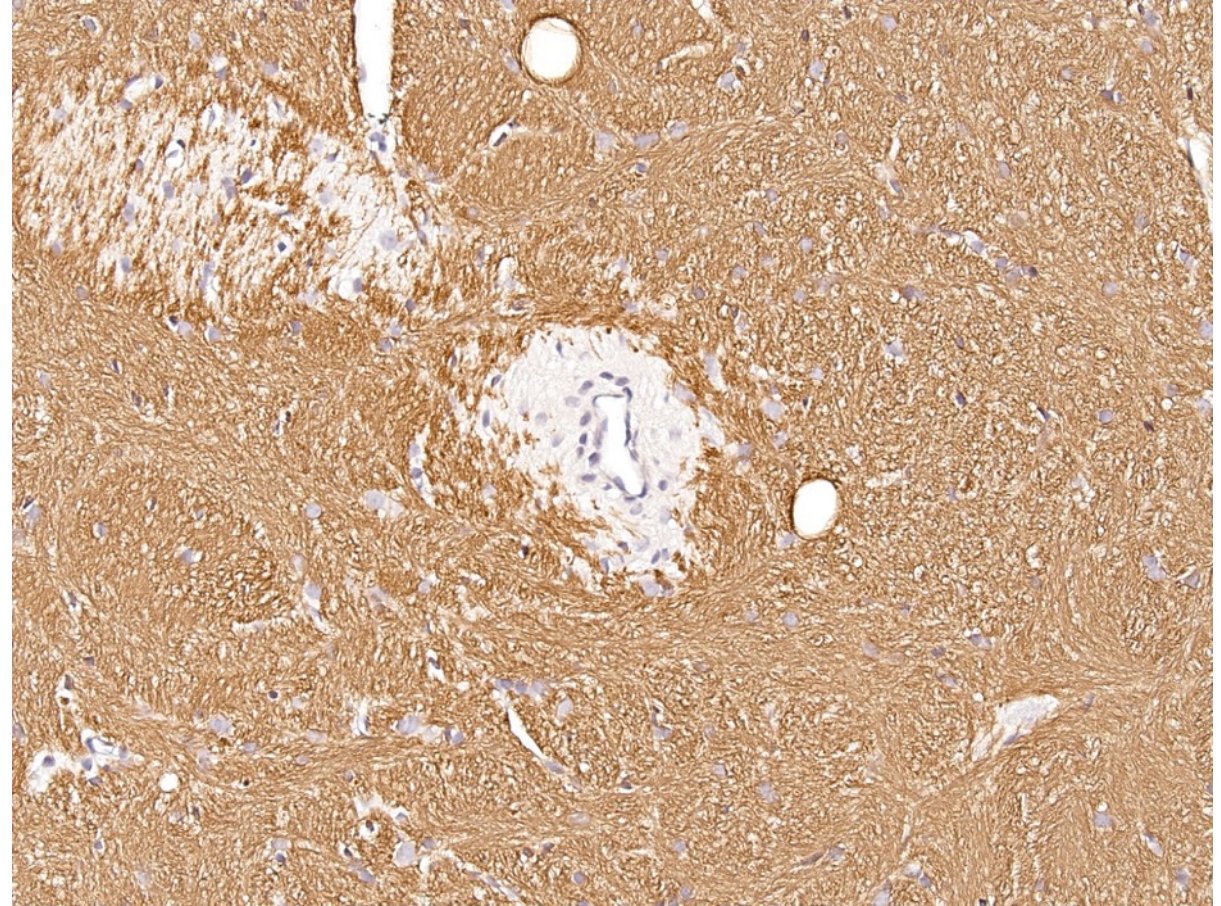

Remyelinated

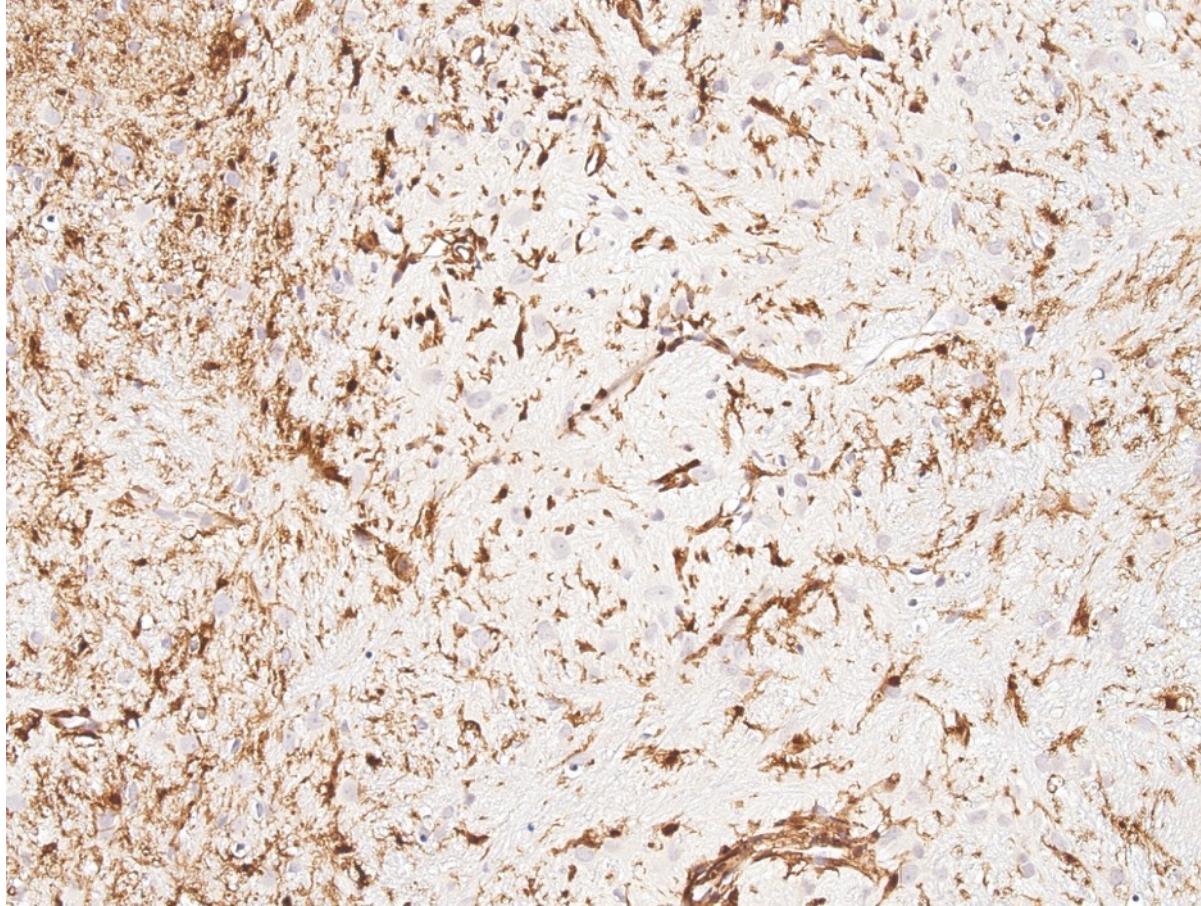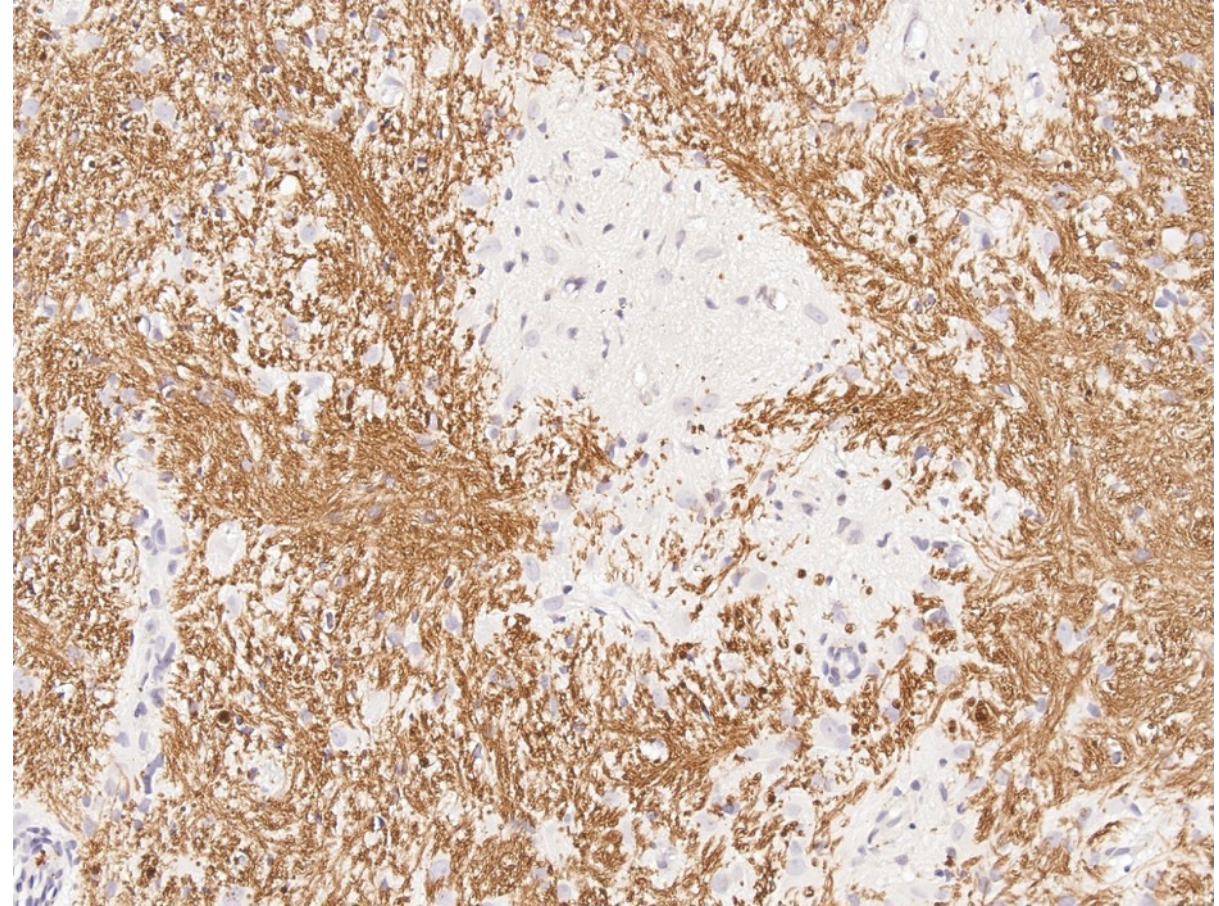

Remyelinated

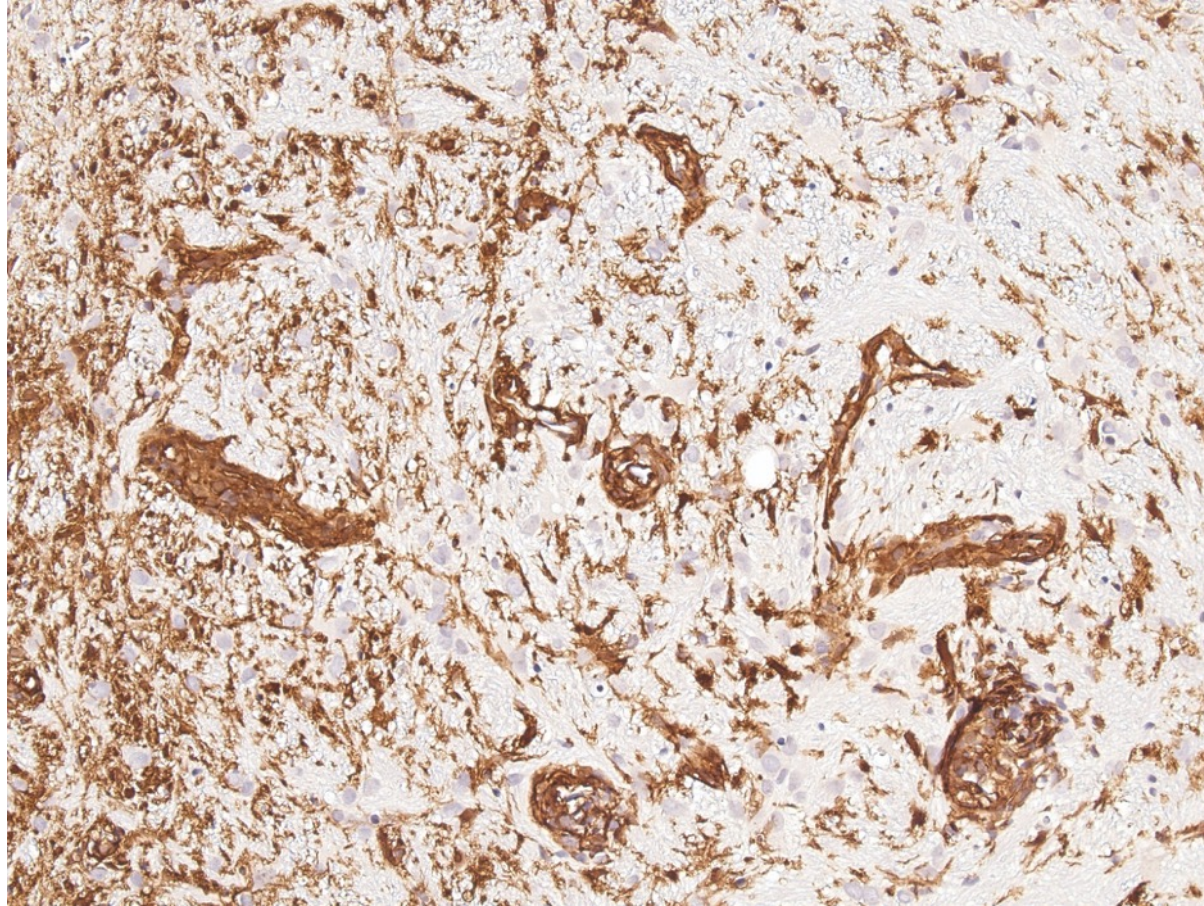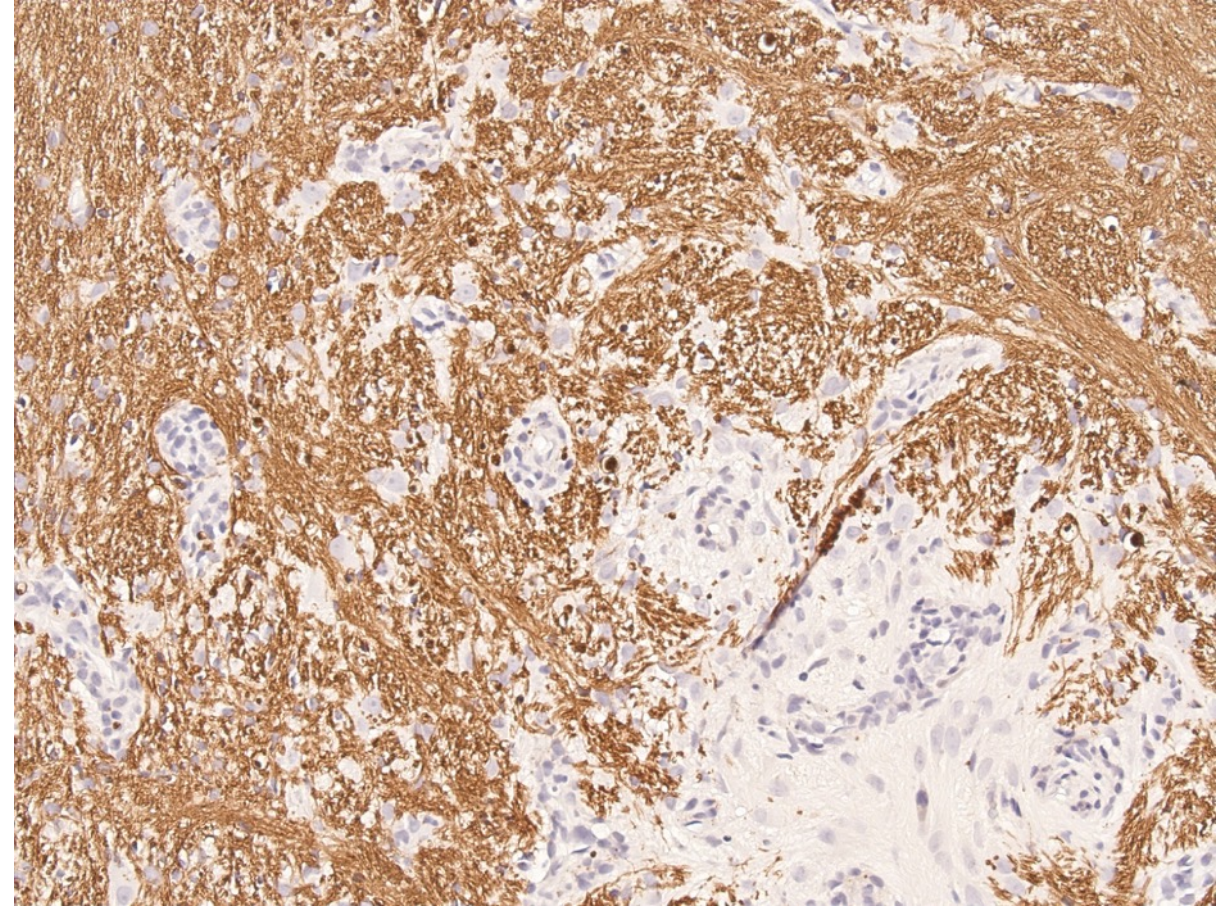

Remyelinated

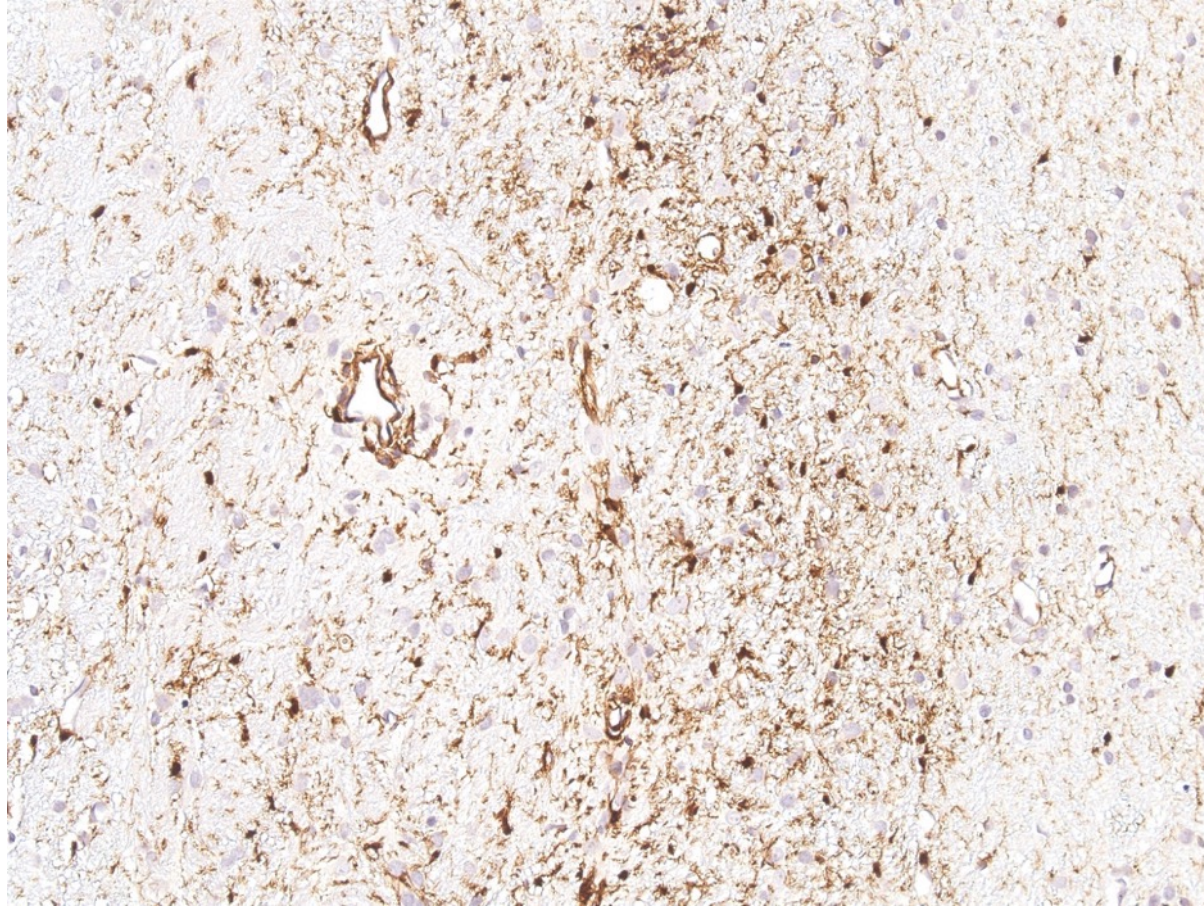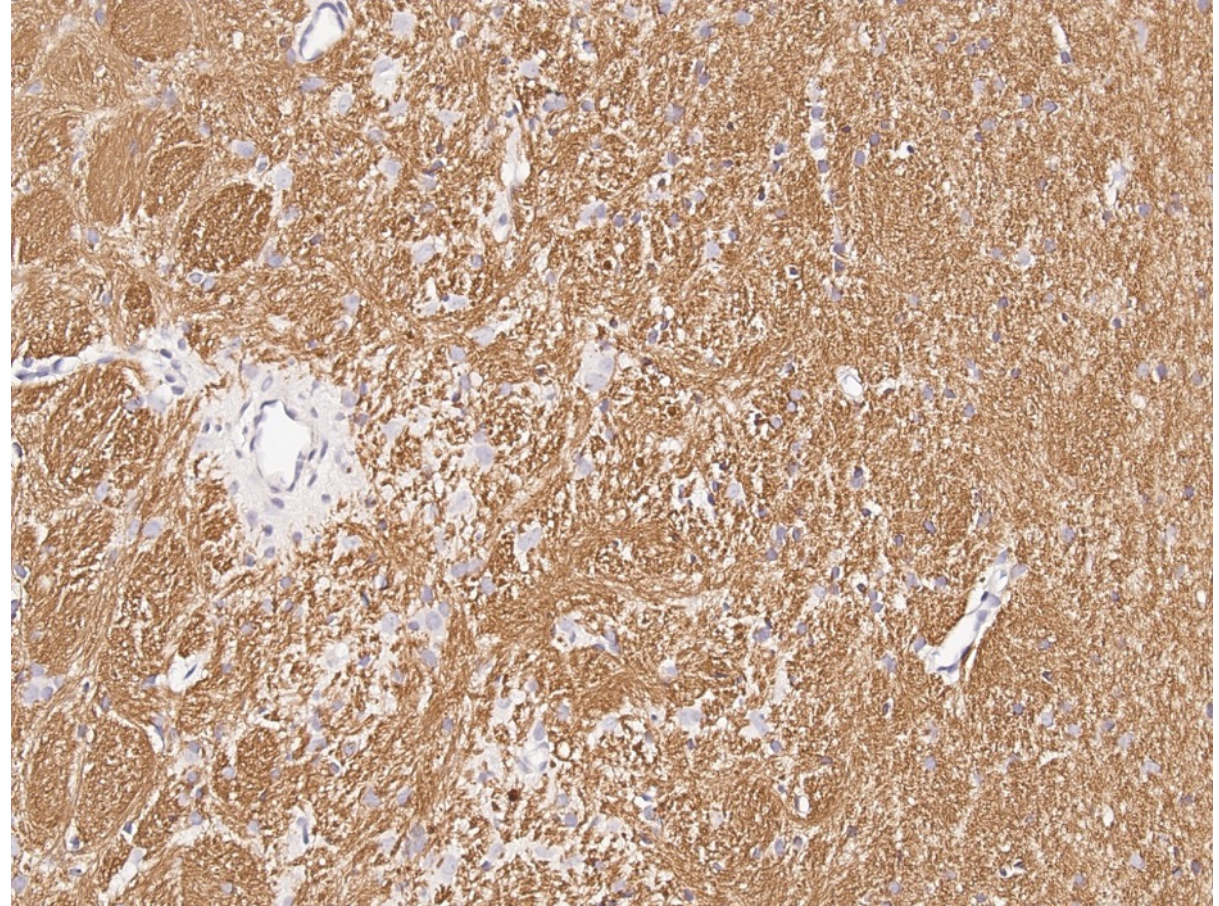

# M#3

- 1 Chronic Demyelinated
- 5 Remyelinated

Chronic Demyelinated

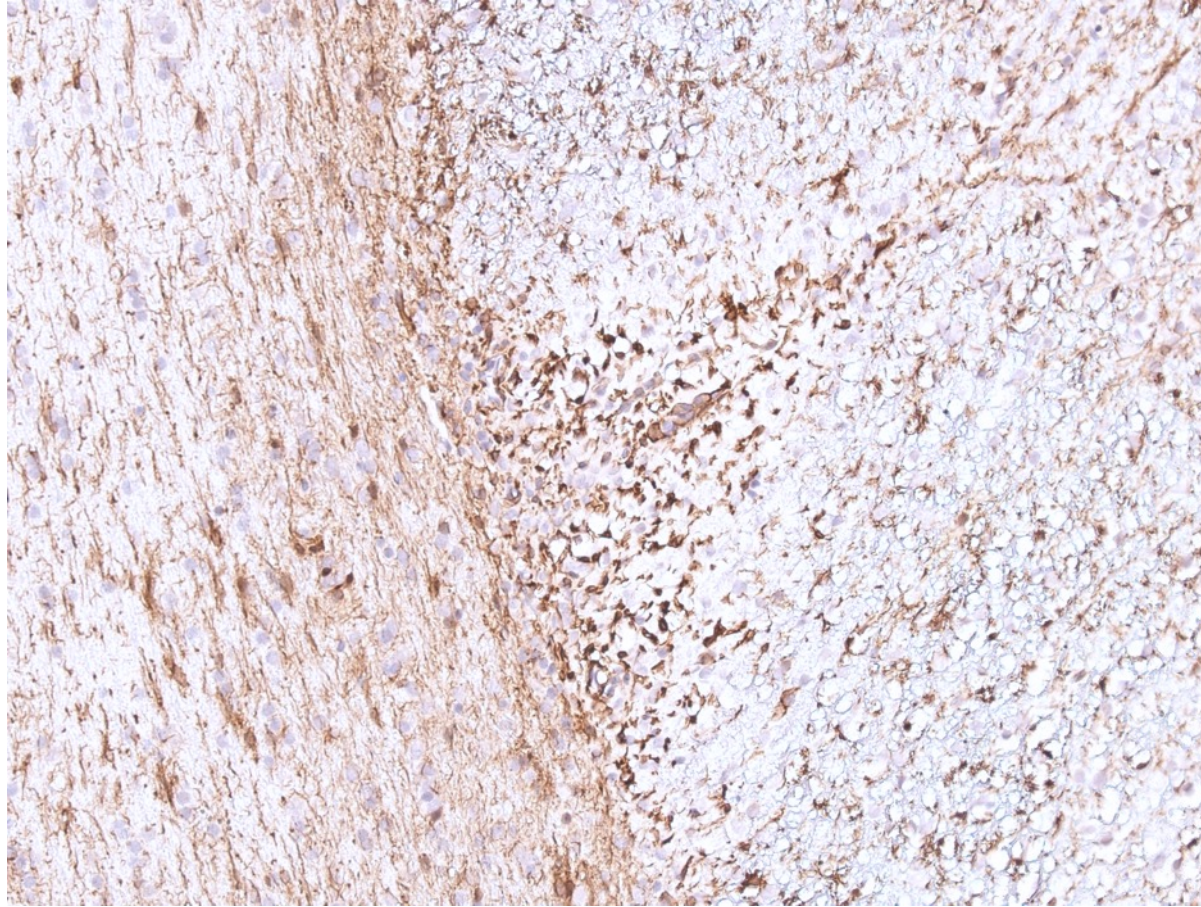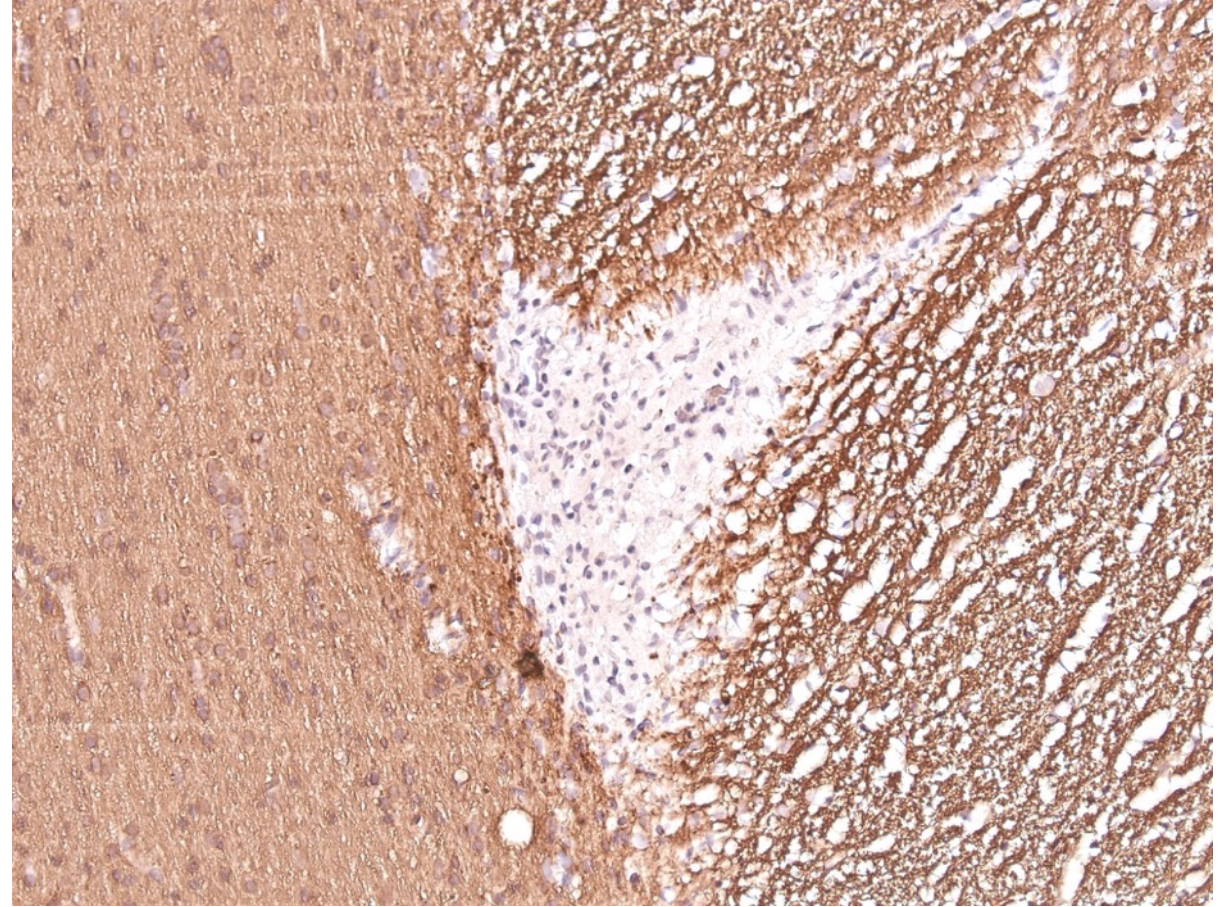

Remyelinated

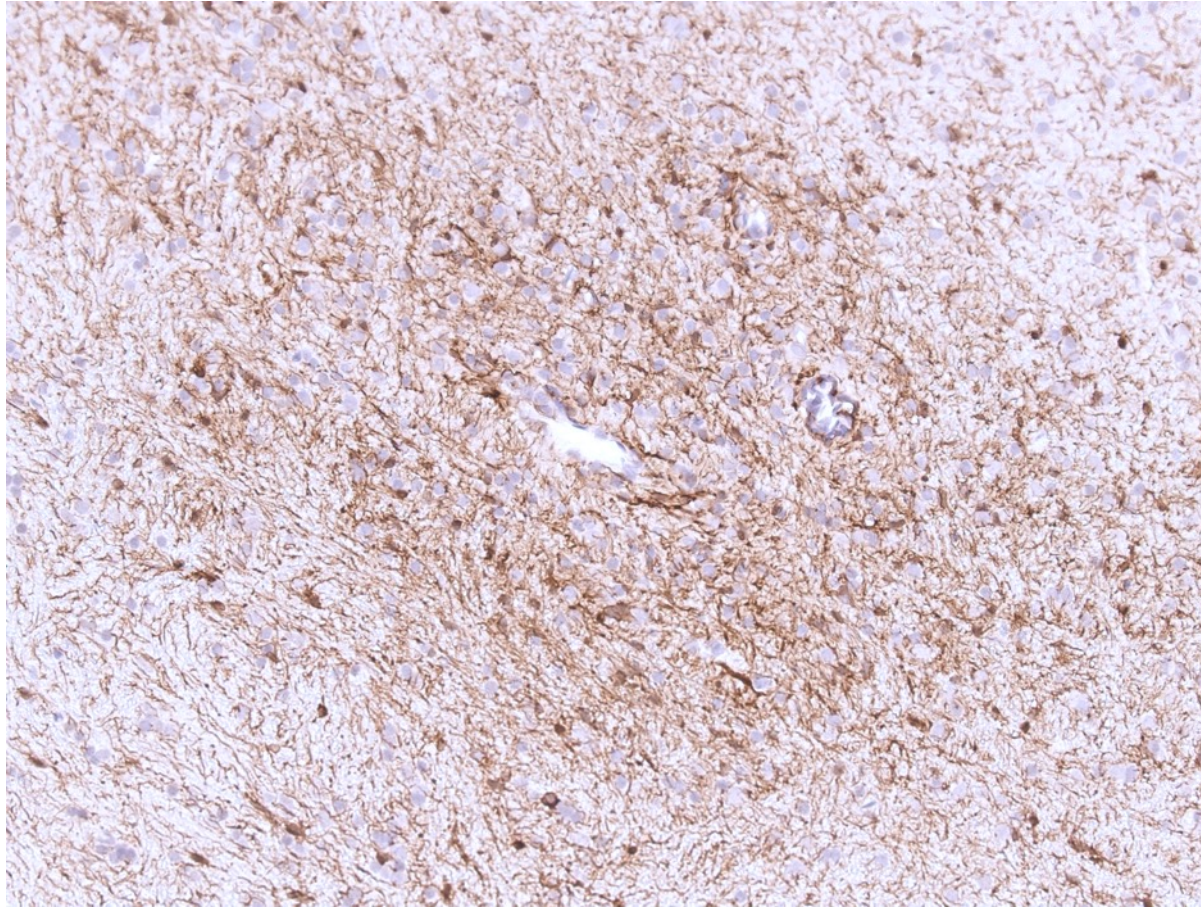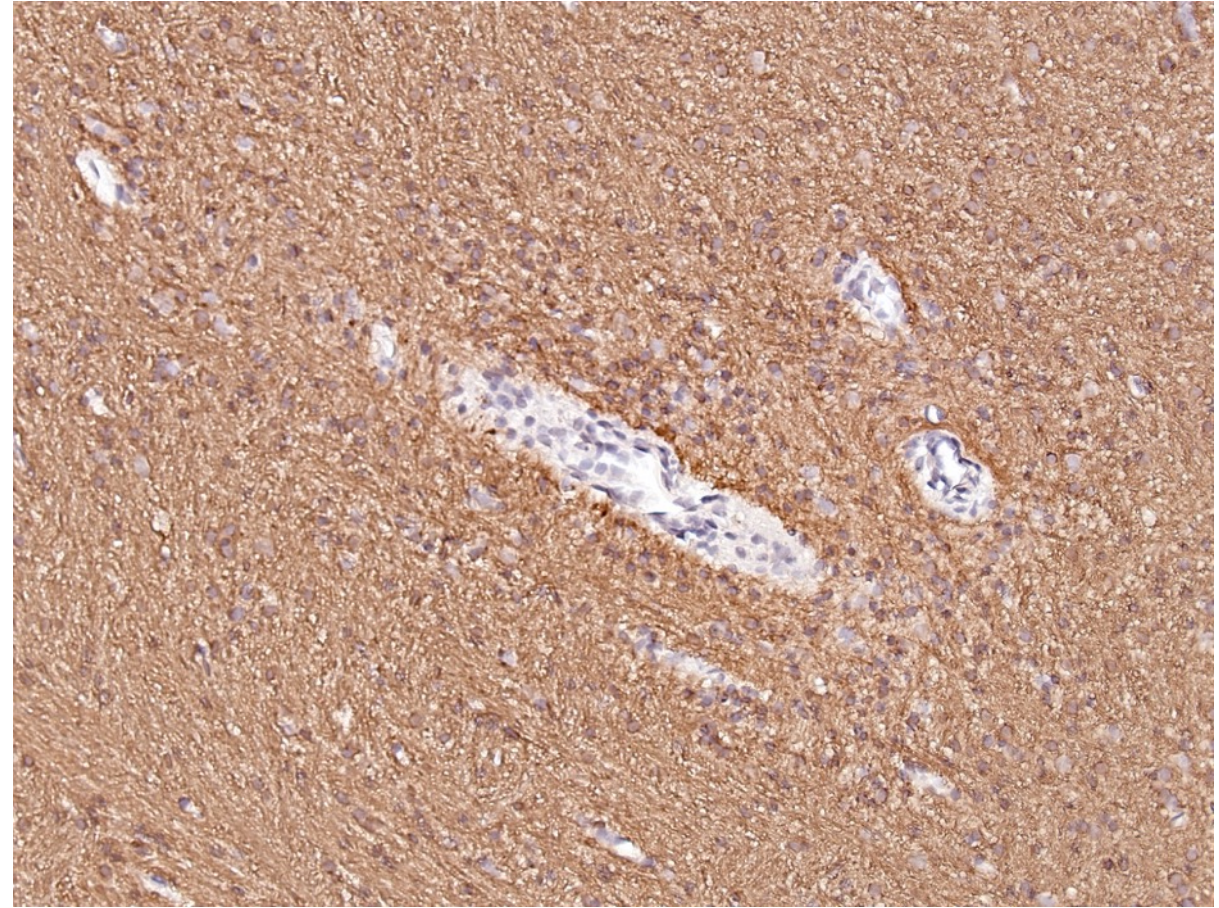

Remyelinated

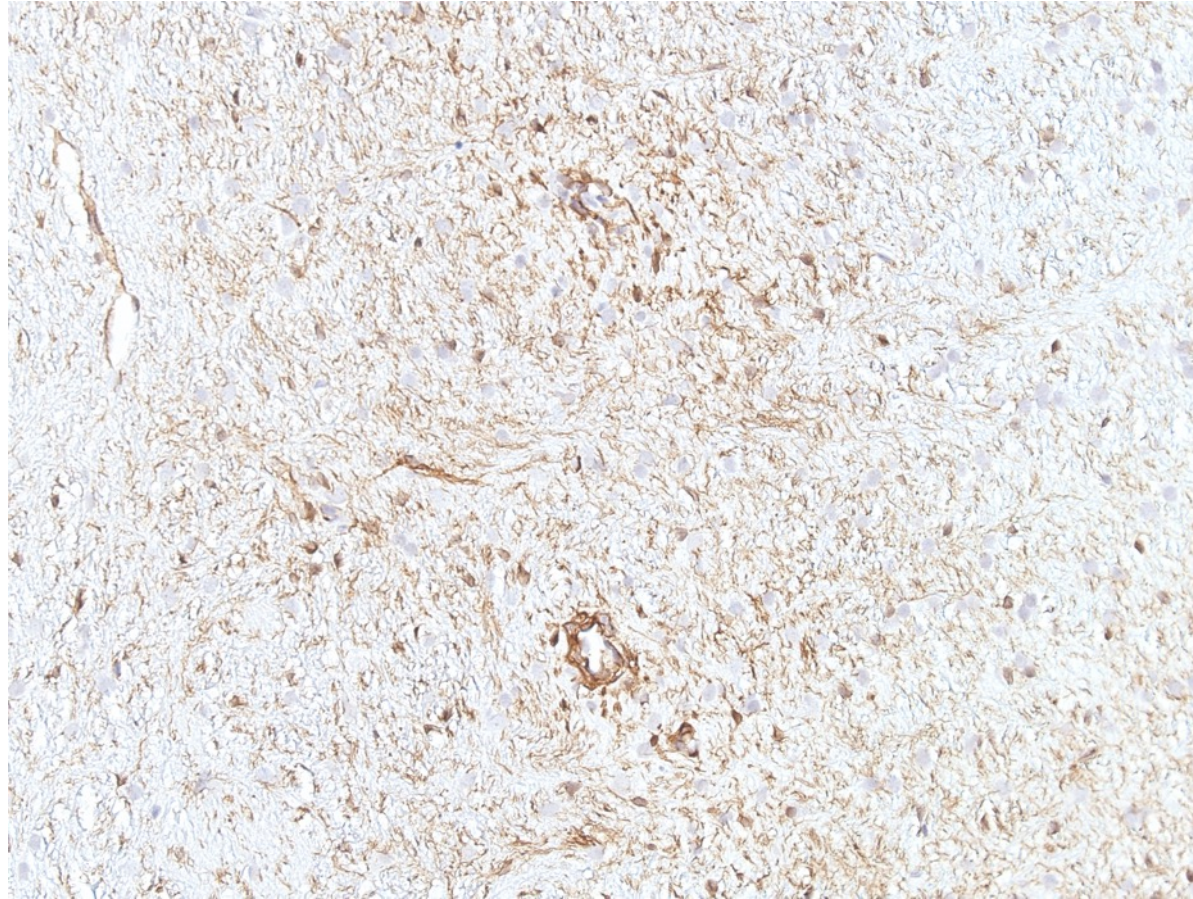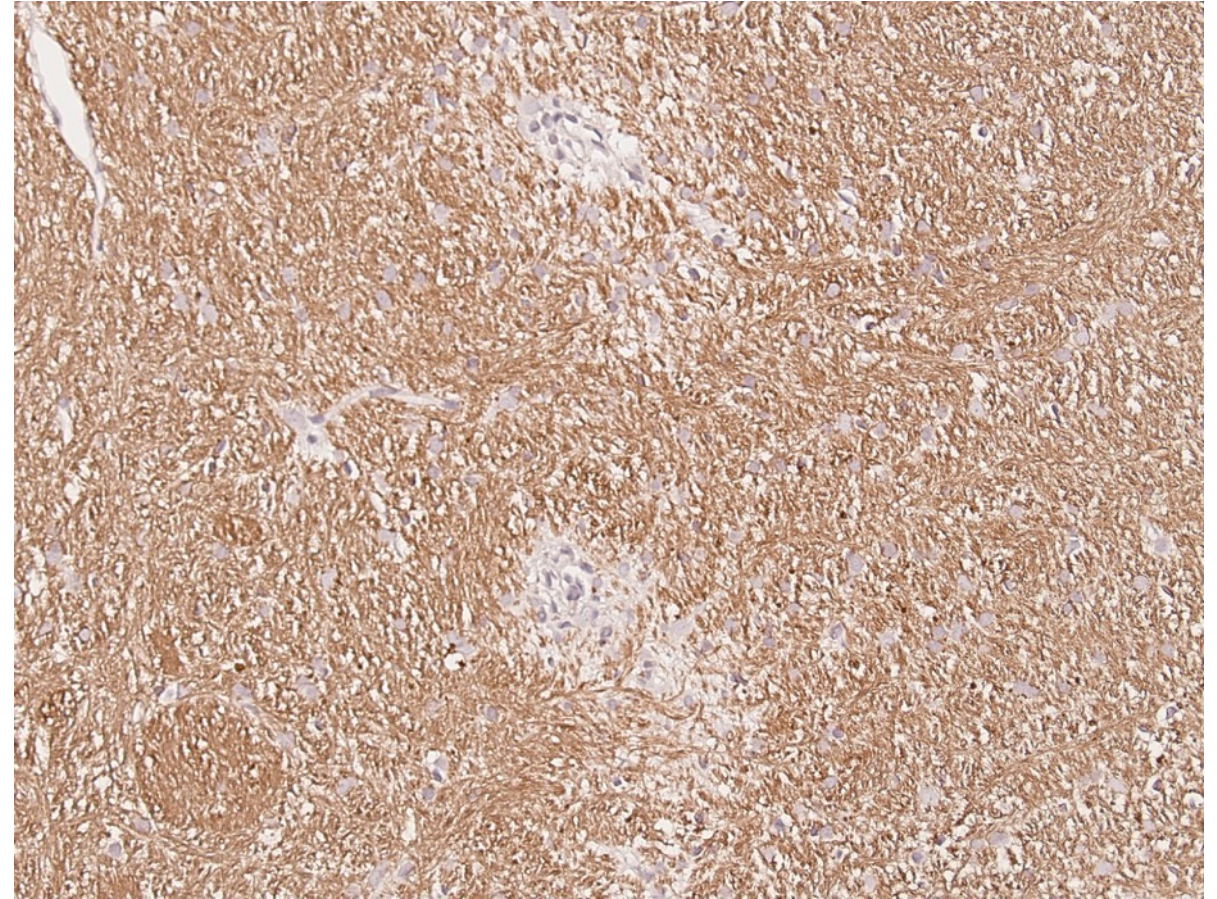

Remyelinated

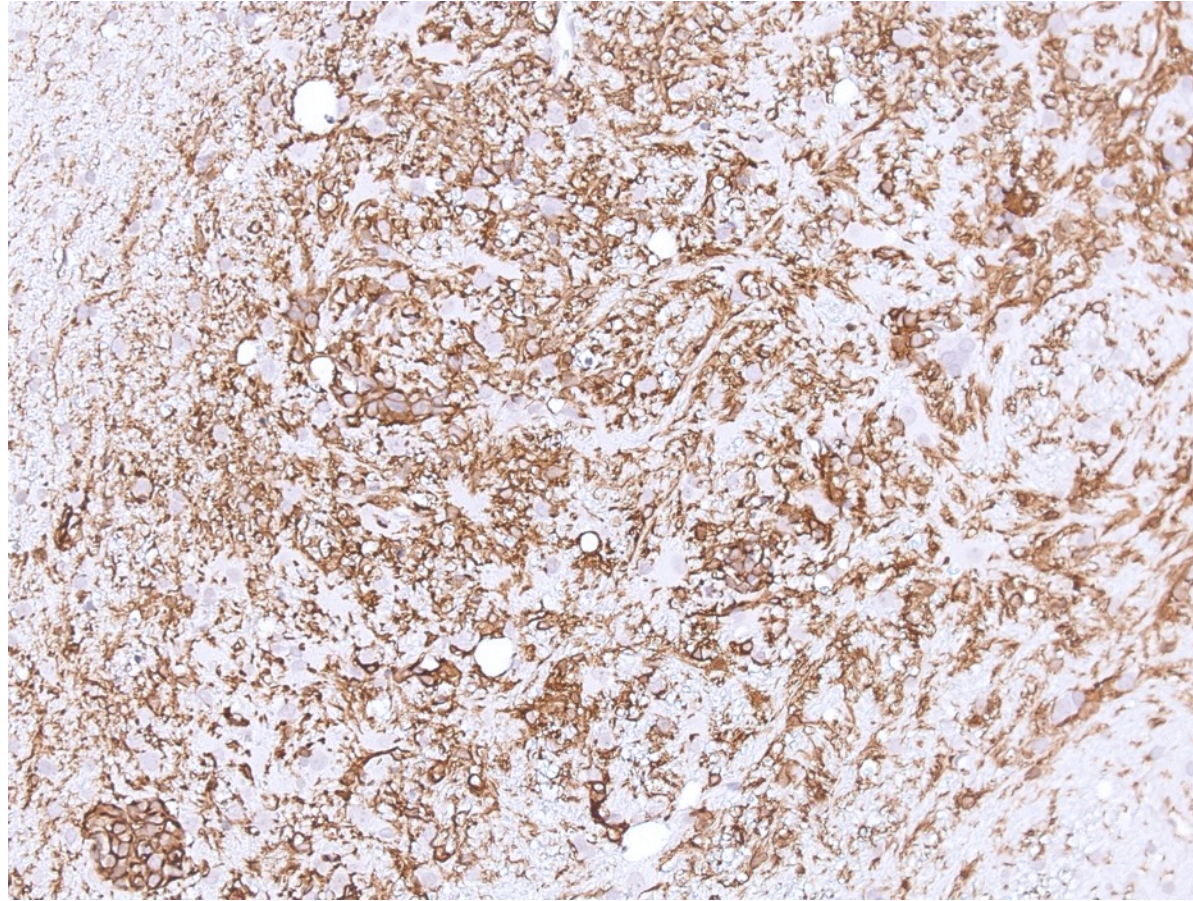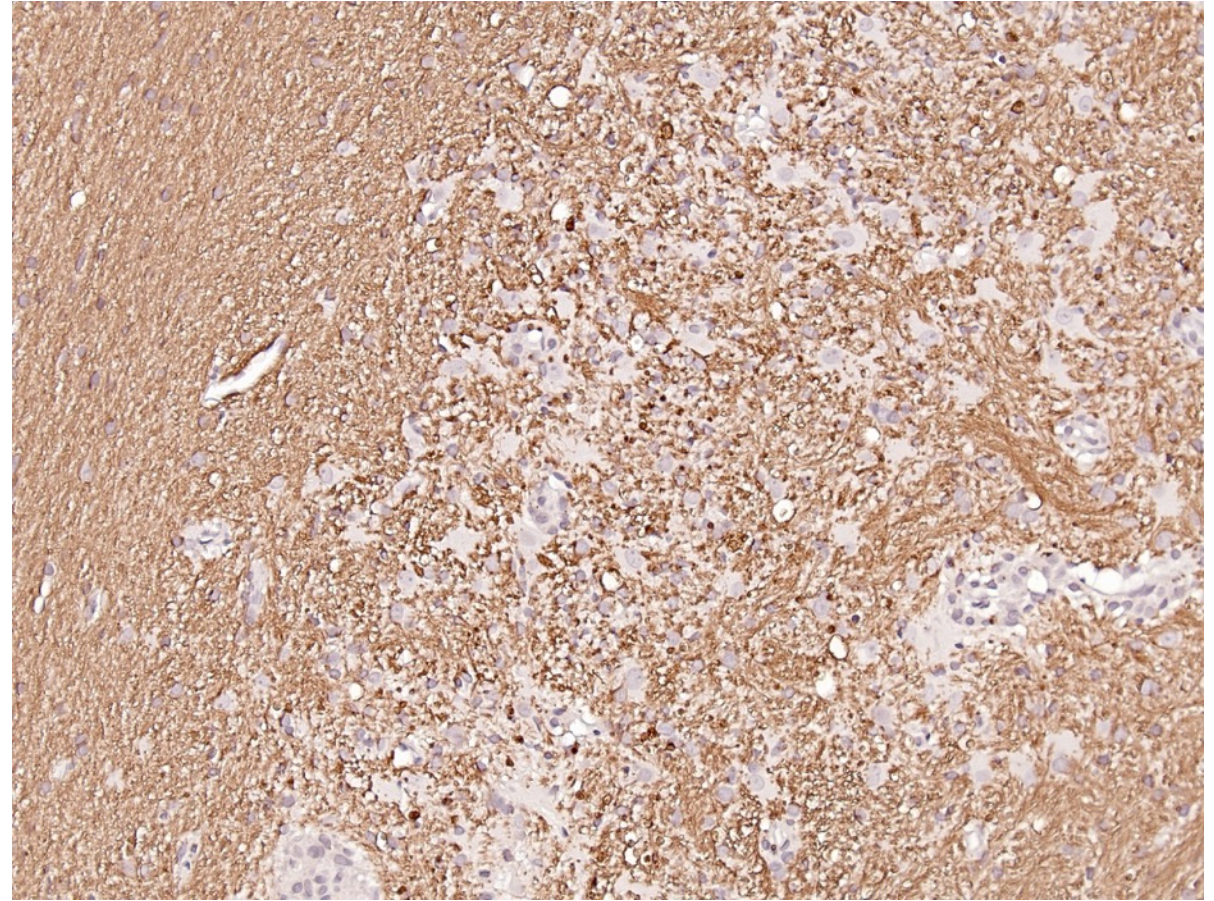

Remyelinated

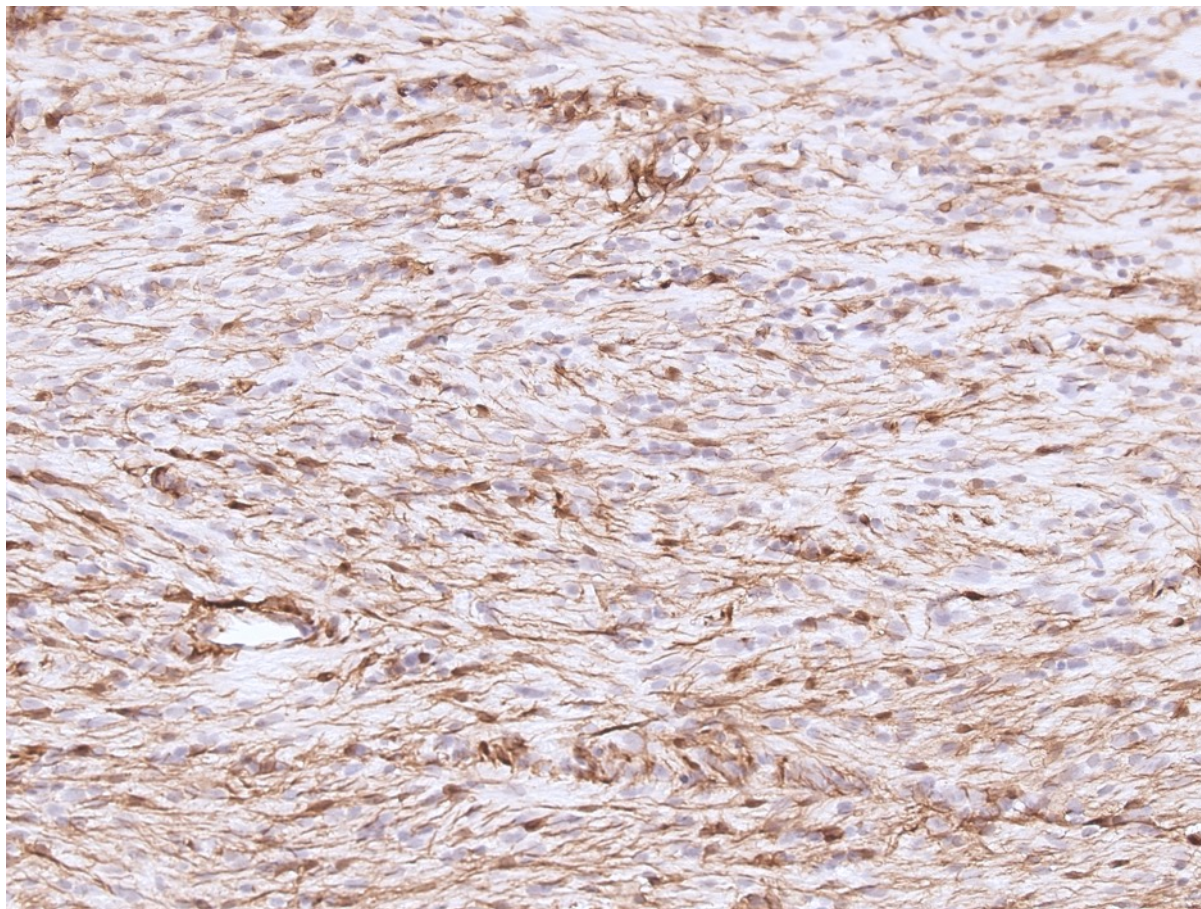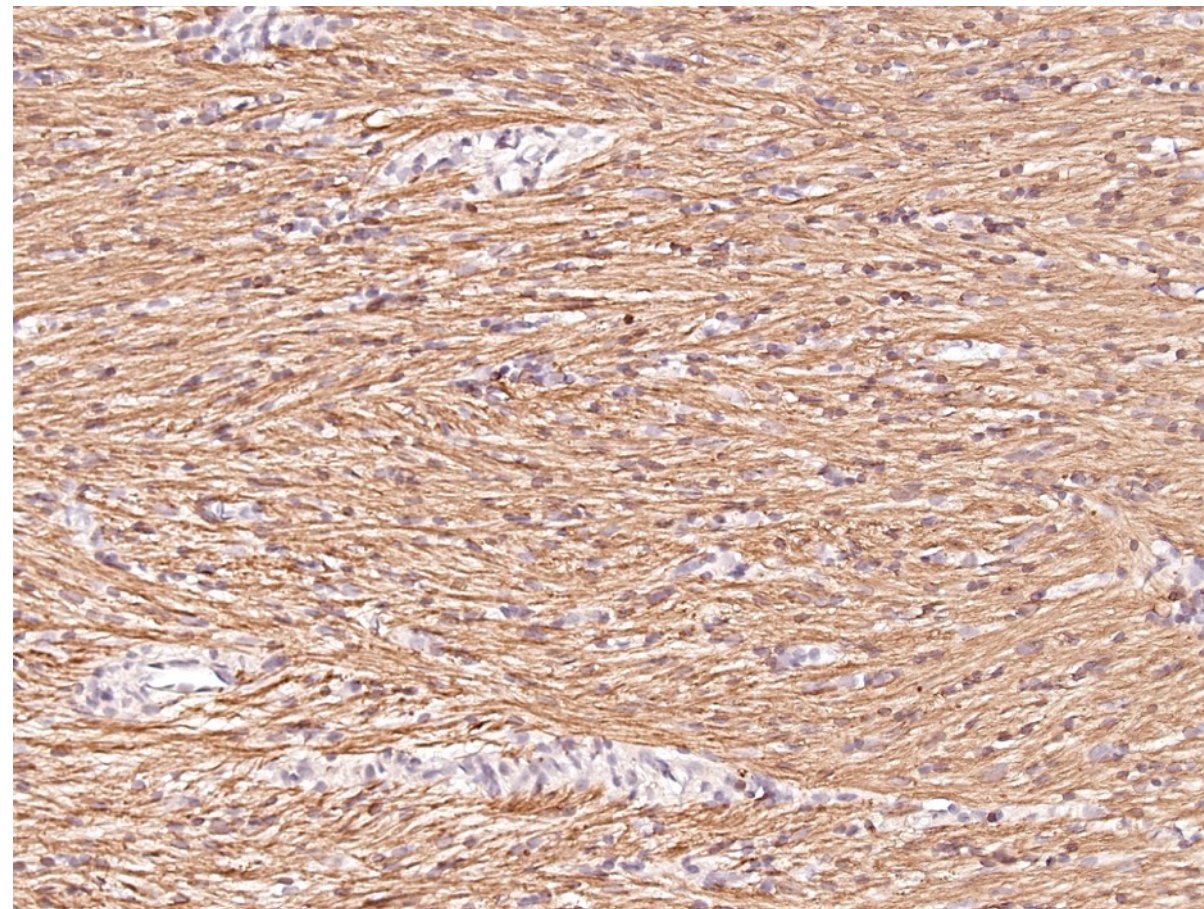

Remyelinated

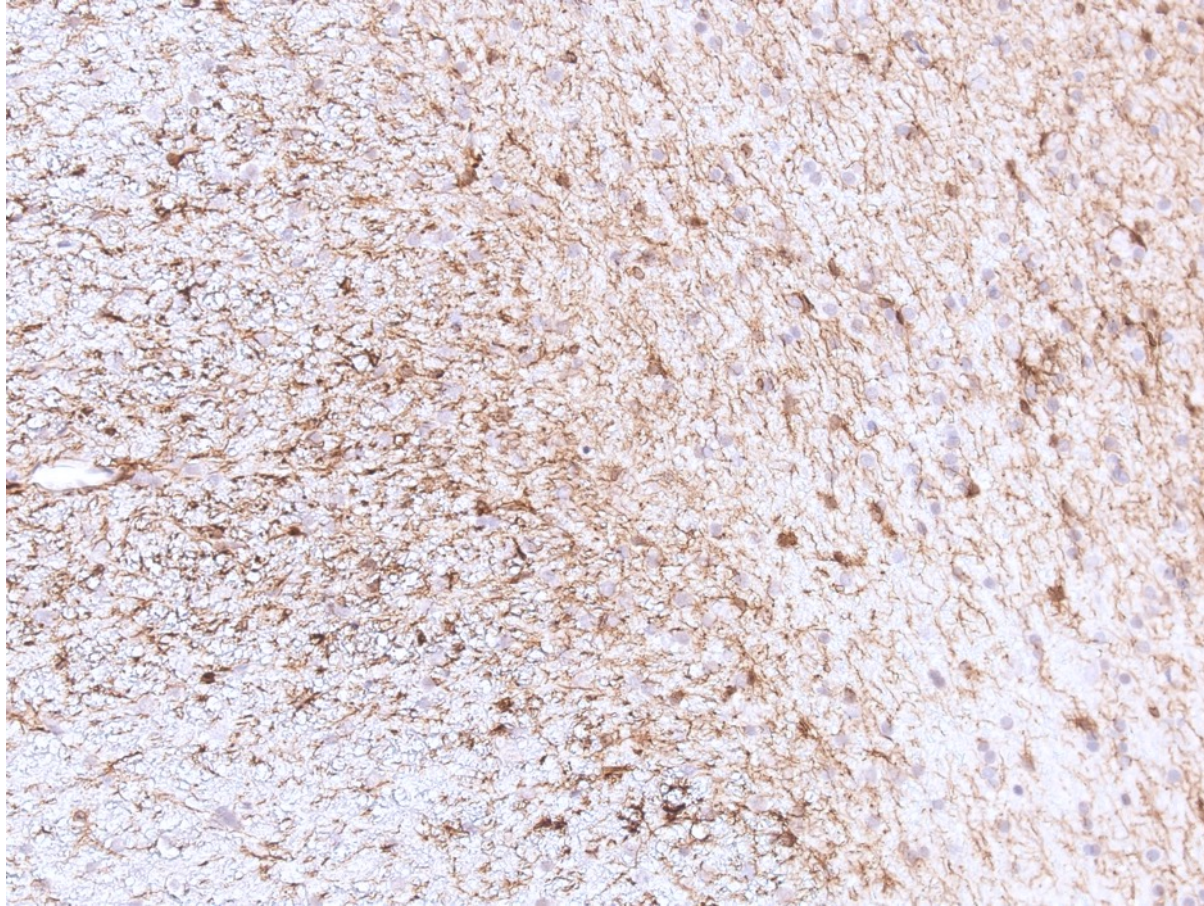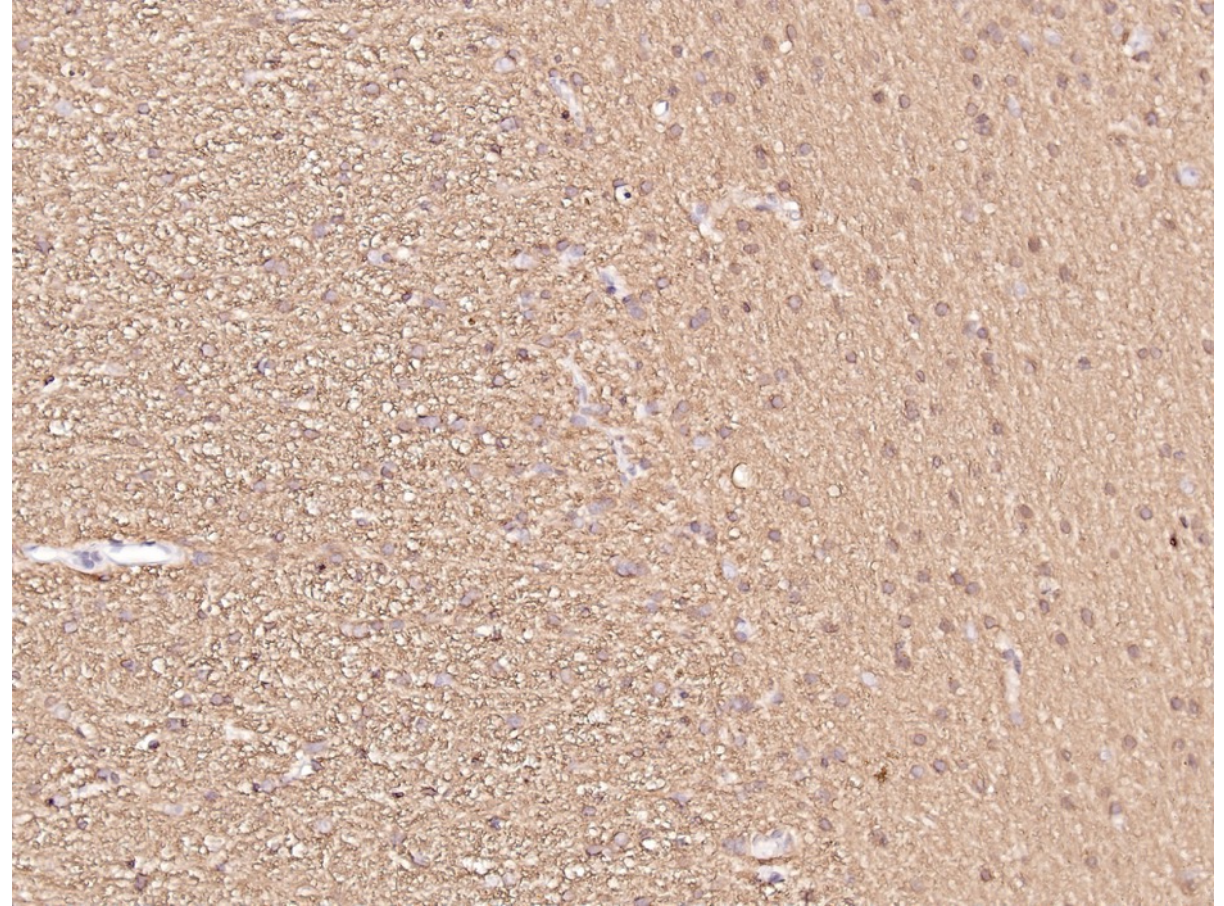

# M#4

- 1 Chronic Demyelinated
- 2 Remyelinated

Chronic Demyelinated

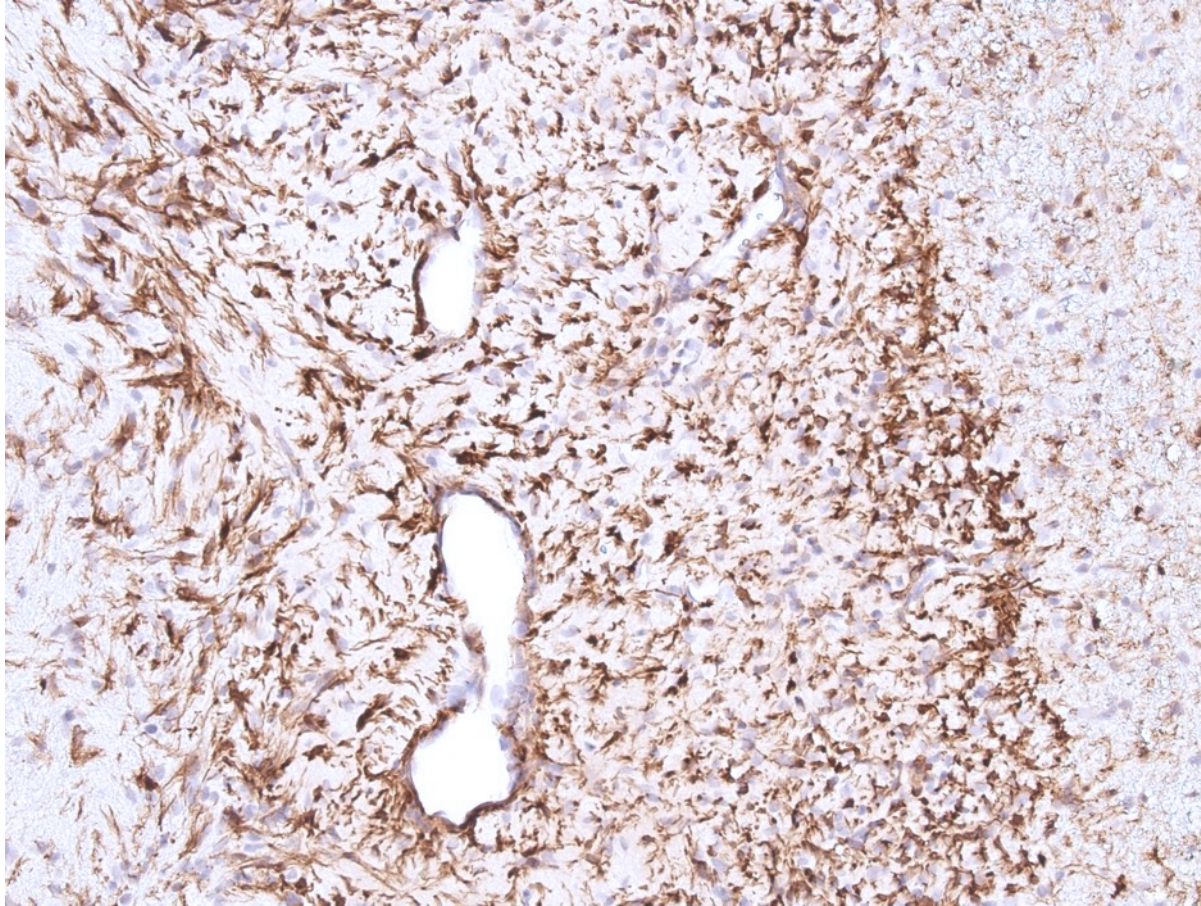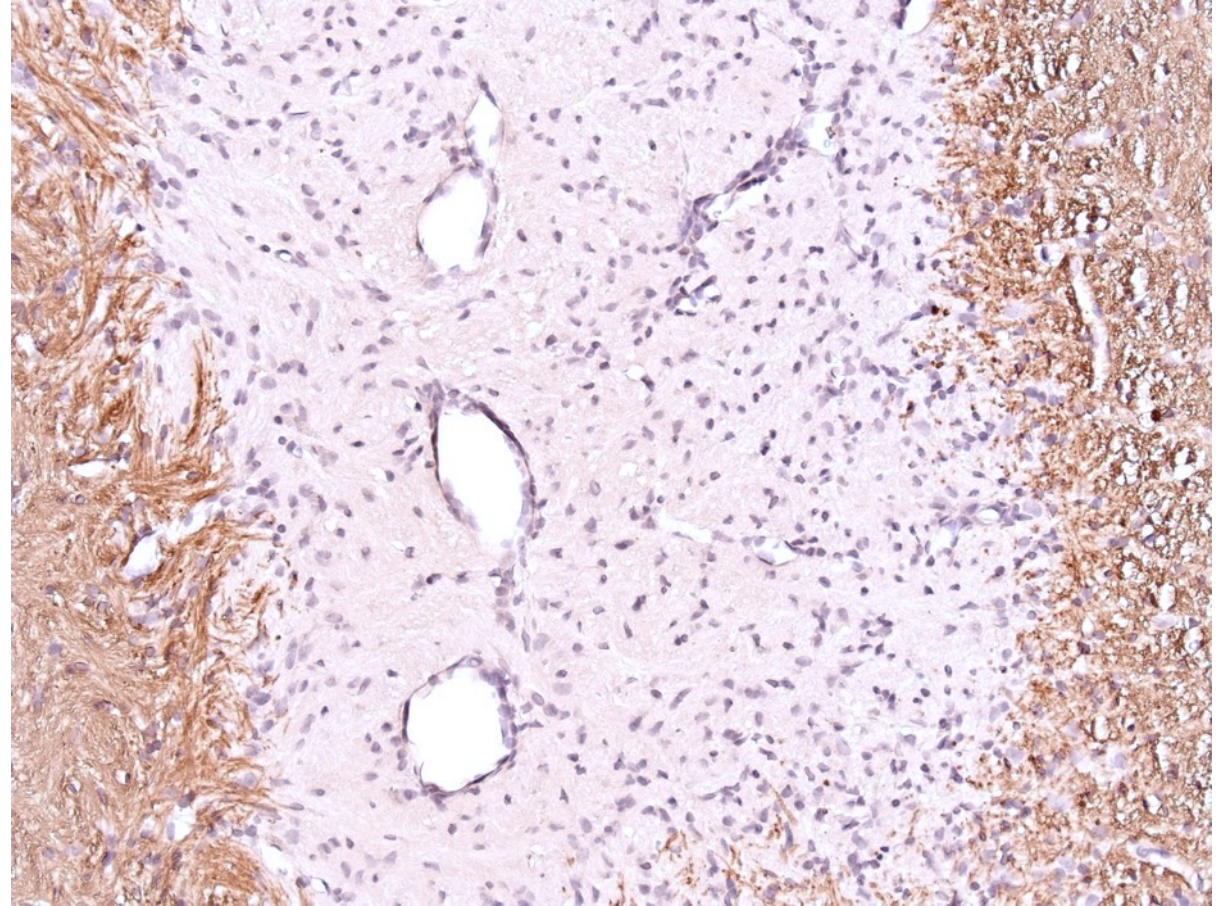

Remyelinated

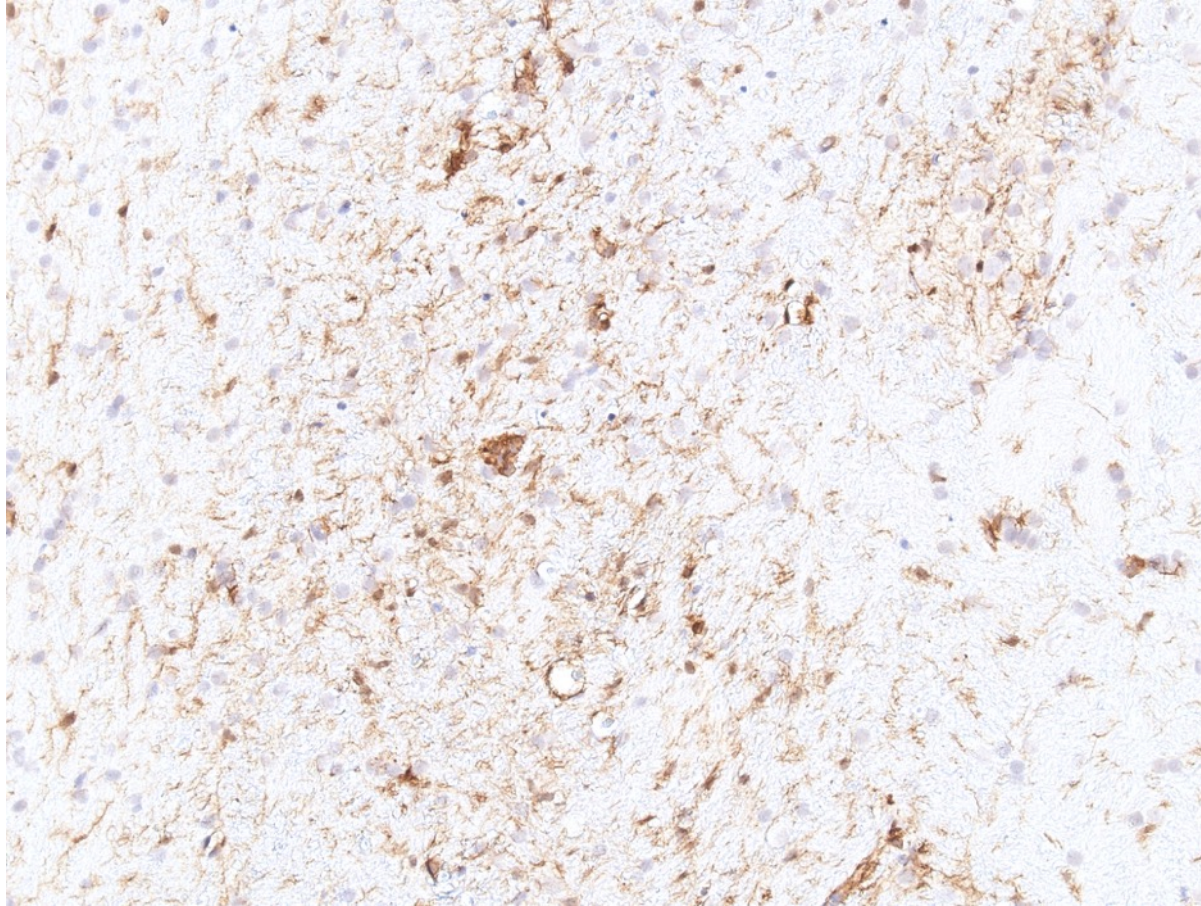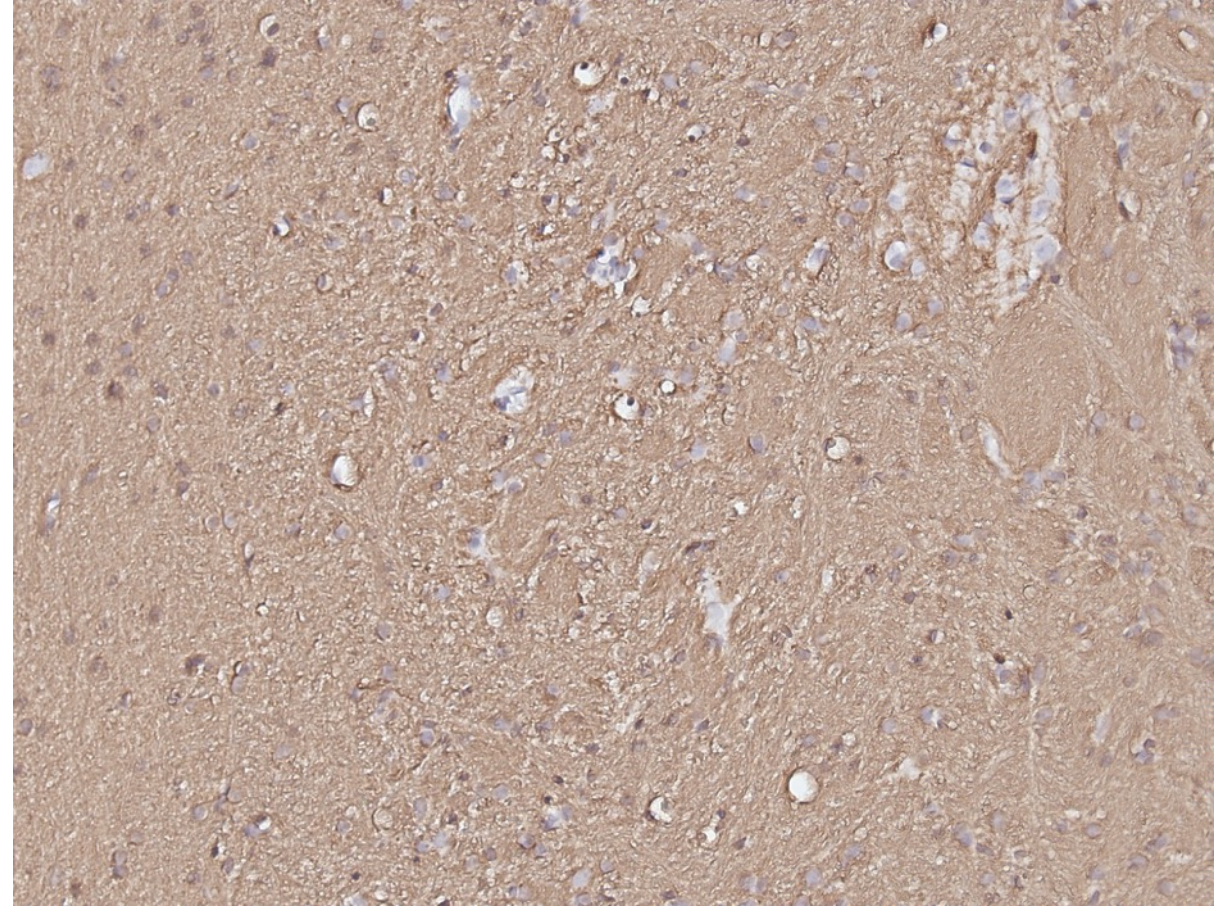

Remyelinated

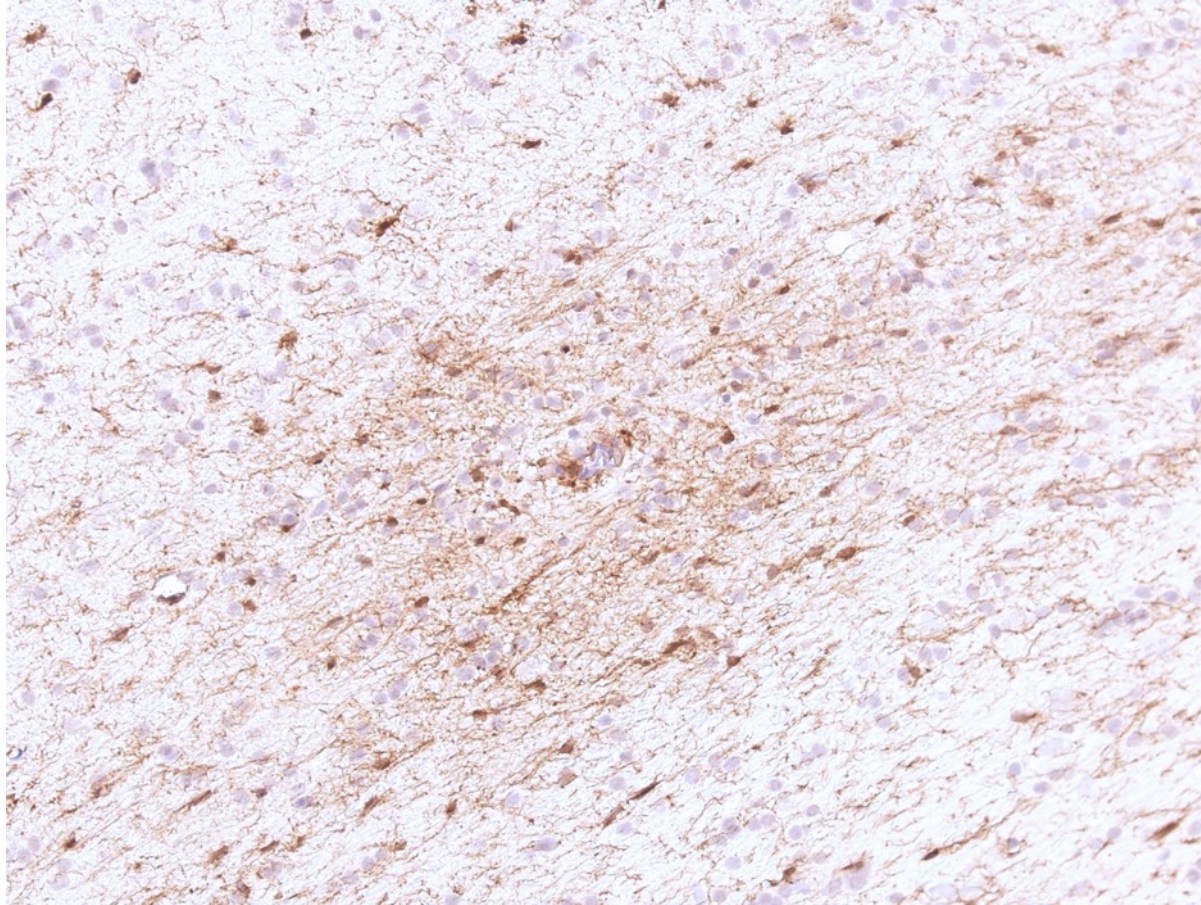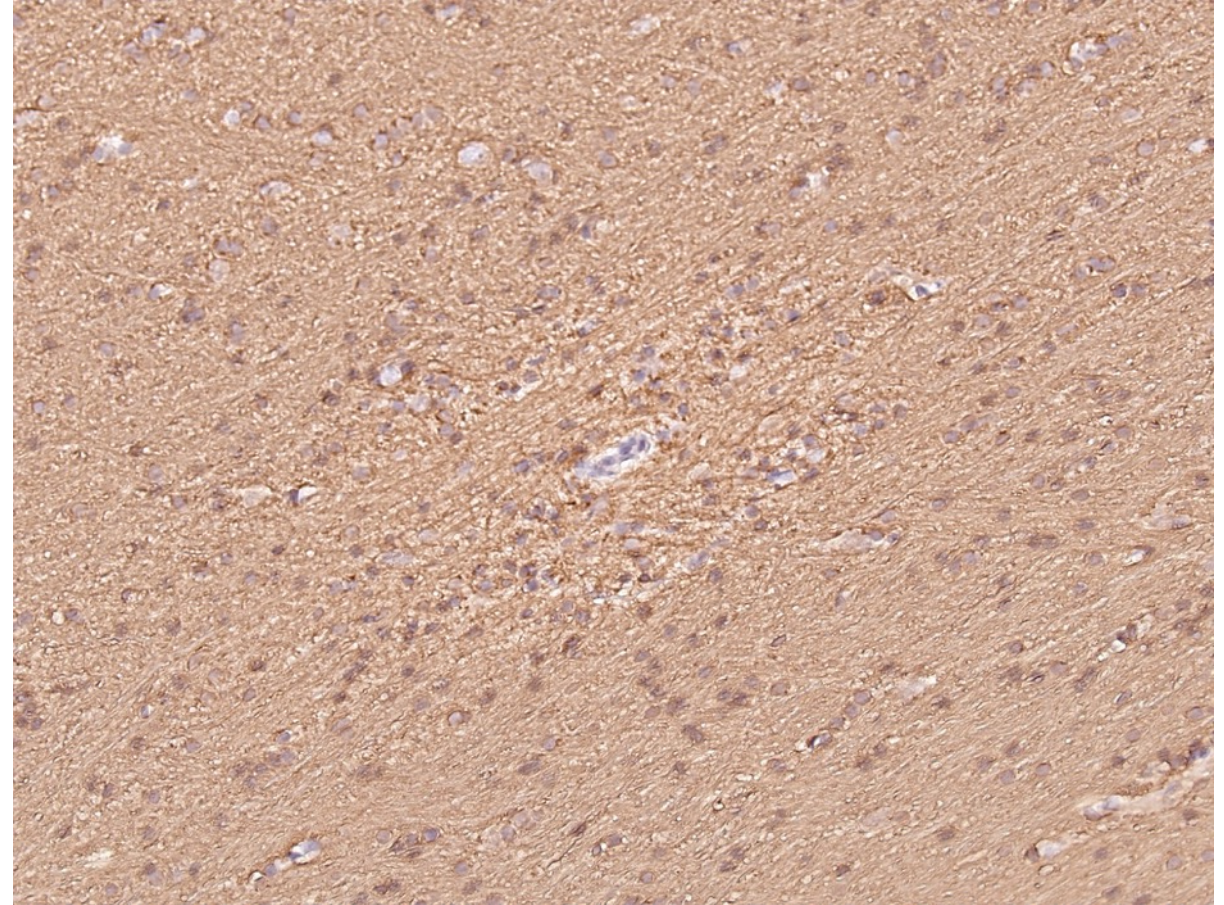

# M#5

- 4 Acute Demyelinating
- 4 Chronic Demyelinated
- 1 Remyelinated

# Acute Demyelinating

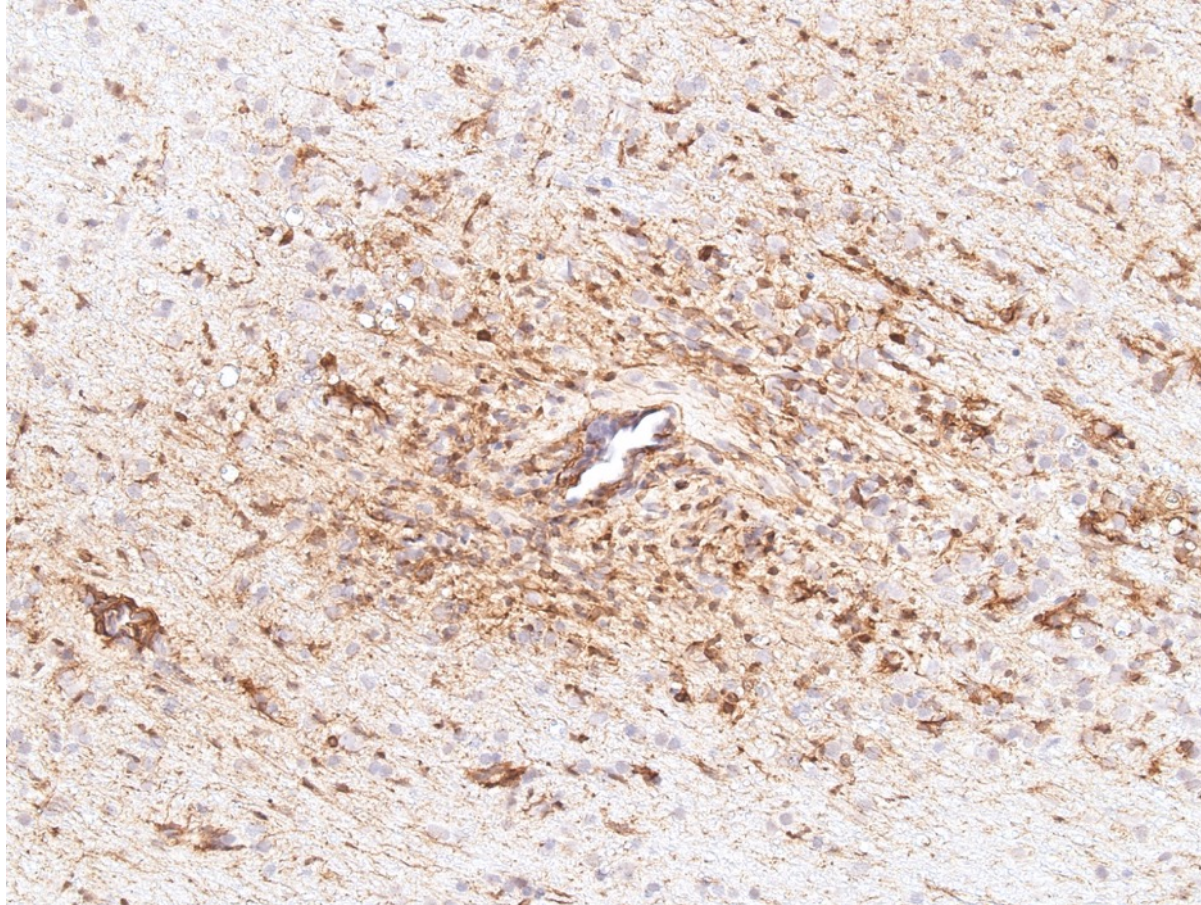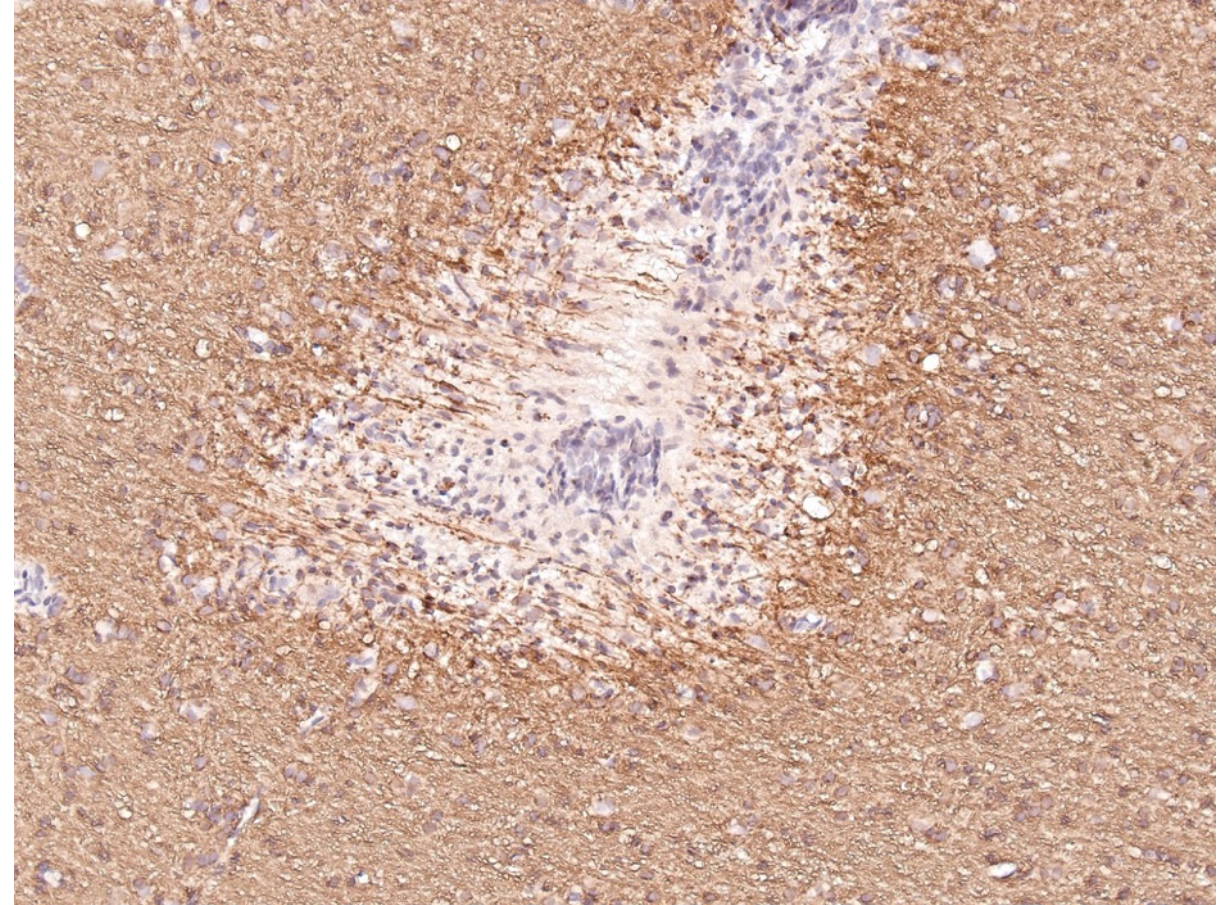

# Acute Demyelinating

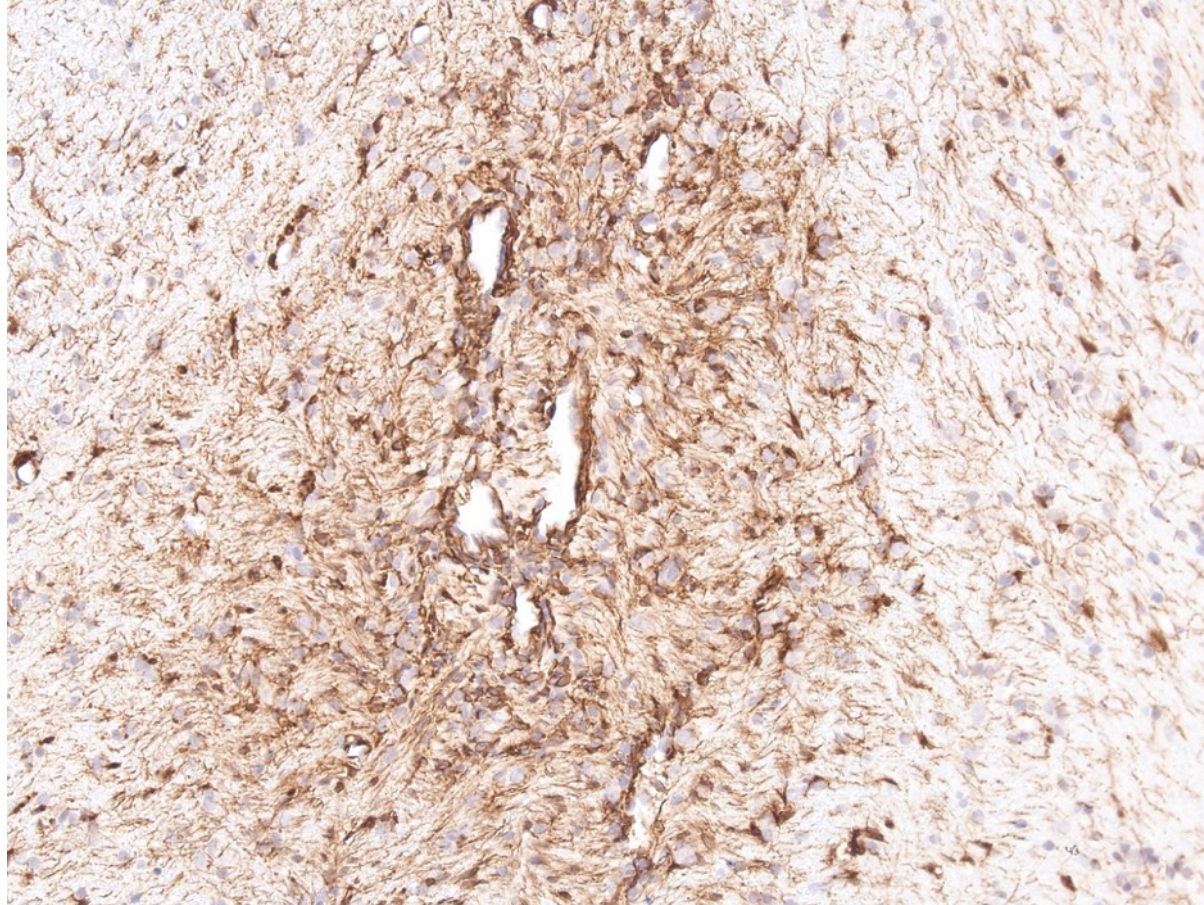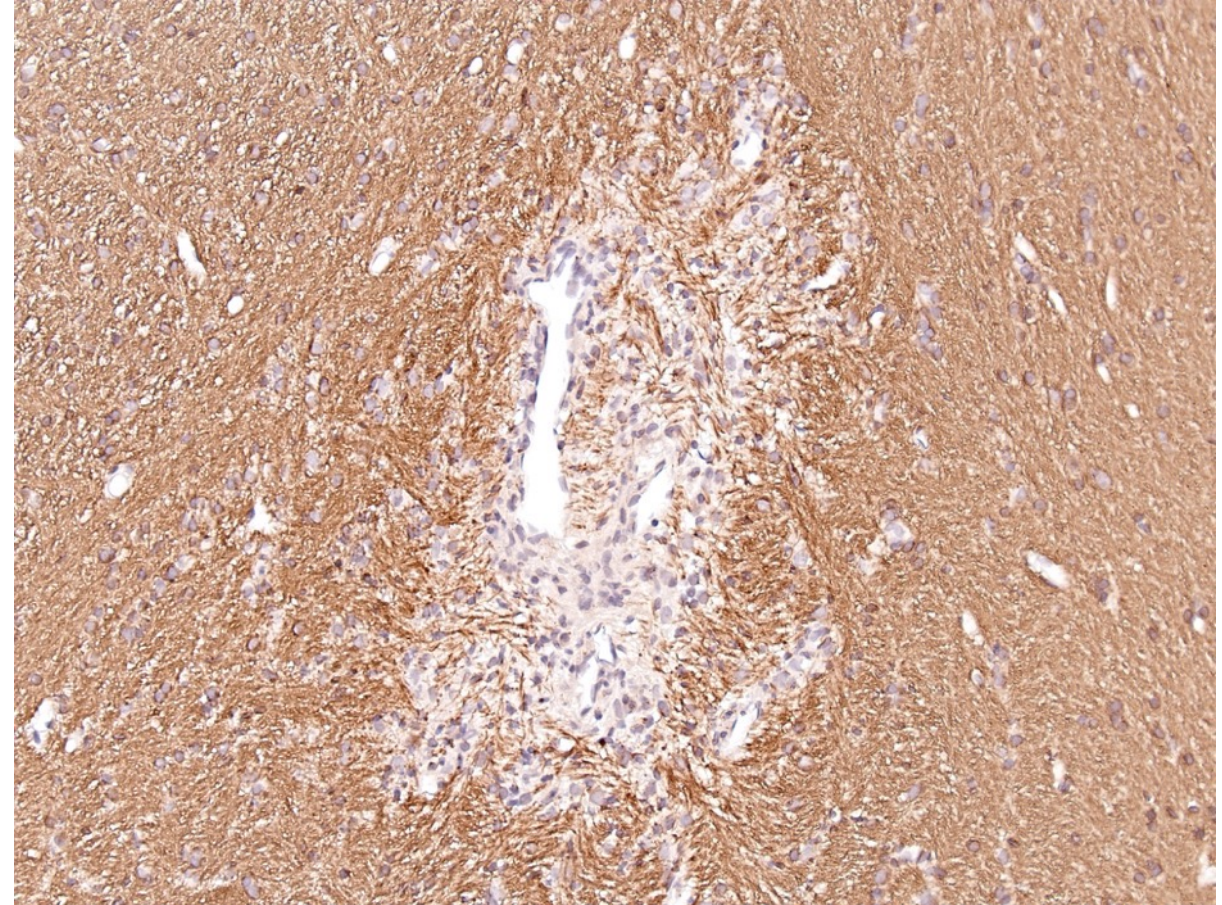

# Acute Demyelinating

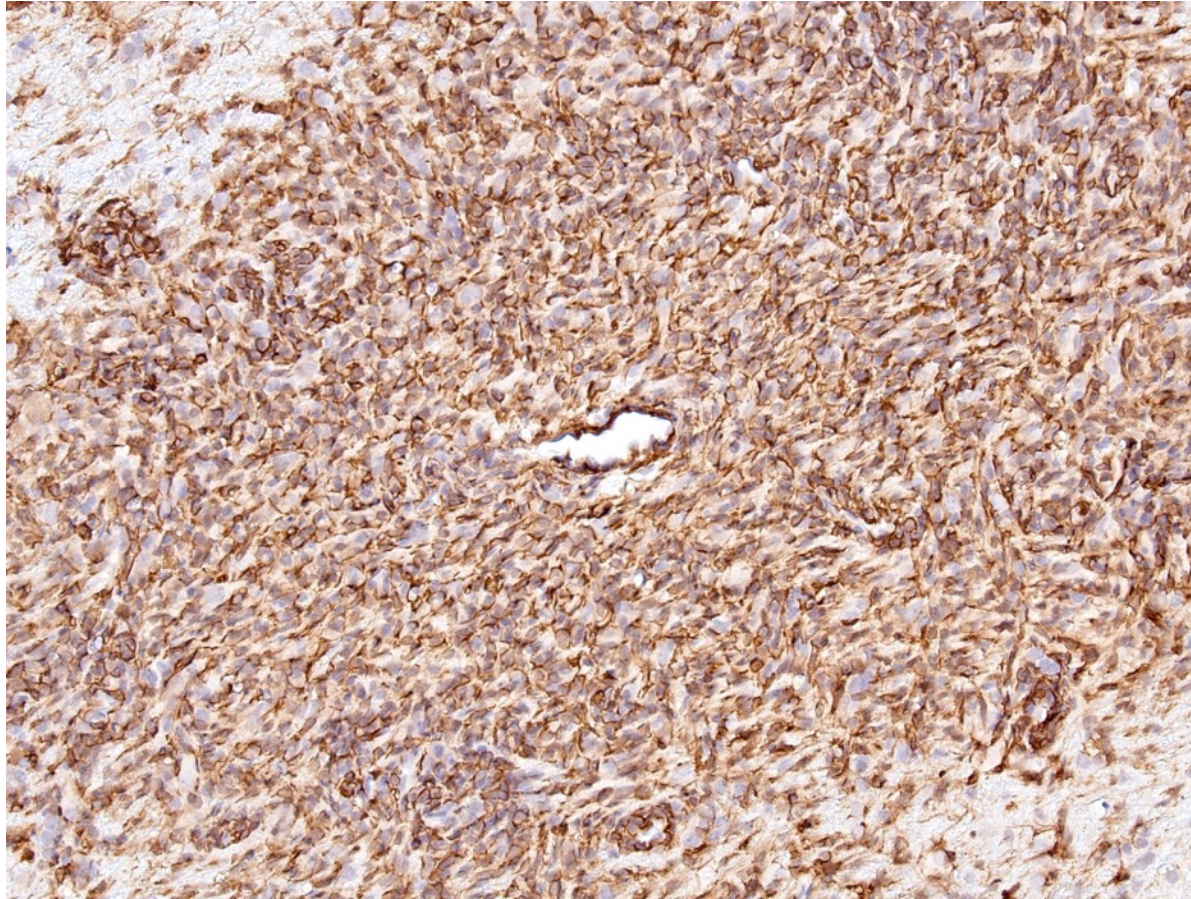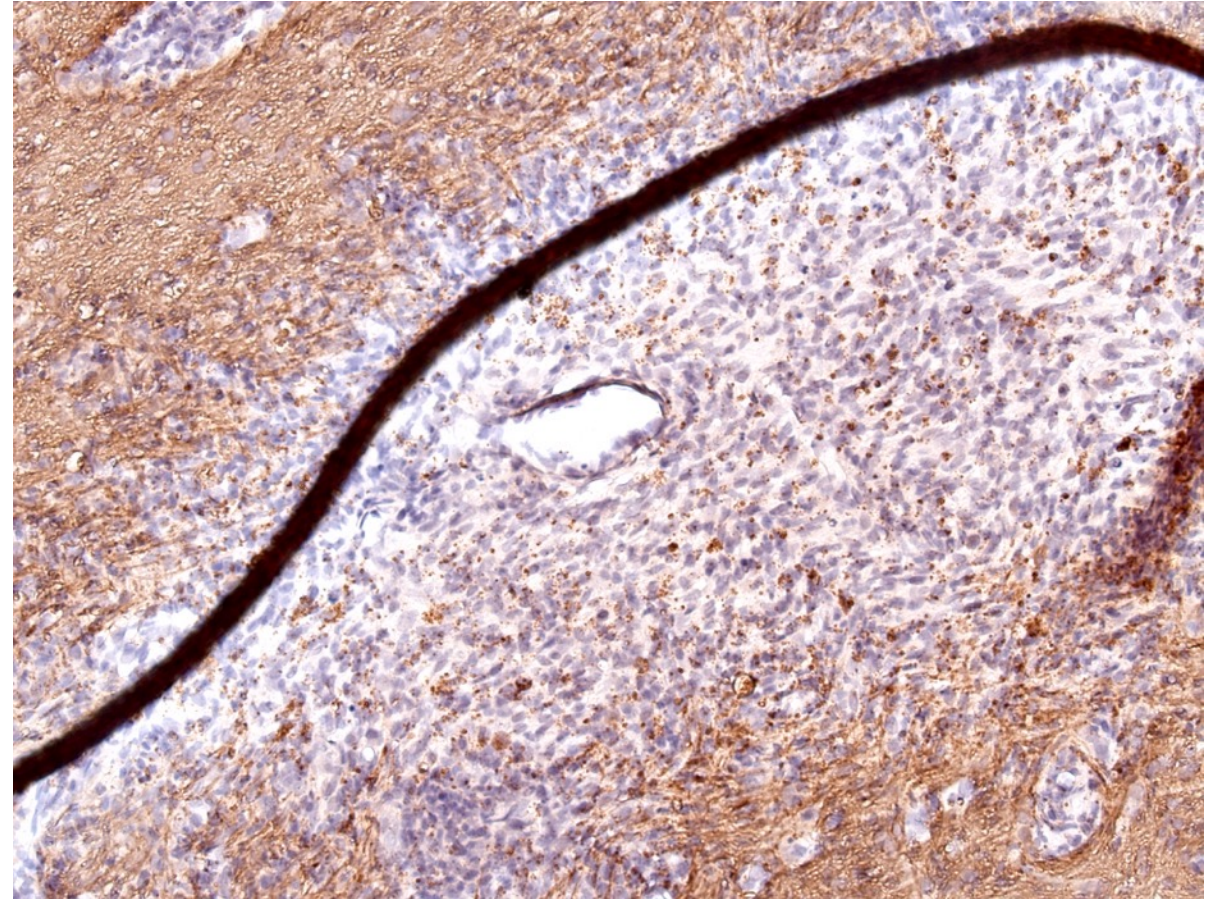

# Acute Demyelinating

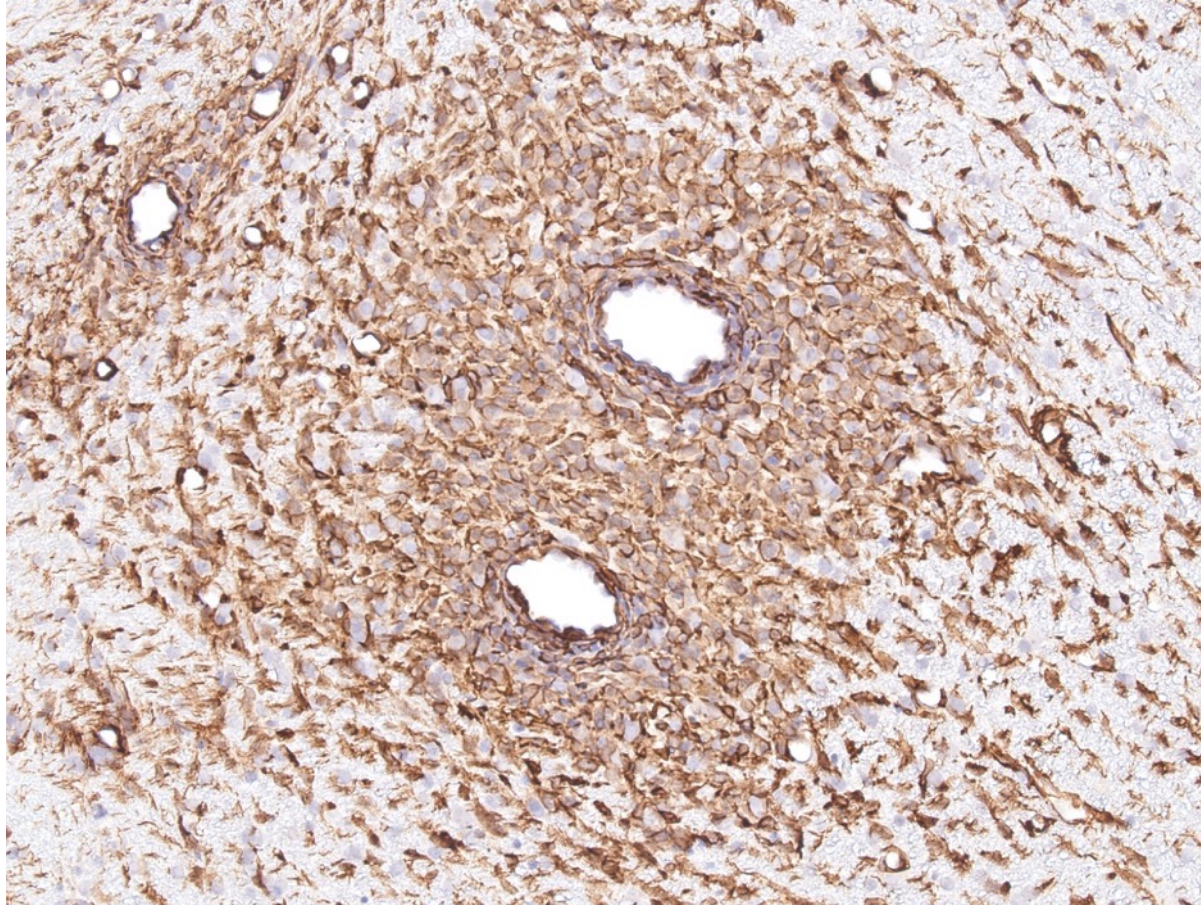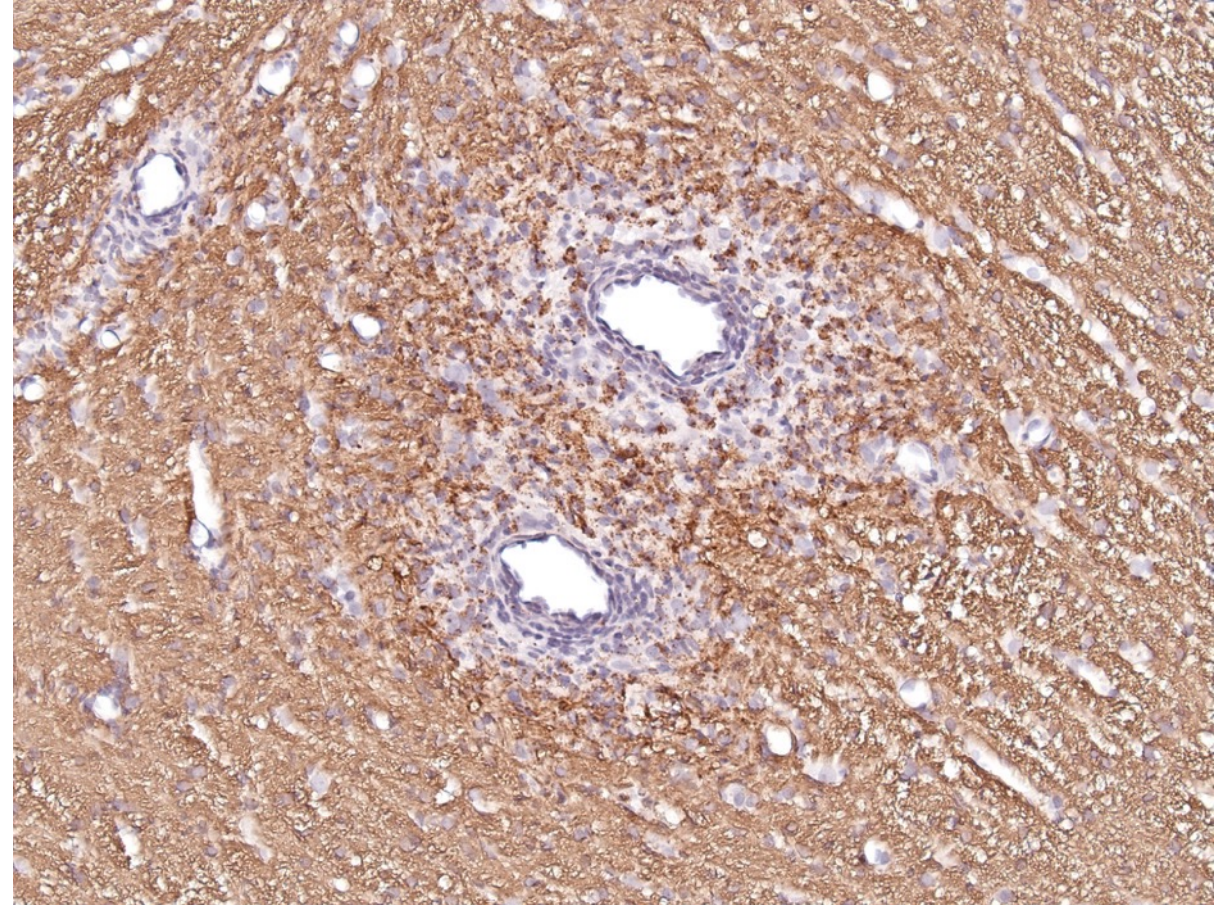

Chronic Demyelinated

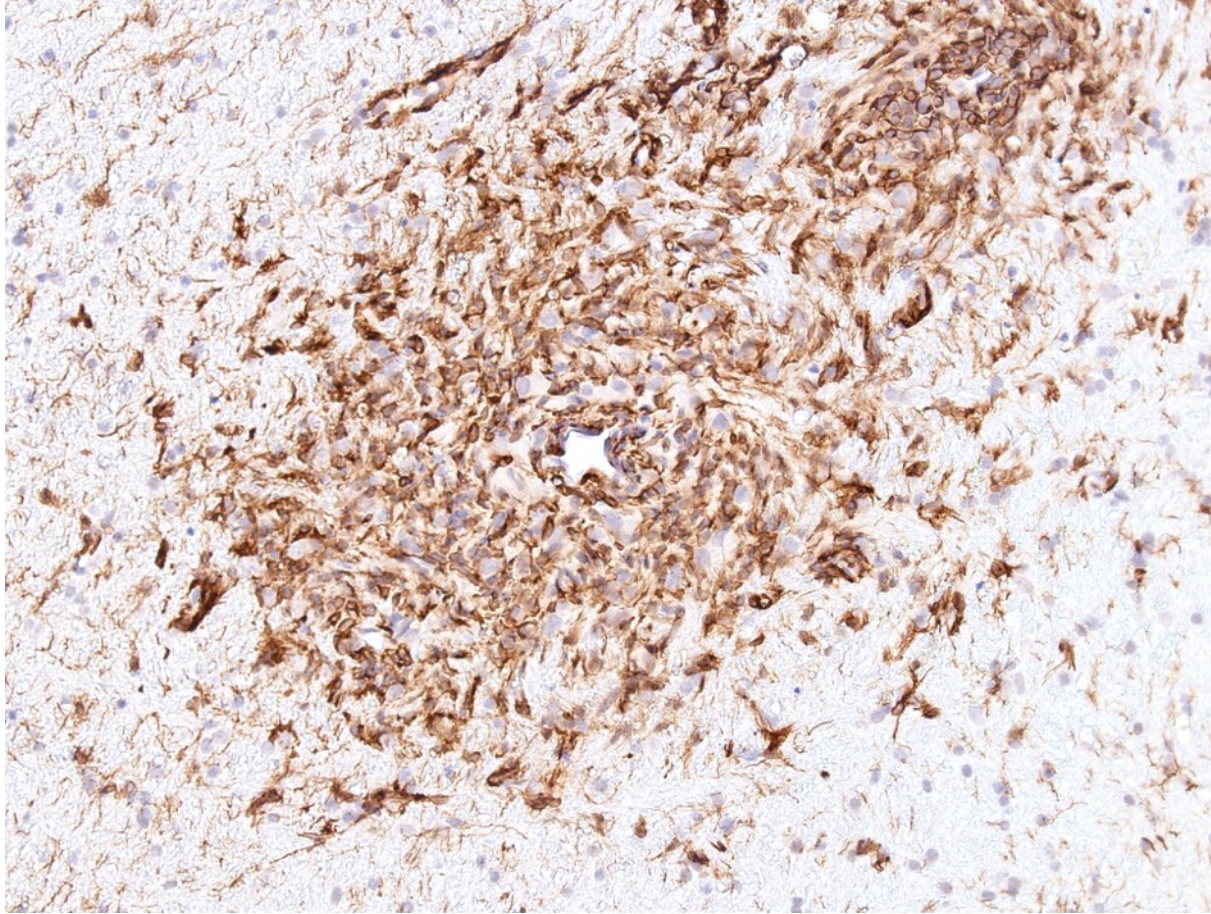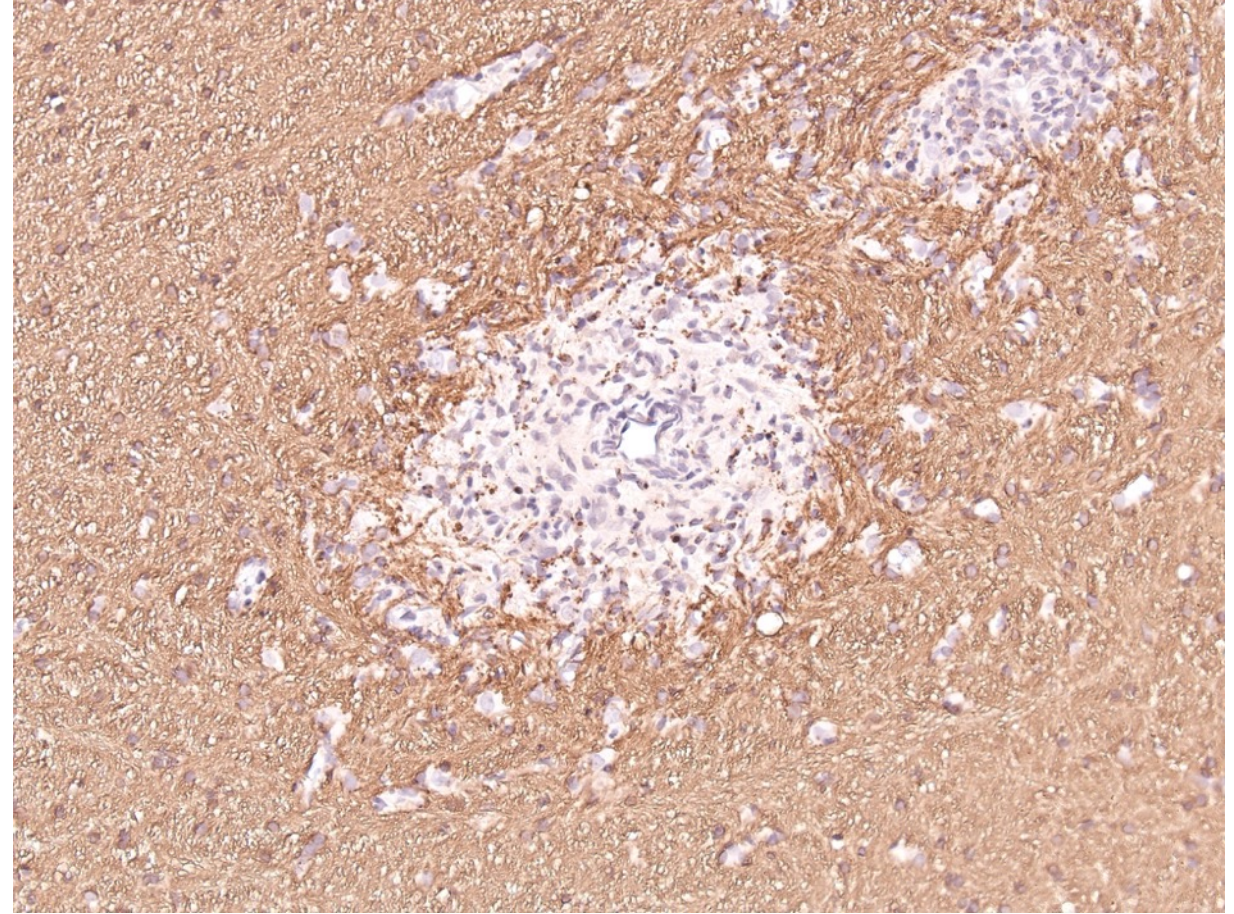

# Chronic Demyelinated

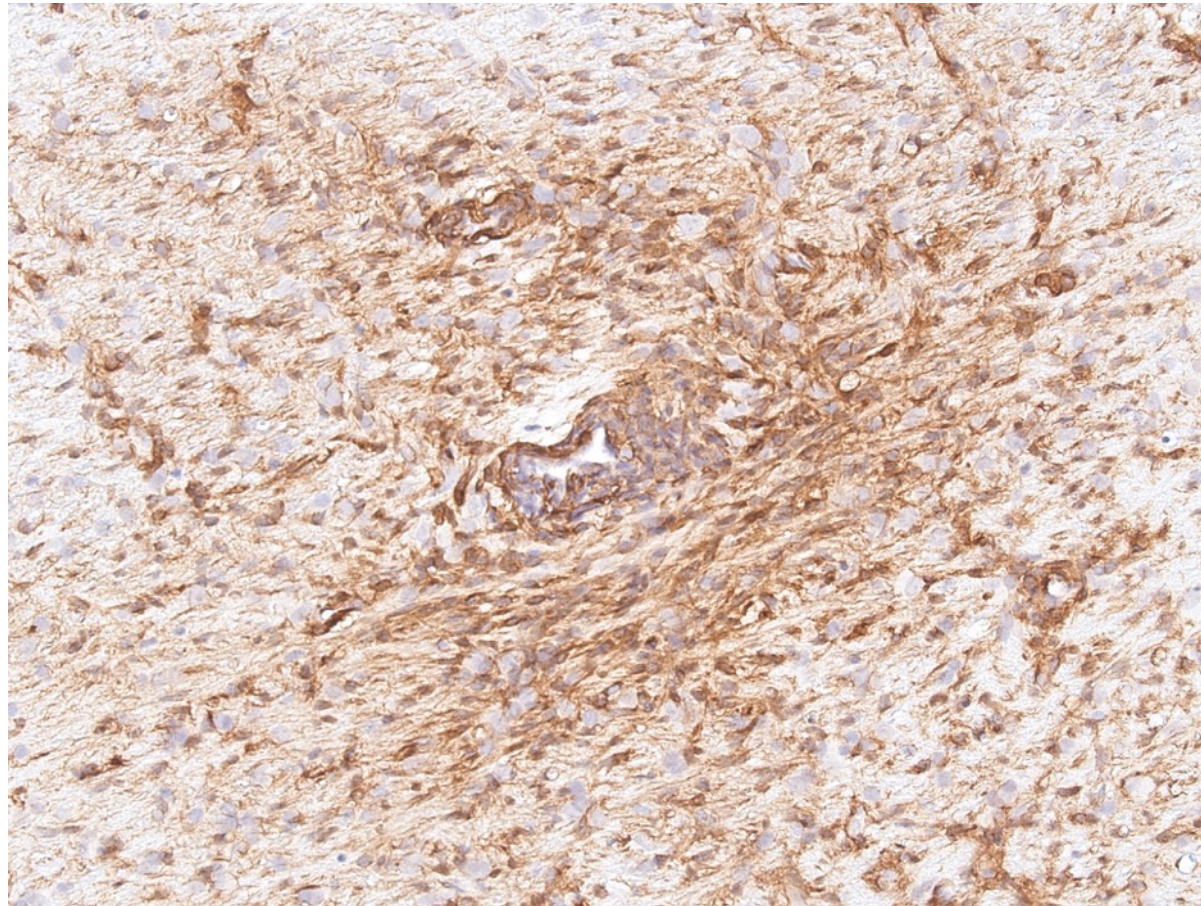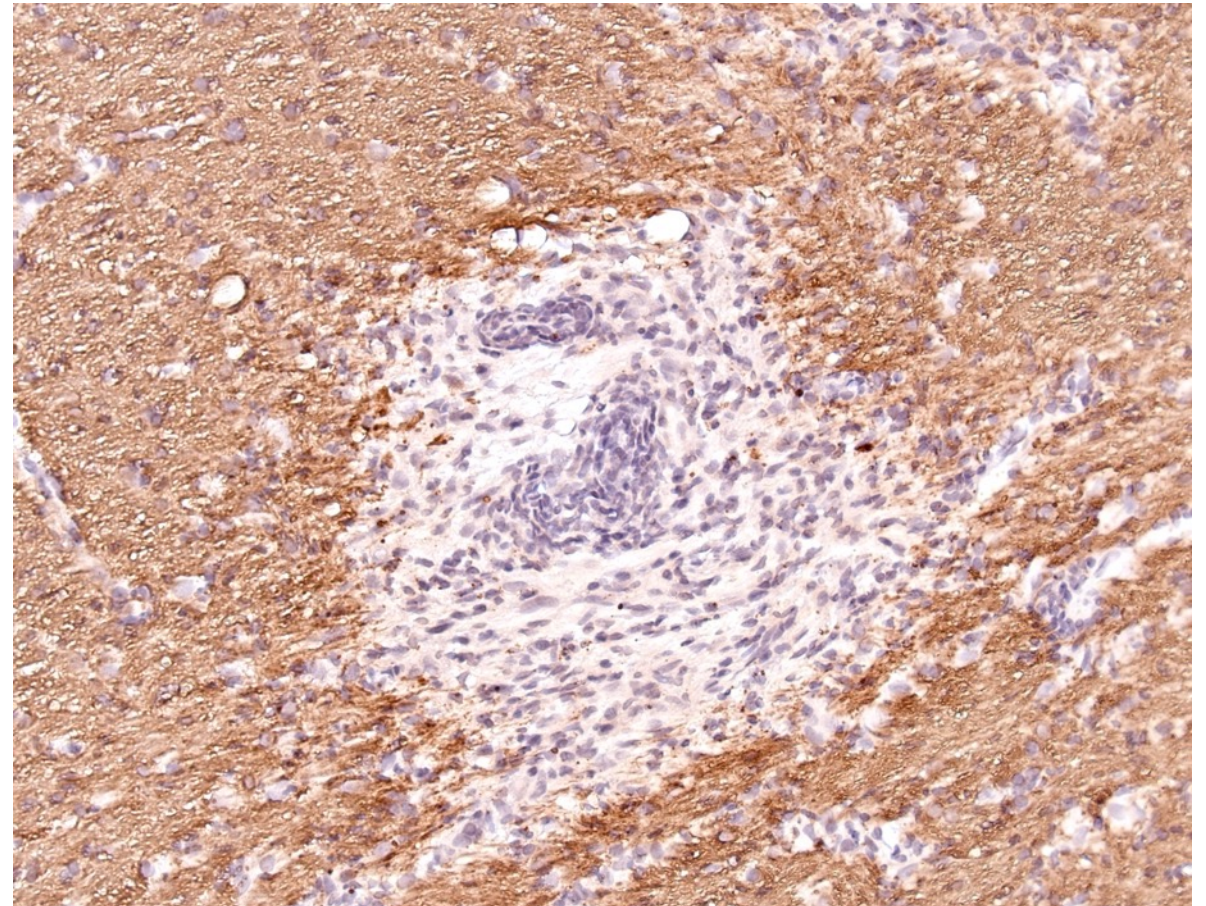

Chronic Demyelinated

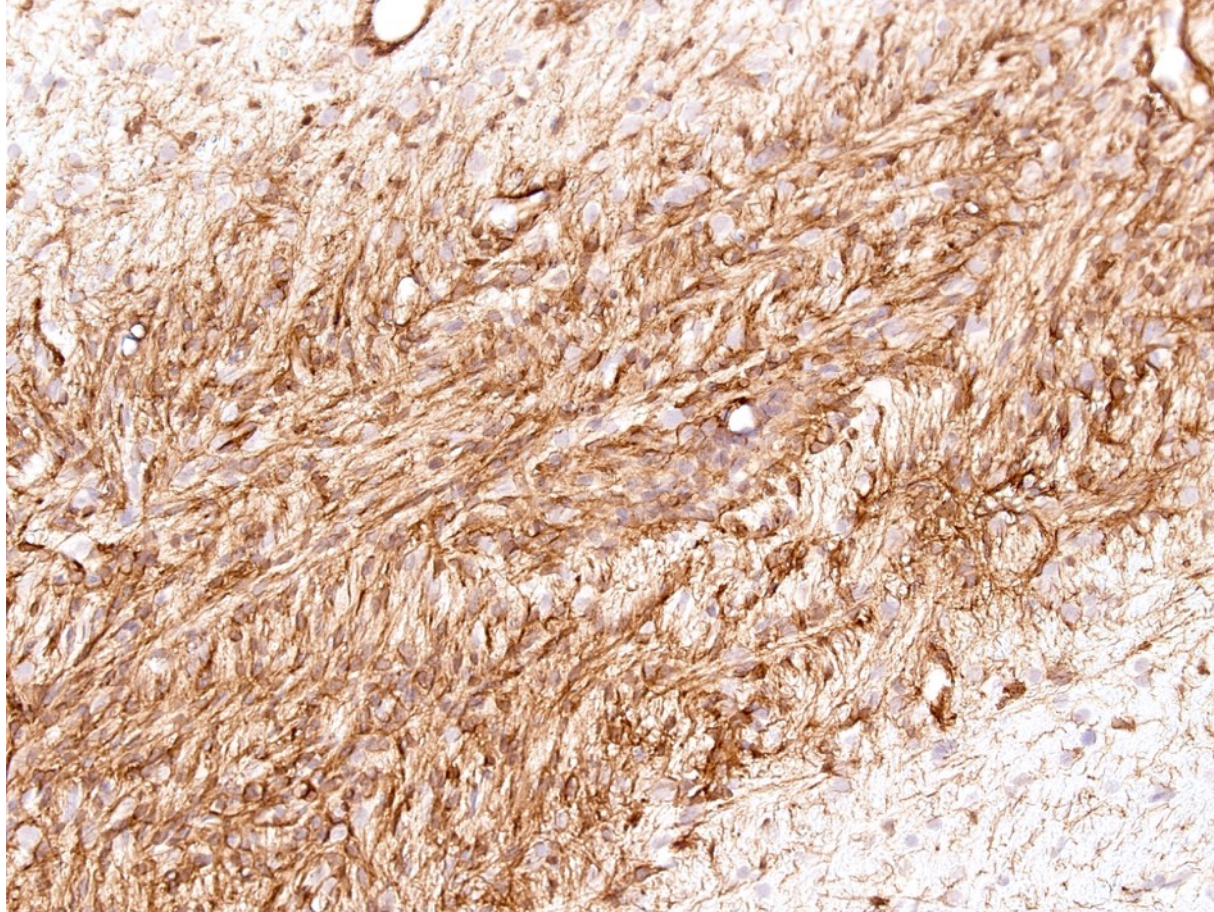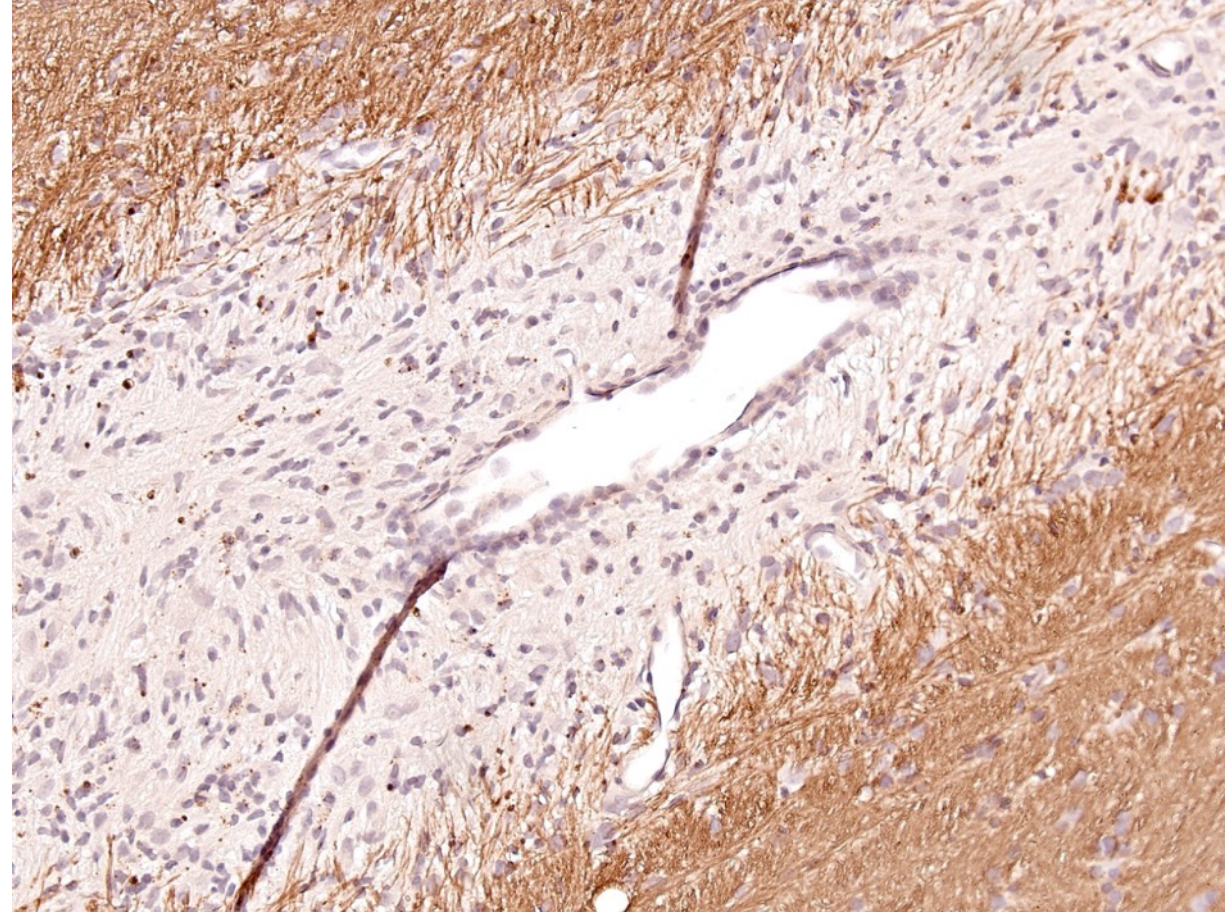

Chronic Demyelinated

Slide unavailable / damaged

Remyelinated

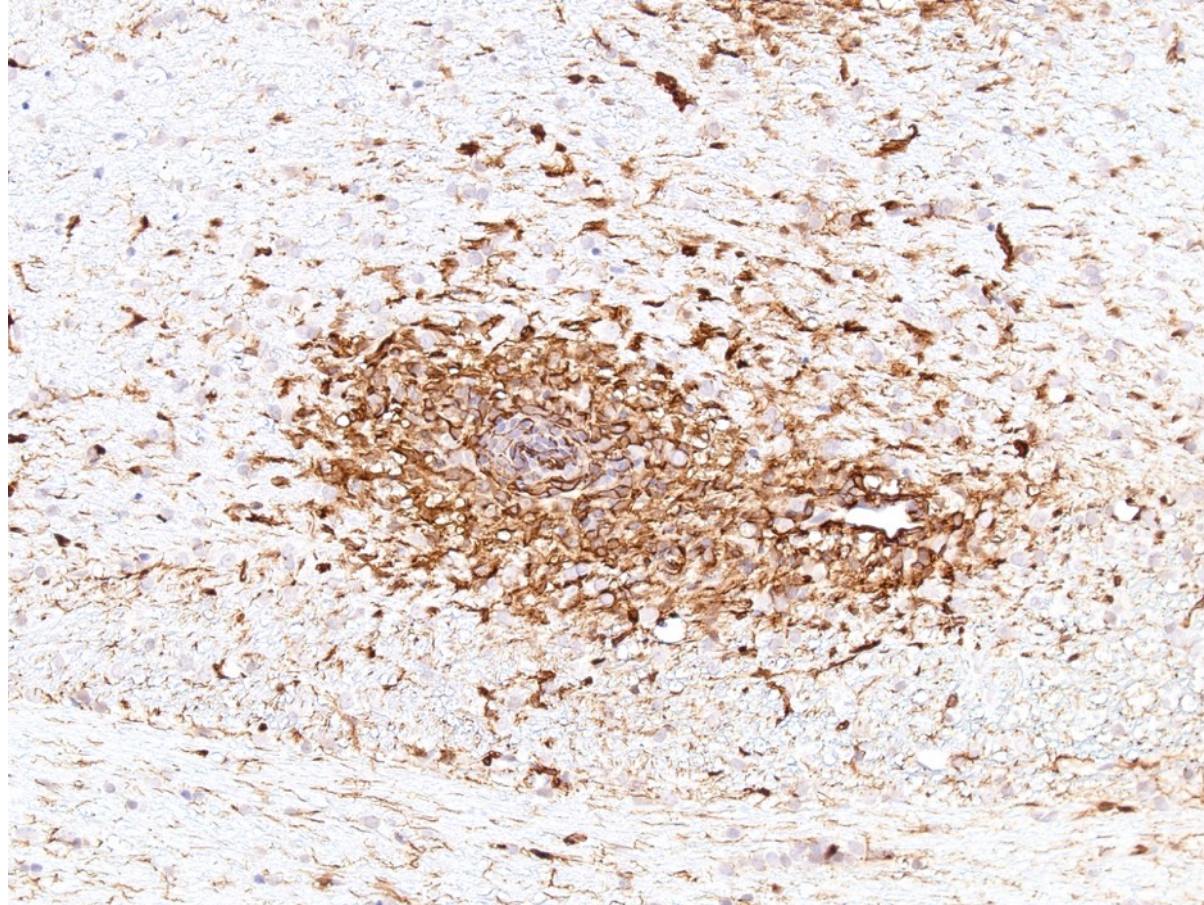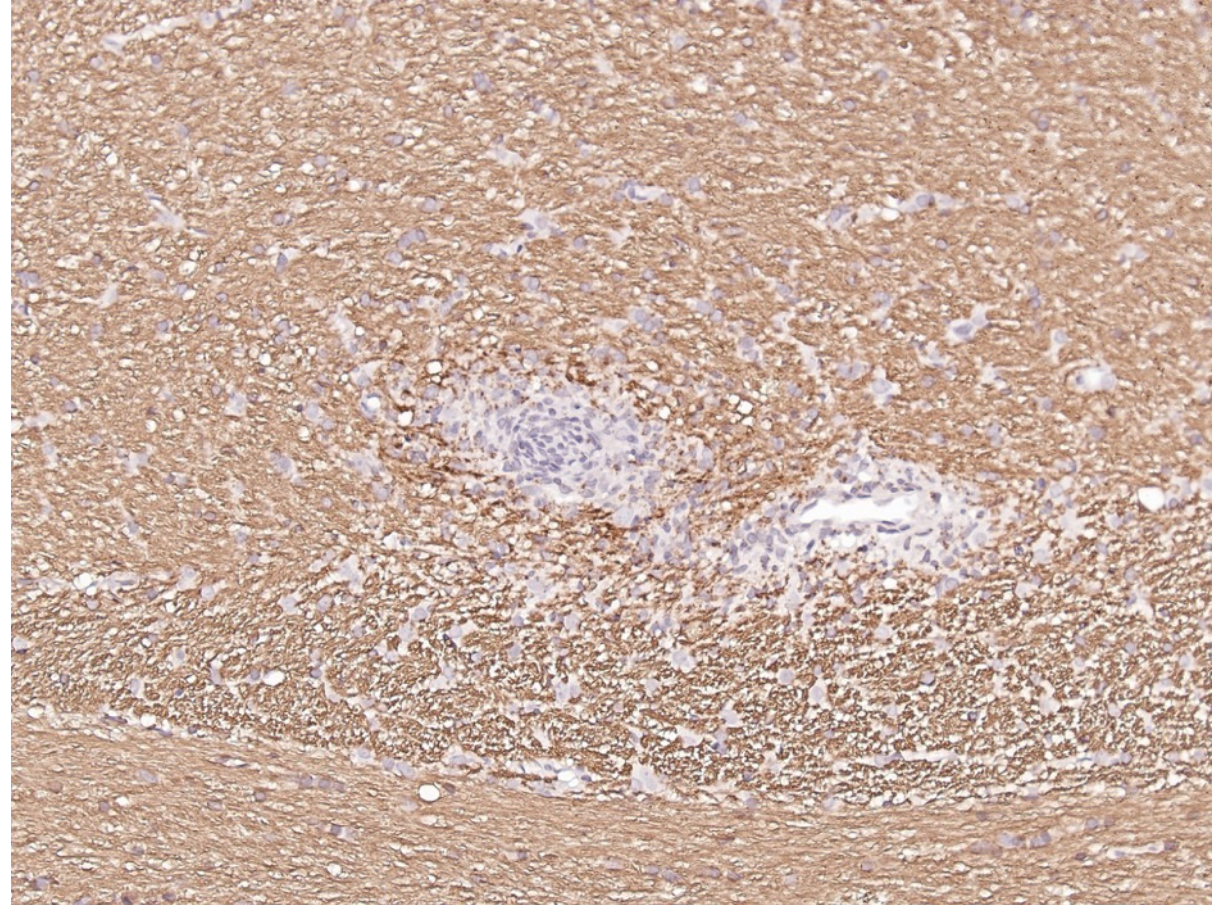

# M#6

- 5 Acute Demyelinating
- 3 Chronic Demyelinated

# Acute Demyelinating

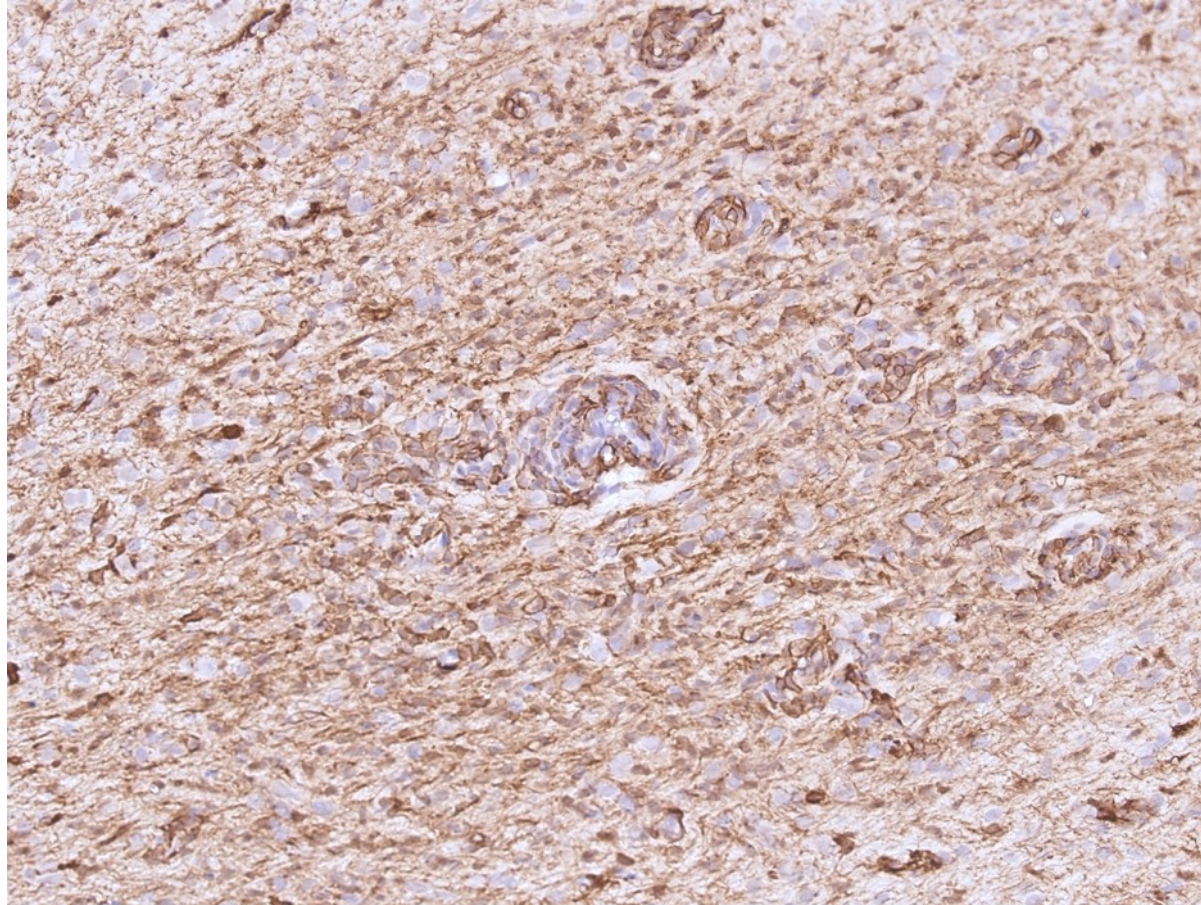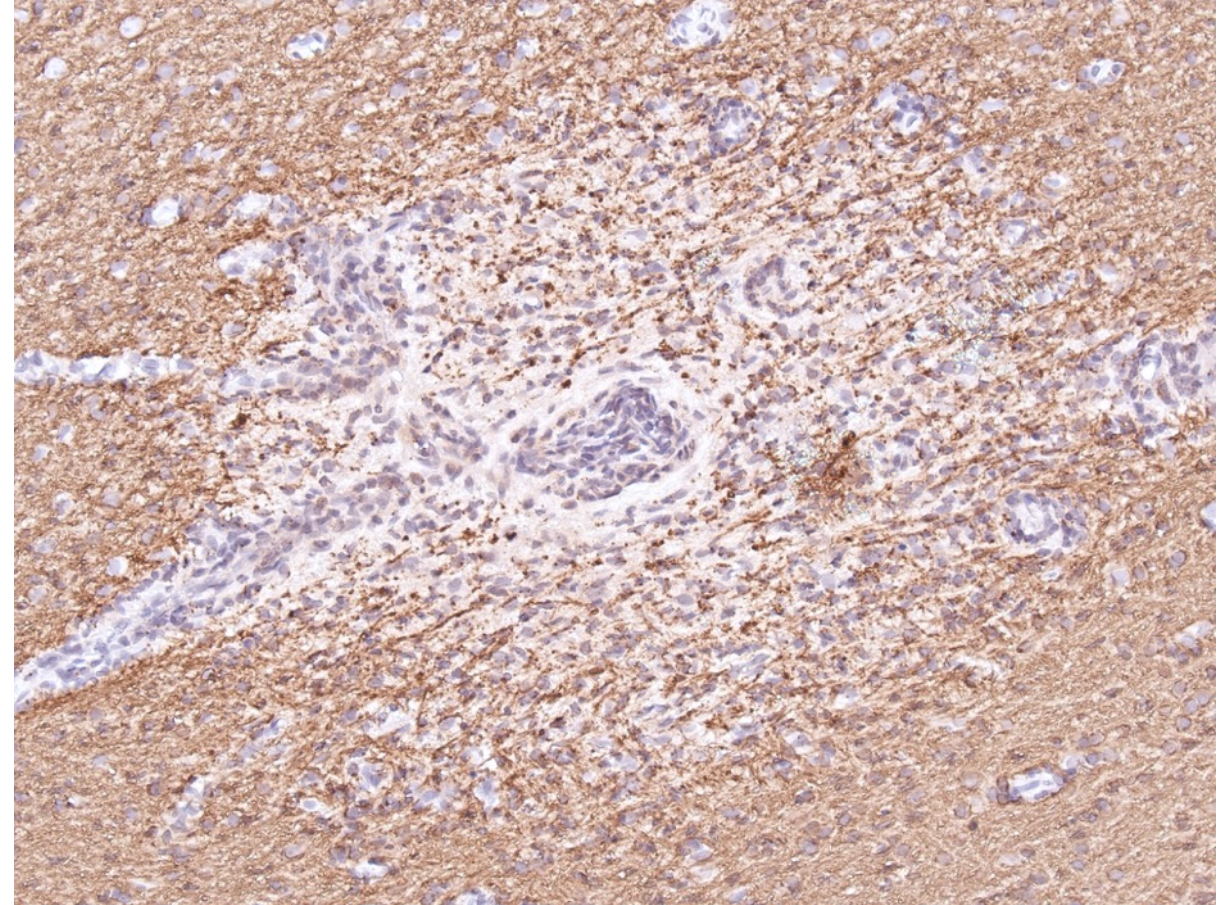

# Acute Demyelinating

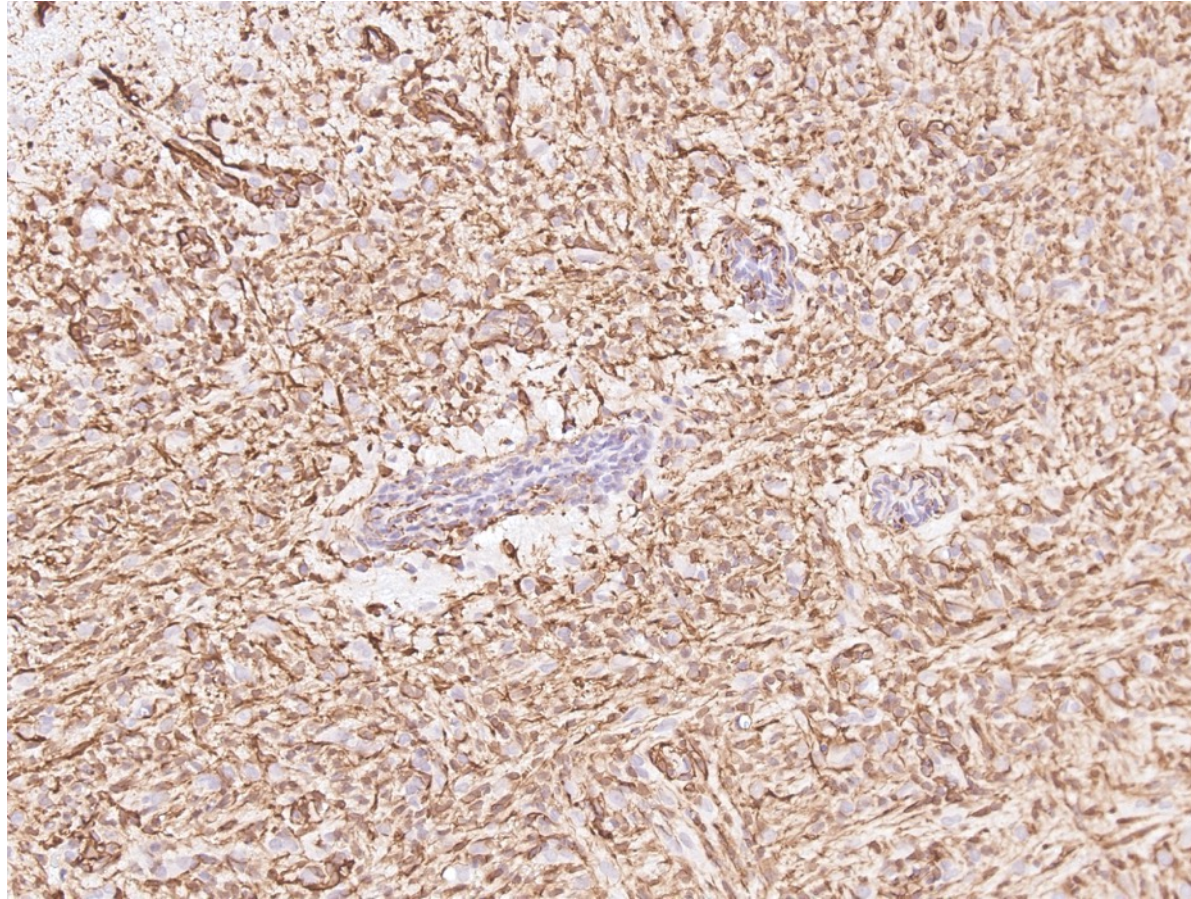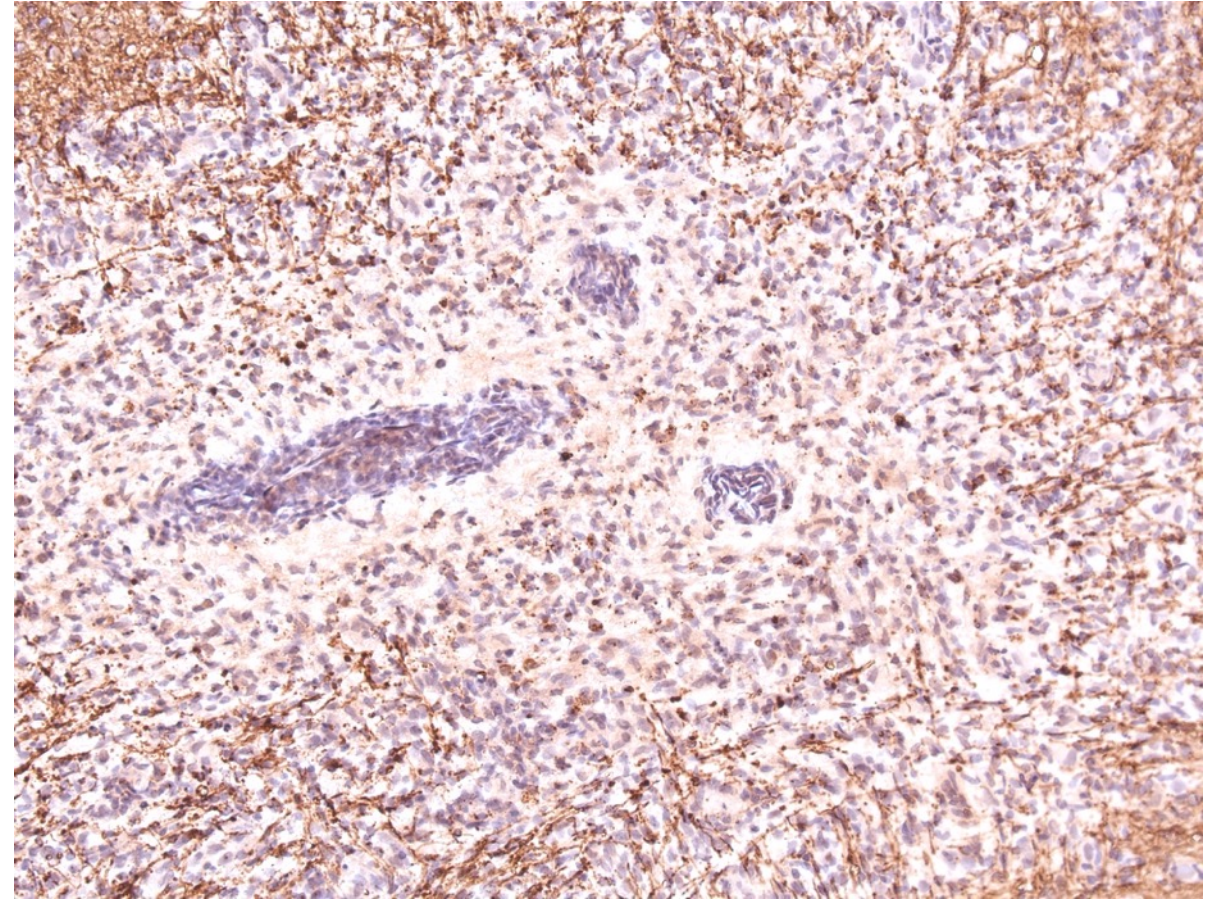

# Acute Demyelinating

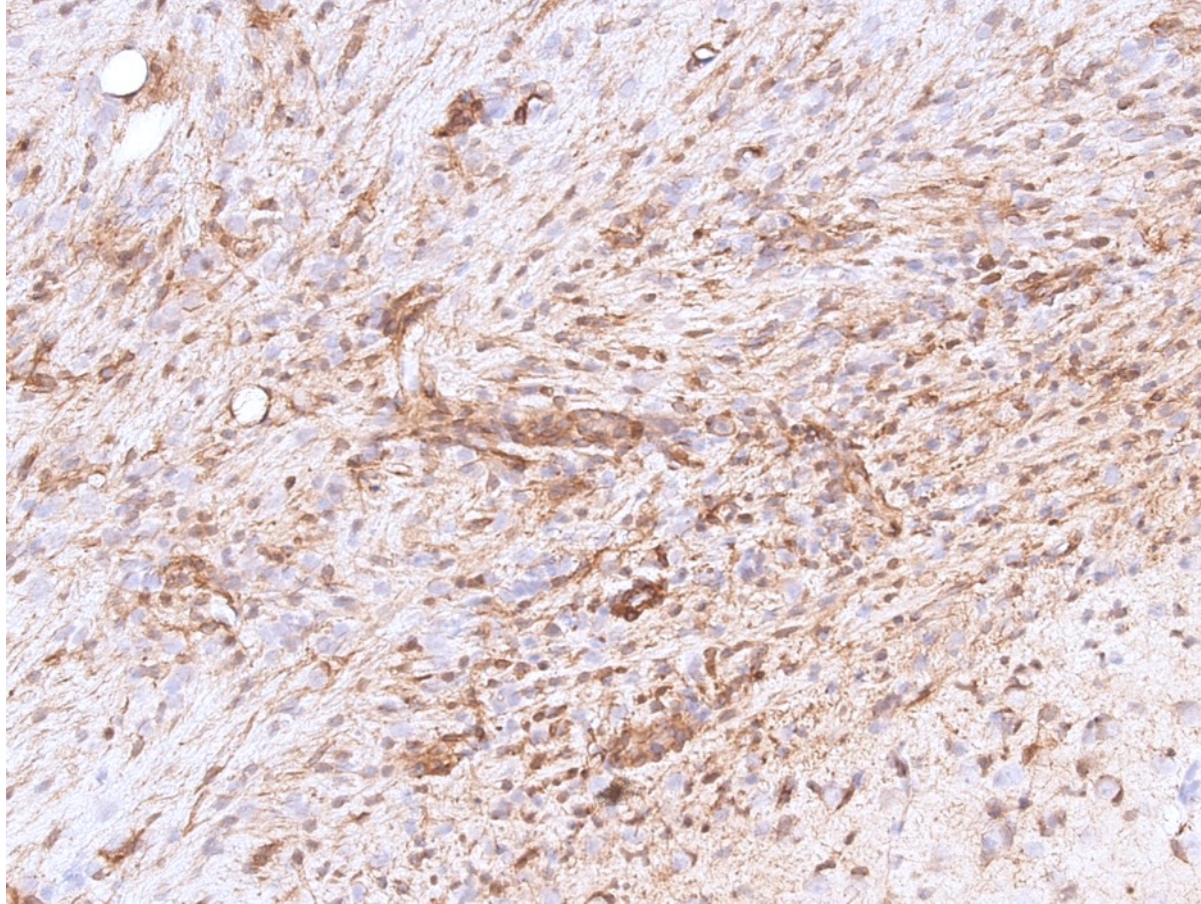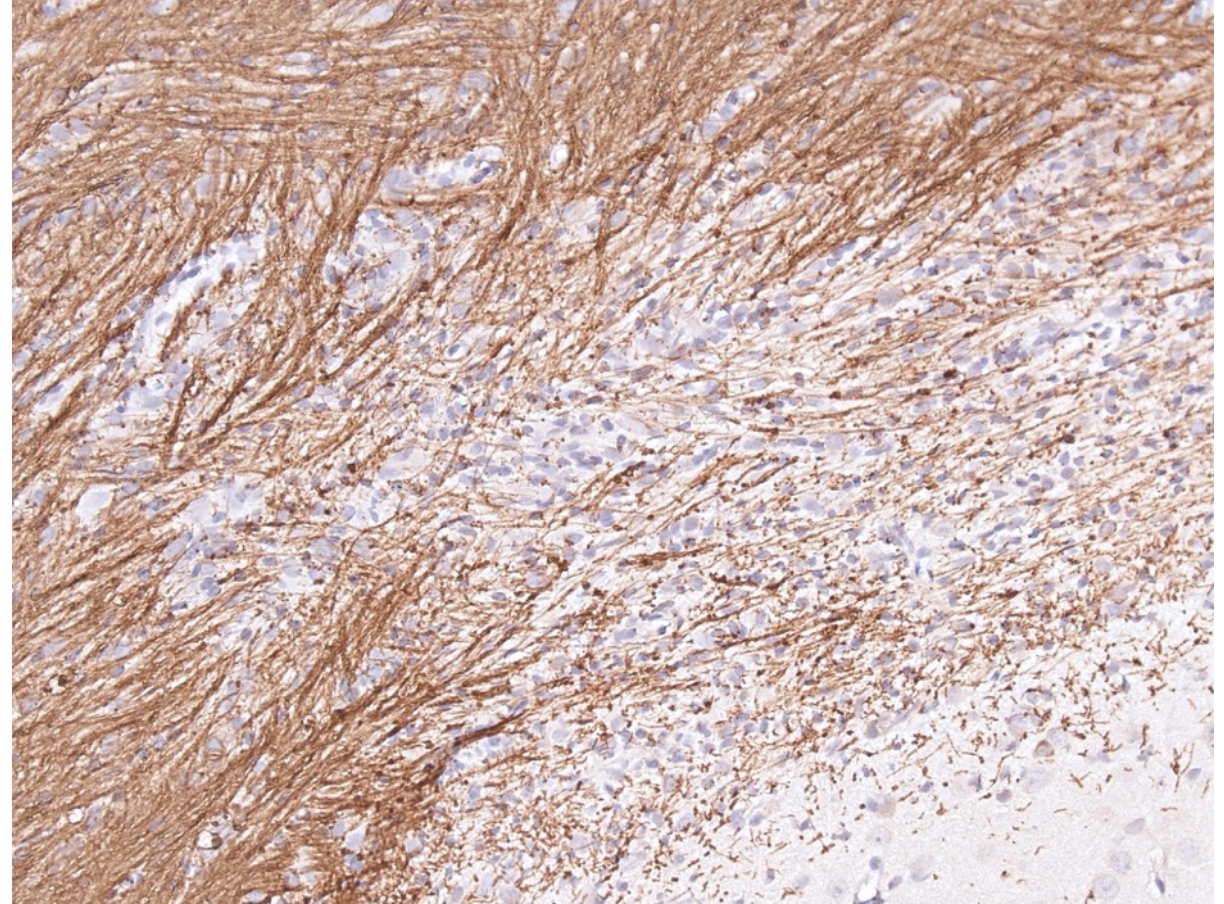

# Acute Demyelinating

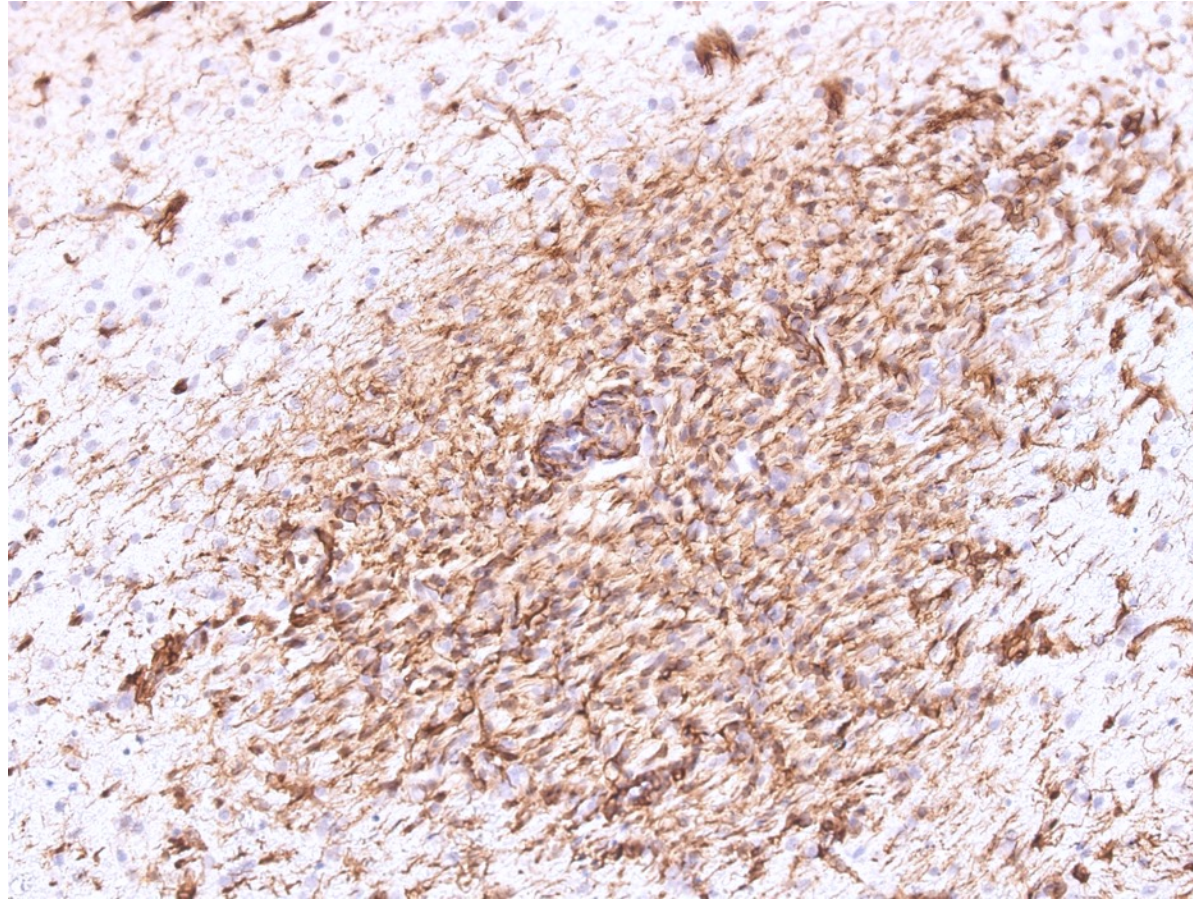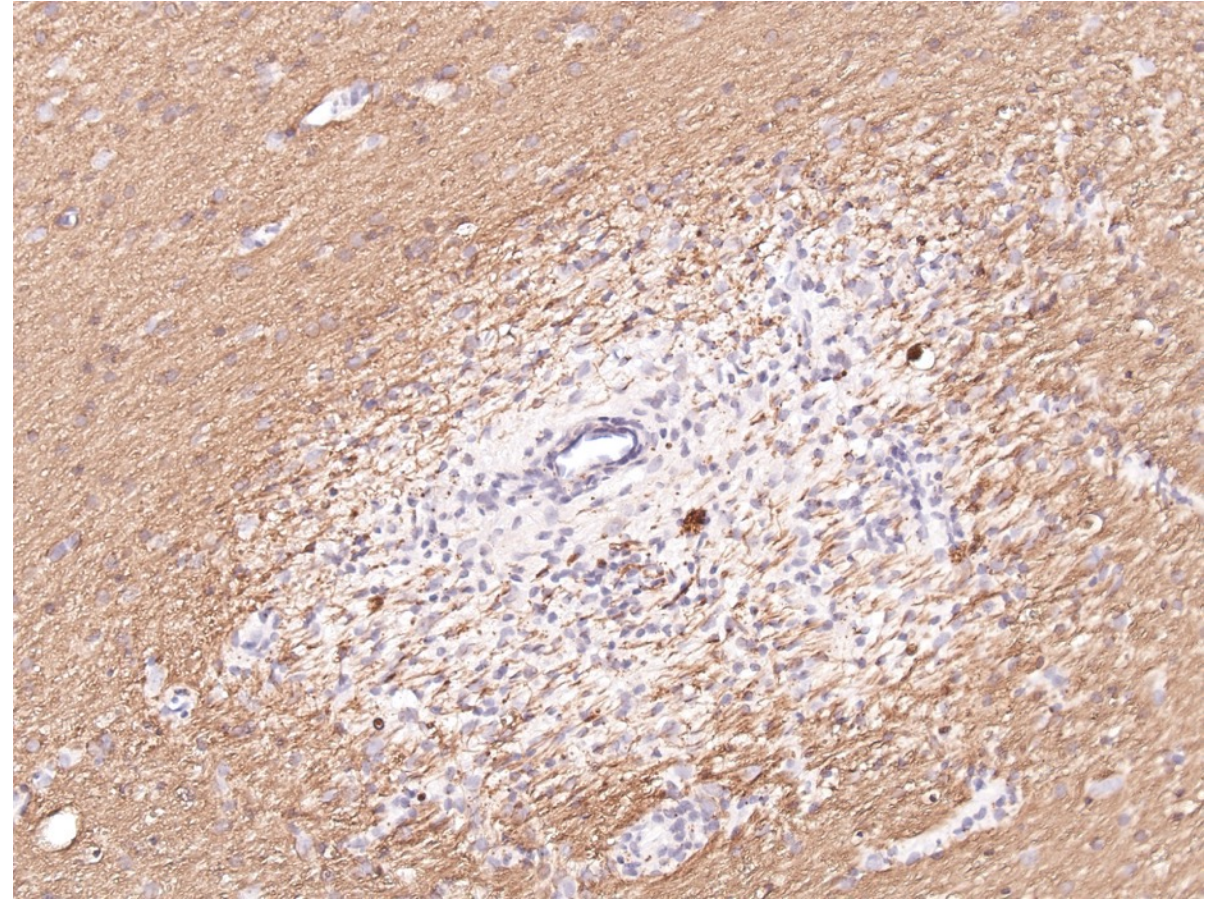

# Acute Demyelinating

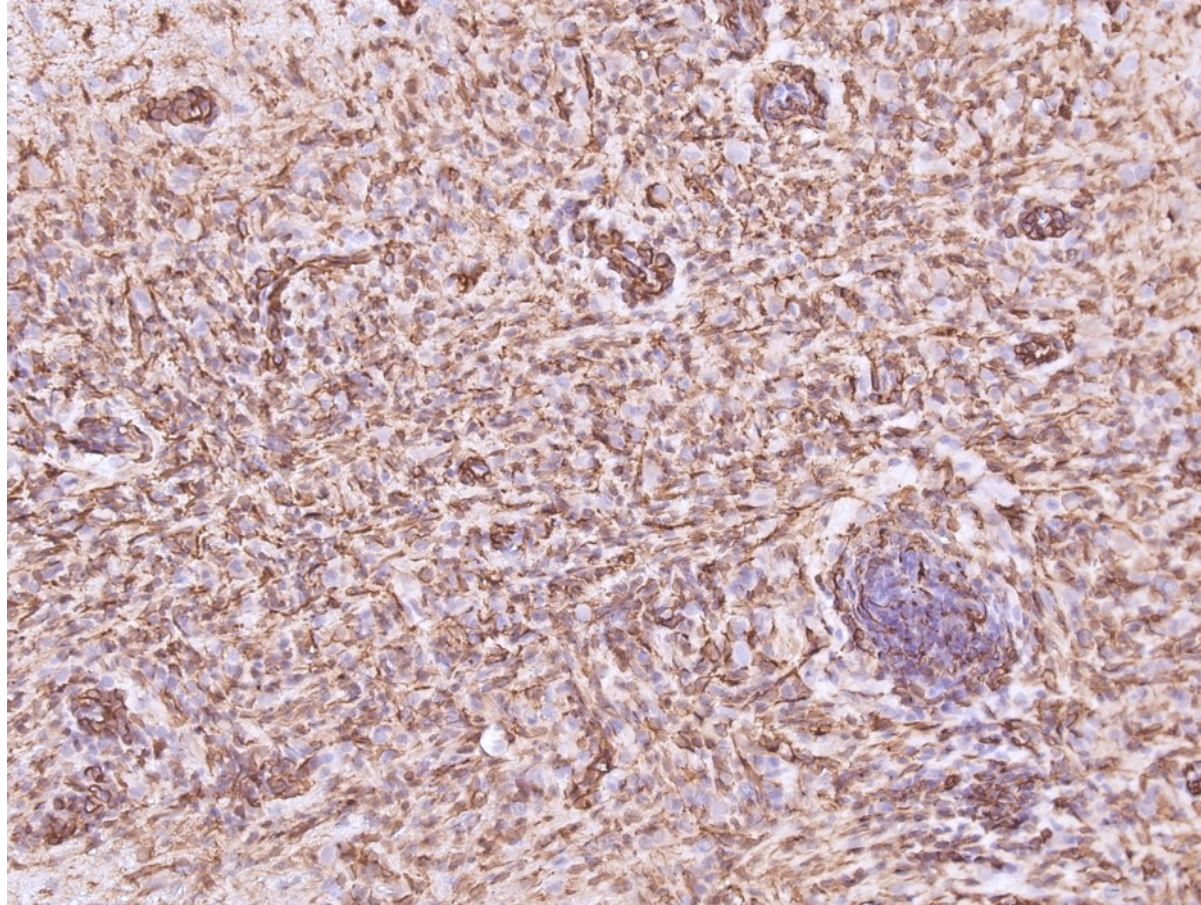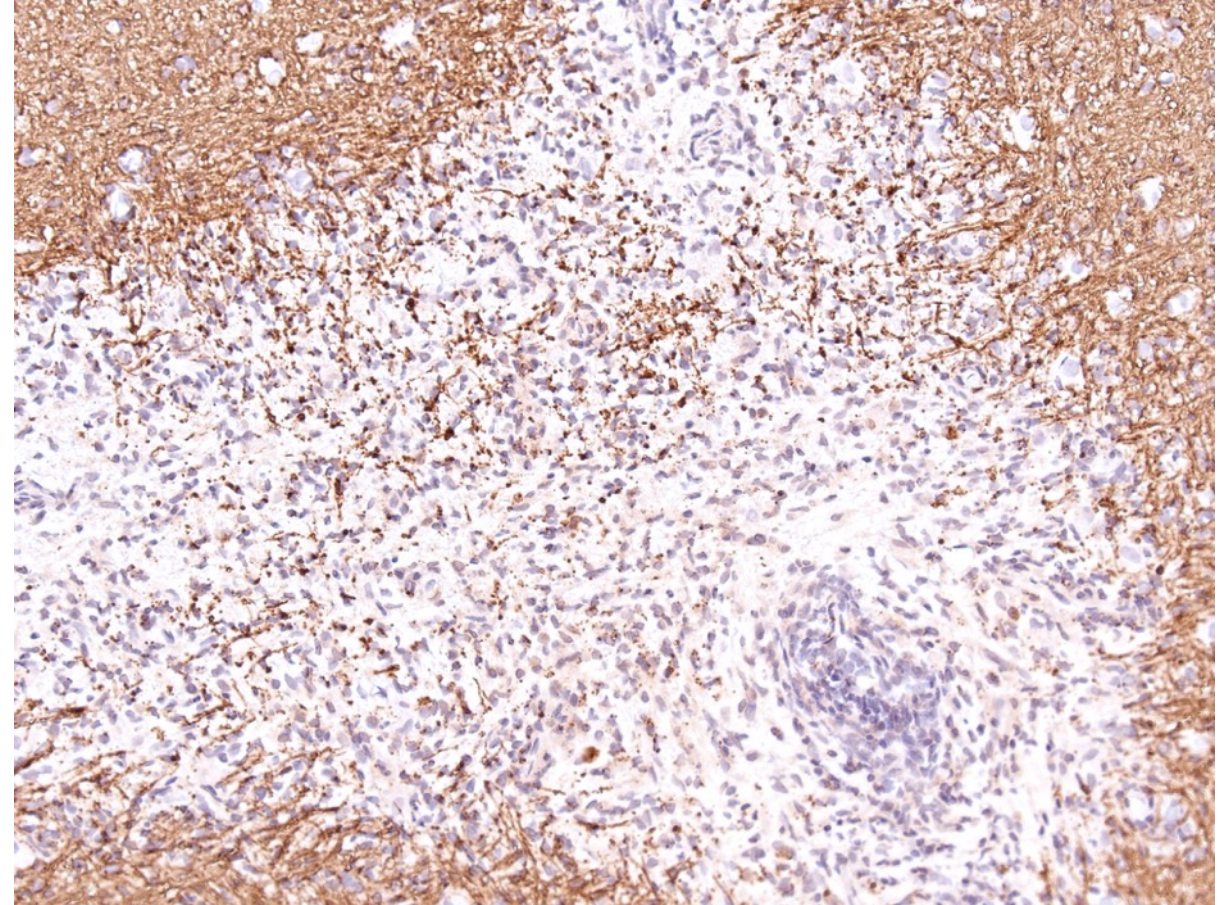

Chronic Demyelinated

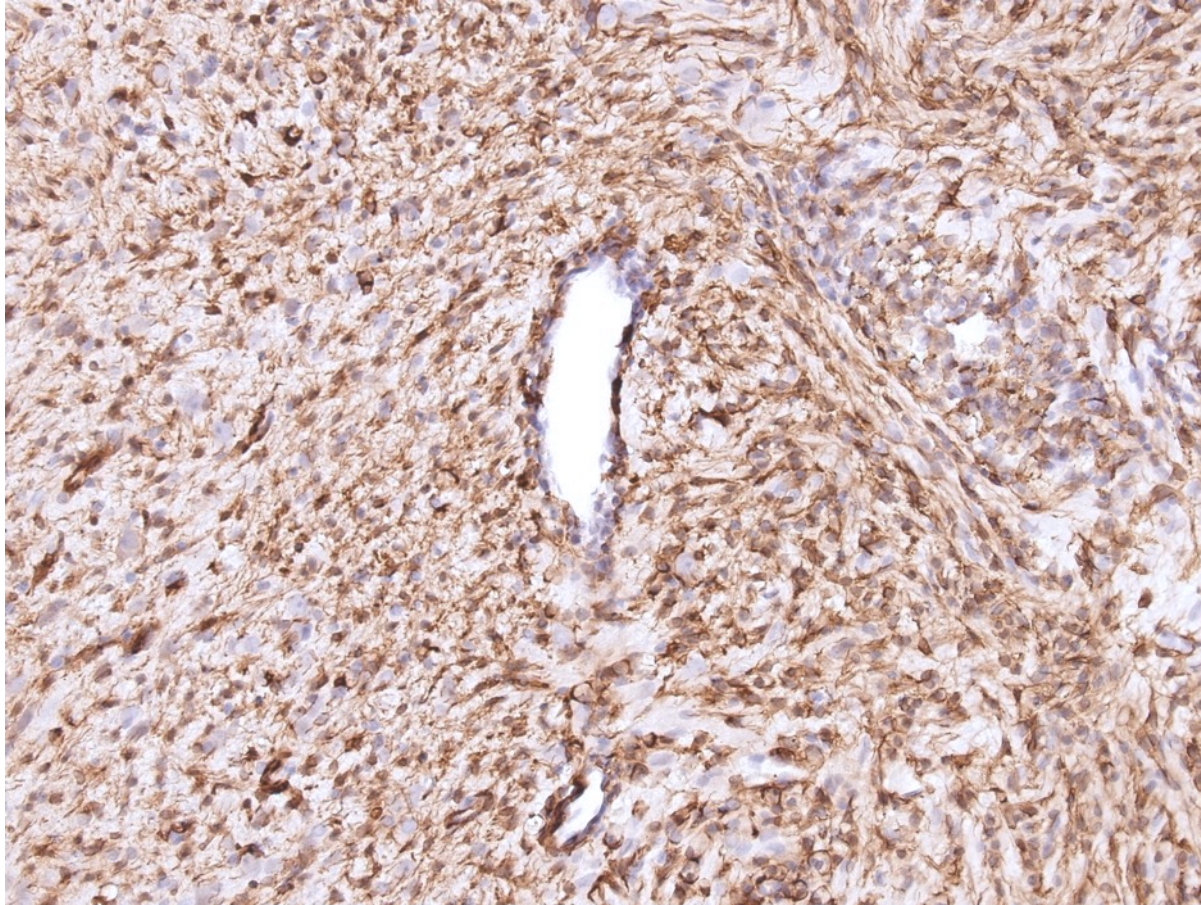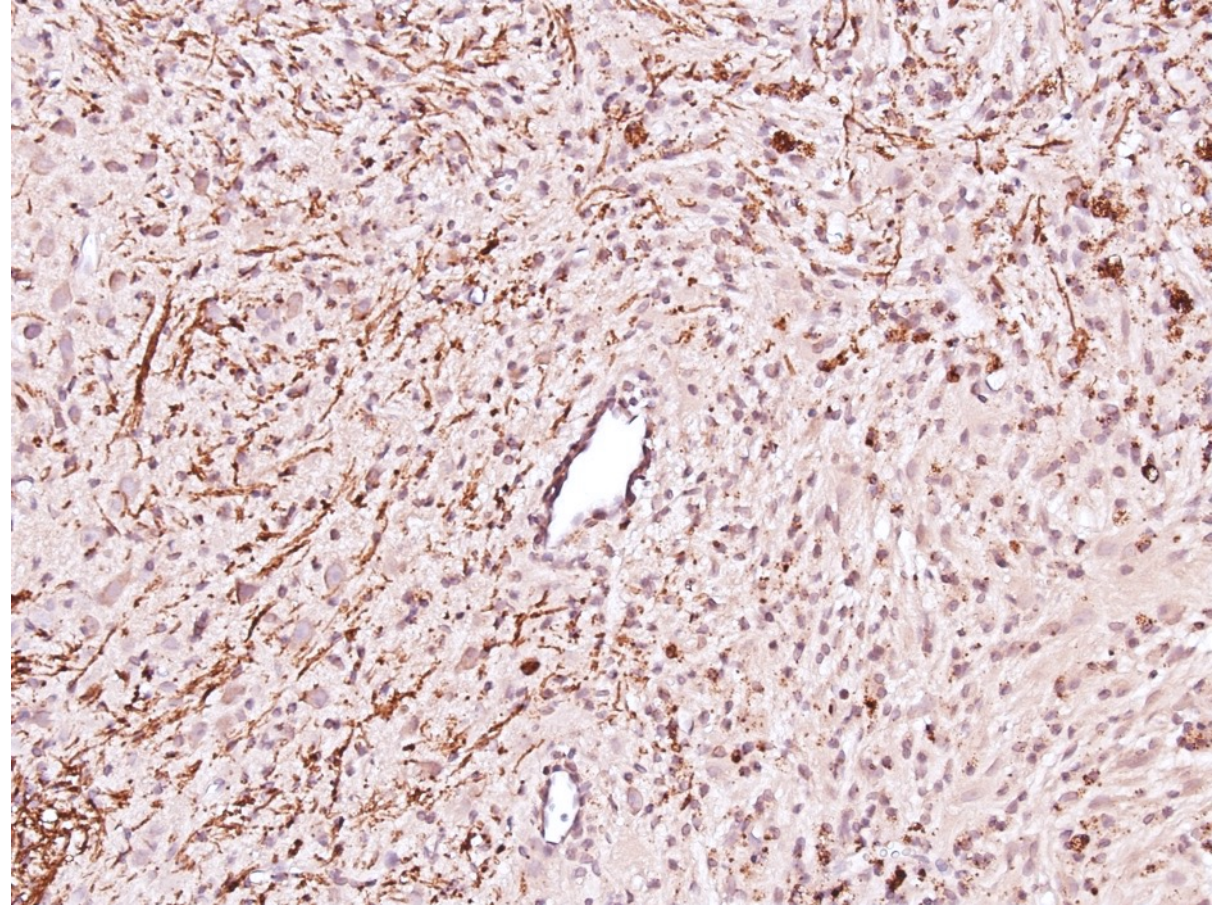

Chronic Demyelinated

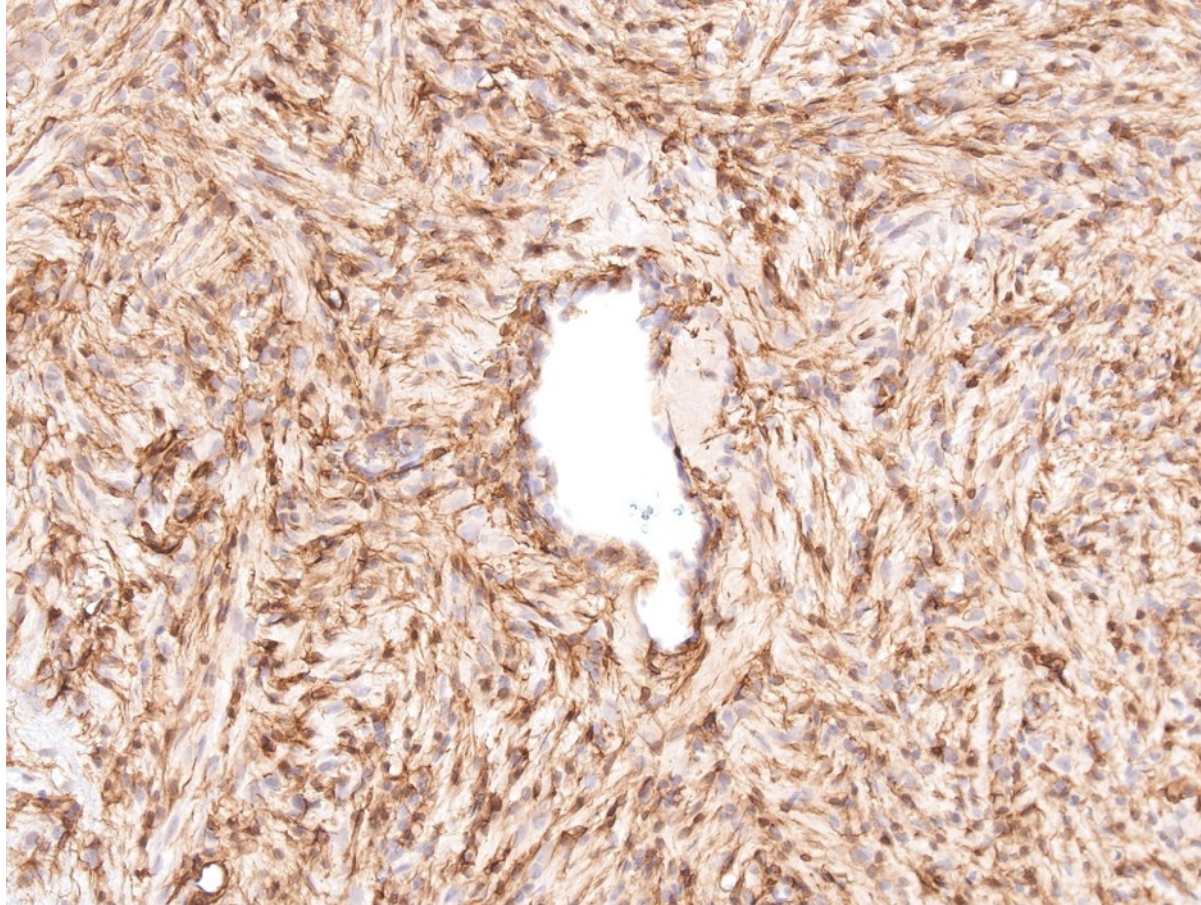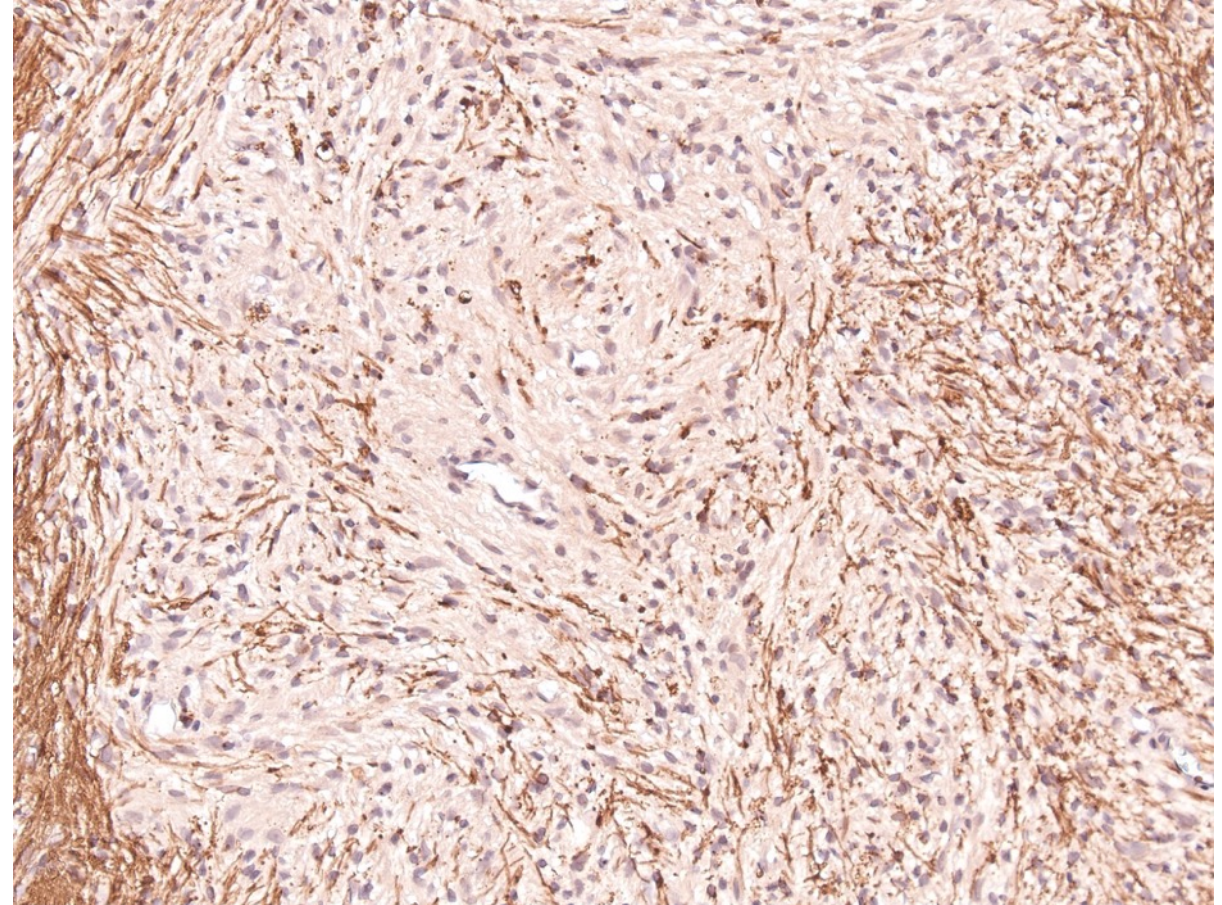

Chronic Demyelinated

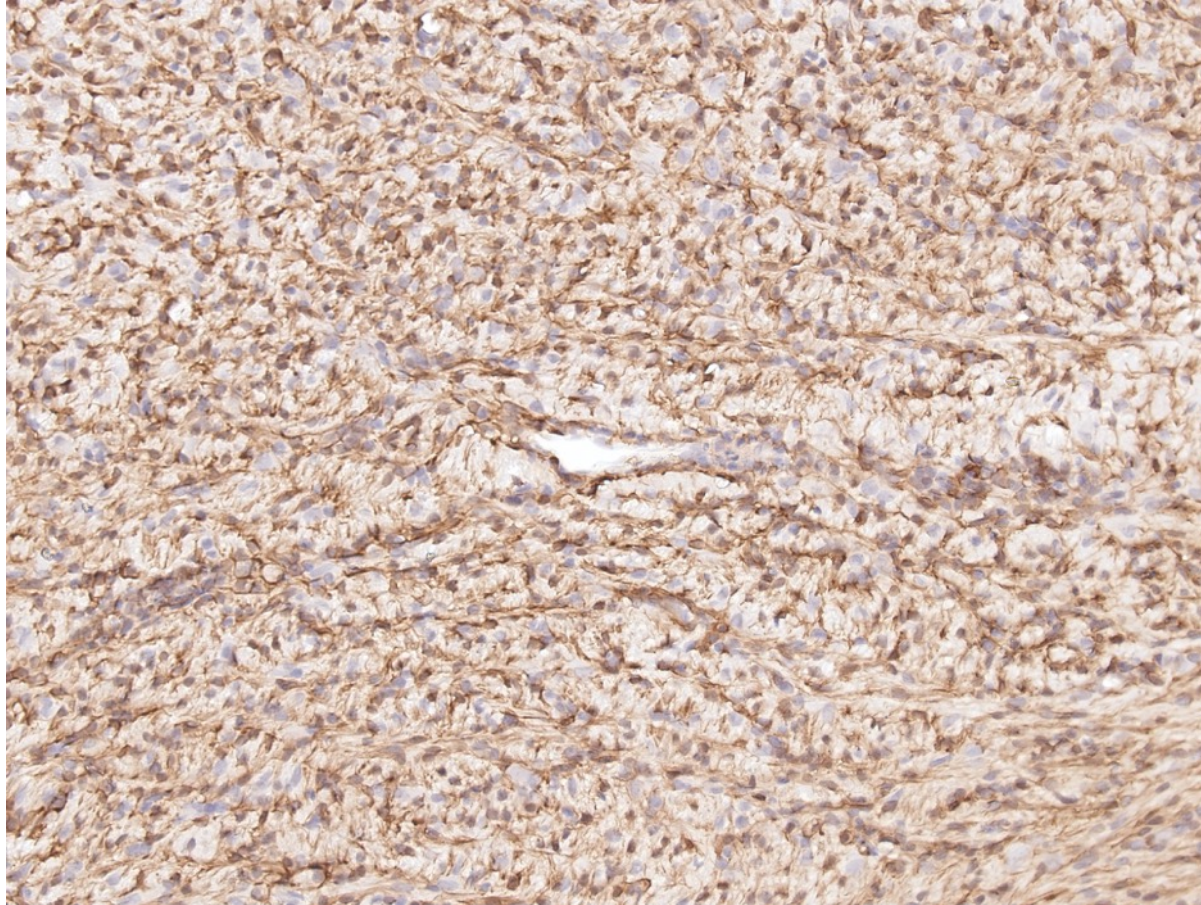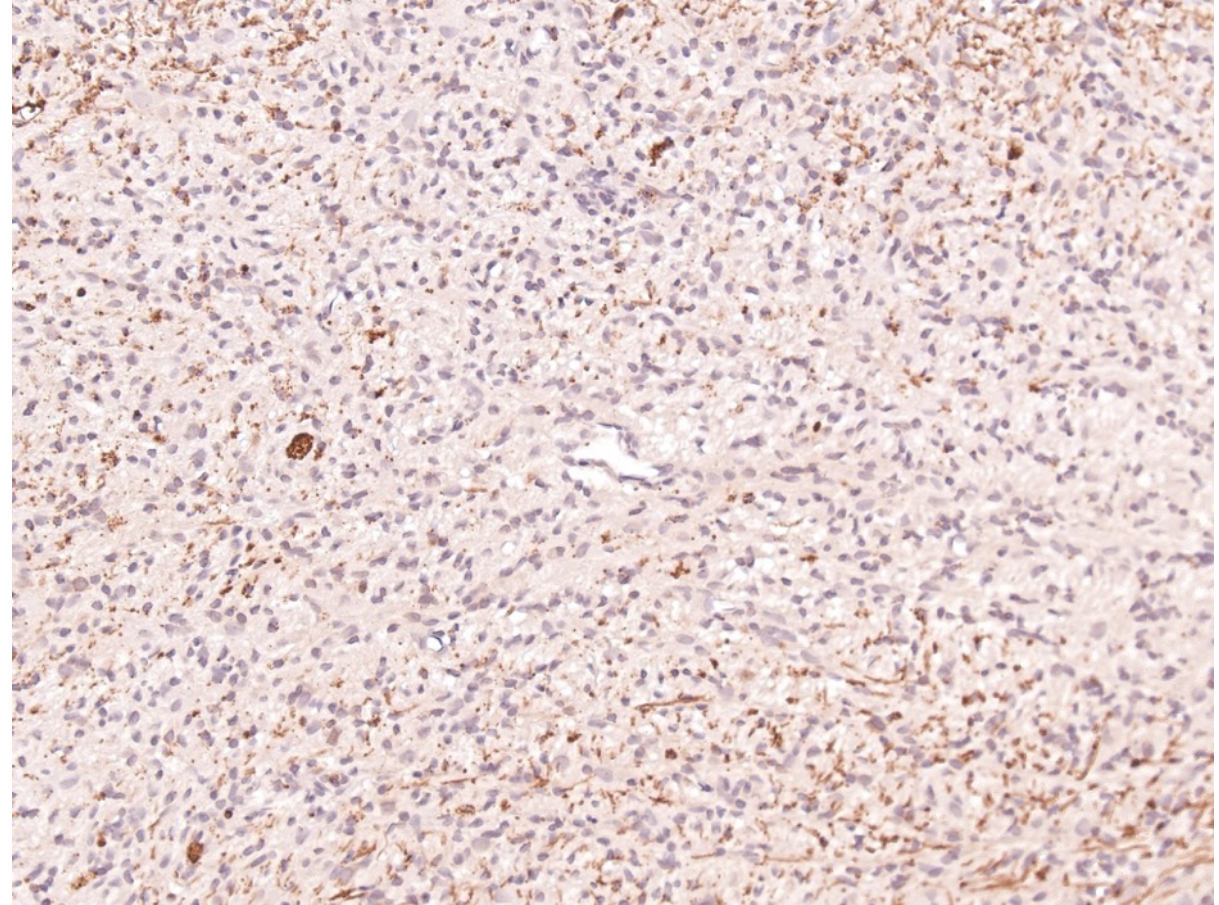

Supplement: data9 [file elife-73786-data9-v2.pdf]
